# Supplementary material for: Determination of Pesticide Residues in Fresh Fruits in the Republic of Serbia by LC-MS/MS
Source: Preprints.org preprint supplement (doi:10.20944/preprints202411.0357.v1), 2024-11-06
Supplement: Supplementary file 1 [file supplementary]

## Sheet: 2016
Supplementary material 2
	Analyte	Value (mg/kg)	Matrix	Country	Year
		/	Apple	Poland	2016
		/	Apple	Poland	2016
		/	Apple	Poland	2016
		/	Apple	Poland	2016
		/	Apple	Poland	2016
		/	Apple	Serbia	2016
		/	Apple	Serbia	2016
		/	Apple	Serbia	2016
		/	Apple	Serbia	2016
		/	Aronia	Serbia	2016
		/	Lemon	Turkey	2016
		/	Peach	Serbia	2016
		/	Pear	The Netherlands	2016
		/	Pear	Serbia	2016
		/	Pear	Serbia	2016
		/	Pear	Serbia	2016
		/	Pear	Serbia	2016
		/	Raspberry	Serbia	2016
	Acetamiprid	0.053	Apple	Serbia	2016
	Acetamiprid	0.01	Apple	Serbia	2016
	Acetamiprid	0.01	Apple	Serbia	2016
	Acetamiprid	0.021	Apple	Serbia	2016
	Acetamiprid	0.01	Apple	Serbia	2016
	Acetamiprid	0.119	Apple	Serbia	2016
	Acetamiprid	0.054	Apple	Serbia	2016
	Acetamiprid	0.014	Apple	Serbia	2016
	Acetamiprid	0.016	Apple	Serbia	2016
	Acetamiprid	0.013	Apple	Serbia	2016
	Acetamiprid	0.014	Apple	Serbia	2016
	Acetamiprid	0.026	Pear	Serbia	2016
	Acetamiprid	0.01	Pear	Serbia	2016
	Acetamiprid	0.023	Grapefruit	Turkey	2016
	Acetamiprid	0.31	Grapefruit	Turkey	2016
	Acetamiprid	0.098	Grapefruit	Turkey	2016
	Acetamiprid	0.196	Grapefruit	Turkey	2016
	Acetamiprid	0.241	Grapefruit	Turkey	2016
	Acetamiprid	0.058	Grapefruit	Turkey	2016
	Acetamiprid	0.014	Apple	Poland	2016
	Acetamiprid	0.033	Apple	Poland	2016
	Acetamiprid	0.01	Apple	Poland	2016
	Acetamiprid	0.061	Pear	Bosnia and Herzegovina	2016
	Acetamiprid	0.085	Lemon	Turkey	2016
	Acetamiprid	0.036	Lemon	Turkey	2016
	Acetamiprid	0.013	Orange	Turkey	2016
	Aldicarb	0.012	Grapefruit	Turkey	2016
	Aldicarb	0.013	Apple	Poland	2016
	Aldicarb	0.011	Pear	Belgium	2016
	Aldicarb	0.011	Pear	Poland	2016
	Aldicarb	0.012	Pear	Poland	2016
	Aldicarb	0.011	Lemon	Turkey	2016
	Aldicarb	0.013	Lemon	Turkey	2016
	Aldicarb	0.012	Mandarin	Turkey	2016
	Aldicarb	0.011	Mandarin	Turkey	2016
	Aldicarb	0.011	Orange	Spain	2016
	Aldicarb	0.013	Orange	Turkey	2016
	Amitraz	0.01	Apple	Serbia	2016
	Amitraz	0.042	Apple	Serbia	2016
	Amitraz	0.01	Apple	Serbia	2016
	Amitraz	0.018	Pear	Serbia	2016
	Amitraz	0.01	Grapefruit	Turkey	2016
	Amitraz	0.038	Pear	Belgium	2016
	Atrazine	0.014	Mandarin	Spain	2016
	Atrazine	0.014	Orange	Spain	2016
	Azinphos-methyl	0.012	Apple	Serbia	2016
	Azoxystrobin	0.022	Raspberry	Serbia	2016
	Boscalid	0.012	Apple	Serbia	2016
	Boscalid	0.017	Apple	Serbia	2016
	Boscalid	0.011	Apple	Serbia	2016
	Boscalid	0.022	Apple	Serbia	2016
	Boscalid	0.01	Apple	Serbia	2016
	Boscalid	0.017	Apple	Serbia	2016
	Boscalid	0.031	Apple	Serbia	2016
	Boscalid	0.017	Apple	Serbia	2016
	Boscalid	0.054	Apple	Serbia	2016
	Boscalid	0.145	Apple	Serbia	2016
	Boscalid	0.017	Apple	Serbia	2016
	Boscalid	0.074	Apple	Serbia	2016
	Boscalid	0.048	Pear	Serbia	2016
	Boscalid	0.042	Pear	Serbia	2016
	Boscalid	0.023	Pear	Serbia	2016
	Boscalid	0.092	Sweet cherry	Serbia	2016
	Boscalid	0.044	Pear	Serbia	2016
	Boscalid	0.094	Apple	Serbia	2016
	Boscalid	0.081	Apple	Poland	2016
	Boscalid	0.117	Apple	Hungary	2016
	Boscalid	0.033	Apple	Poland	2016
	Boscalid	0.213	Pear	Poland	2016
	Boscalid	0.032	Pear	The Netherlands	2016
	Boscalid	0.289	Pear	Belgium	2016
	Boscalid	0.023	Pear	Poland	2016
	Boscalid	0.073	Pear	Italy	2016
	Buprofezin	0.131	Lemon	Turkey	2016
	Buprofezin	0.036	Lemon	Turkey	2016
	Buprofezin	0.016	Lemon	Turkey	2016
	Buprofezin	0.089	Lemon	Turkey	2016
	Buprofezin	0.079	Lemon	Turkey	2016
	Buprofezin	0.083	Lemon	Turkey	2016
	Buprofezin	0.022	Lemon	Turkey	2016
	Buprofezin	0.011	Lemon	Turkey	2016
	Buprofezin	0.052	Mandarin	Turkey	2016
	Buprofezin	0.019	Mandarin	Turkey	2016
	Carbendazim	0.038	Peach	Serbia	2016
	Carbendazim	0.033	Apple	Serbia	2016
	Carbendazim	0.01	Apple	Serbia	2016
	Carbendazim	0.042	Apple	Serbia	2016
	Carbendazim	0.042	Apple	Serbia	2016
	Carbendazim	0.097	Apple	Serbia	2016
	Carbendazim	0.085	Apple	Serbia	2016
	Carbendazim	0.024	Apple	Serbia	2016
	Carbendazim	0.101	Apple	Serbia	2016
	Carbendazim	0.106	Apple	Serbia	2016
	Carbendazim	0.01	Apple	Serbia	2016
	Carbendazim	0.146	Apple	Serbia	2016
	Carbendazim	0.01	Apple	Serbia	2016
	Carbendazim	0.426	Pear	Serbia	2016
	Carbendazim	0.479	Pear	Serbia	2016
	Carbendazim	0.011	Pear	Serbia	2016
	Carbendazim	0.01	Plum	Serbia	2016
	Carbendazim	0.025	Grapefruit	Turkey	2016
	Carbendazim	0.019	Apple	Poland	2016
	Carbendazim	0.13	Apple	North Macedonia	2016
	Carbendazim	0.017	Apple	Poland	2016
	Carbendazim	0.021	Apple	Poland	2016
	Carbendazim	0.056	Pear	Poland	2016
	Carbendazim	0.011	Lemon	Turkey	2016
	Carbendazim	0.02	Mandarin	Turkey	2016
	Carbendazim	0.094	Orange	Turkey	2016
	Carfentrazone-ethyl	0.01	Lemon	Turkey	2016
	Chlorpyrifos	0.023	Apple	Serbia	2016
	Chlorpyrifos	0.025	Apple	Serbia	2016
	Chlorpyrifos	0.186	Grapefruit	Turkey	2016
	Chlorpyrifos	0.193	Grapefruit	Turkey	2016
	Chlorpyrifos	0.235	Grapefruit	Turkey	2016
	Chlorpyrifos	0.056	Grapefruit	Turkey	2016
	Chlorpyrifos	0.034	Grapefruit	Turkey	2016
	Chlorpyrifos	0.02	Lemon	Turkey	2016
	Chlorpyrifos	0.168	Lemon	Turkey	2016
	Chlorpyrifos	0.165	Lemon	Turkey	2016
	Chlorpyrifos	0.018	Mandarin	Turkey	2016
	Chlorpyrifos	0.072	Mandarin	Spain	2016
	Chlorpyrifos	0.02	Orange	Spain	2016
	Chlorpyrifos	0.018	Orange	Turkey	2016
	Chlorpyrifos	0.156	Orange	Turkey	2016
	Chlorpyrifos-methyl	0.944	Mandarin	Spain	2016
	Clothianidin	0.021	Pear	Serbia	2016
	Clothianidin	0.02	Pear	Serbia	2016
	Clothianidin	0.017	Pear	Belgium	2016
	Cyprodinil	0.015	Apple	Poland	2016
	Cyprodinil	0.023	Pear	The Netherlands	2016
	Cyprodinil	0.032	Pear	Poland	2016
	Cyprodinil	0.035	Pear	Belgium	2016
	Difenoconazole	0.015	Apple	Serbia	2016
	Difenoconazole	0.01	Pear	Serbia	2016
	Difenoconazole	0.02	Pear	Poland	2016
	Difenoconazole	0.021	Pear	Belgium	2016
	Dimethoate	0.034	Sour cherry	Serbia	2016
	Dinotefuran	0.01	Apple	Poland	2016
	Dinotefuran	0.01	Apple	Poland	2016
	Emamectin B1b	0.011	Pear	Poland	2016
	Ethofumesate	0.027	Lemon	Turkey	2016
	Fenpyroximate	0.016	Apple	Poland	2016
	Flonicamid	0.013	Apple	Poland	2016
	Flonicamid	0.01	Mandarin	Turkey	2016
	Fludioxonil	0.026	Apple	Poland	2016
	Fludioxonil	0.024	Apple	Poland	2016
	Fludioxonil	5.984	Pear	Poland	2016
	Fludioxonil	3.716	Pear	The Netherlands	2016
	Fludioxonil	0.336	Pear	Poland	2016
	Fludioxonil	3.391	Pear	Poland	2016
	Fludioxonil	1.703	Pear	The Netherlands	2016
	Fludioxonil	0.336	Pear	Poland	2016
	Fludioxonil	0.049	Pear	Belgium	2016
	Fluoxastrobin	0.013	Orange	Spain	2016
	Hexythiazox	0.013	Orange	Turkey	2016
	Imazalil	0.01	Grapes	Serbia	2016
	Imazalil	0.01	Apple	Serbia	2016
	Imazalil	0.01	Apricot	Serbia	2016
	Imazalil	0.01	Apple	Serbia	2016
	Imazalil	30.14	Grapefruit	Turkey	2016
	Imazalil	0.814	Grapefruit	Turkey	2016
	Imazalil	93.87	Grapefruit	Turkey	2016
	Imazalil	4.262	Grapefruit	Turkey	2016
	Imazalil	2.616	Grapefruit	Turkey	2016
	Imazalil	1.27	Grapefruit	Turkey	2016
	Imazalil	0.192	Grapefruit	Turkey	2016
	Imazalil	0.901	Grapefruit	Turkey	2016
	Imazalil	0.241	Grapefruit	Turkey	2016
	Imazalil	1.398	Grapefruit	Turkey	2016
	Imazalil	0.201	Apple	Bulgaria	2016
	Imazalil	0.056	Apple	Poland	2016
	Imazalil	0.036	Apple	Poland	2016
	Imazalil	0.037	Apple	Poland	2016
	Imazalil	0.026	Apple	Poland	2016
	Imazalil	0.01	Apple	Poland	2016
	Imazalil	0.021	Pear	Poland	2016
	Imazalil	0.038	Pear	Poland	2016
	Imazalil	0.056	Pear	The Netherlands	2016
	Imazalil	0.128	Pear	Belgium	2016
	Imazalil	0.083	Pear	Poland	2016
	Imazalil	0.124	Pear	Poland	2016
	Imazalil	0.162	Pear	The Netherlands	2016
	Imazalil	0.093	Pear	Poland	2016
	Imazalil	1.176	Pear	Poland	2016
	Imazalil	0.176	Lemon	Turkey	2016
	Imazalil	0.568	Lemon	Turkey	2016
	Imazalil	0.154	Lemon	Turkey	2016
	Imazalil	0.028	Lemon	Turkey	2016
	Imazalil	18.141	Lemon	Turkey	2016
	Imazalil	0.087	Lemon	Turkey	2016
	Imazalil	16.042	Lemon	Turkey	2016
	Imazalil	0.366	Lemon	Turkey	2016
	Imazalil	0.403	Lemon	Turkey	2016
	Imazalil	0.034	Lemon	Turkey	2016
	Imazalil	0.691	Lemon	Turkey	2016
	Imazalil	0.144	Lemon	Turkey	2016
	Imazalil	0.124	Mandarin	Turkey	2016
	Imazalil	4.847	Mandarin	Turkey	2016
	Imazalil	11.499	Mandarin	Turkey	2016
	Imazalil	4.247	Mandarin	Turkey	2016
	Imazalil	0.242	Mandarin	Turkey	2016
	Imazalil	1.401	Mandarin	Turkey	2016
	Imazalil	1.228	Mandarin	Turkey	2016
	Imazalil	0.013	Mandarin	Turkey	2016
	Imazalil	0.169	Mandarin	Turkey	2016
	Imazalil	17.04	Mandarin	Spain	2016
	Imazalil	2.812	Orange	Spain	2016
	Imazalil	0.102	Orange	Turkey	2016
	Imazalil	28.916	Orange	Spain	2016
	Imazalil	26.43	Orange	Turkey	2016
	Imazalil	0.667	Orange	Turkey	2016
	Imazalil	0.65	Orange	Turkey	2016
	Imidacloprid	0.01	Apple	Serbia	2016
	Imidacloprid	0.019	Apple	Serbia	2016
	Imidacloprid	0.01	Apple	Serbia	2016
	Imidacloprid	0.019	Apple	Serbia	2016
	Imidacloprid	0.022	Apple	Serbia	2016
	Imidacloprid	0.025	Apple	Serbia	2016
	Imidacloprid	0.021	Apple	Serbia	2016
	Imidacloprid	0.017	Apple	Serbia	2016
	Imidacloprid	0.013	Apple	Serbia	2016
	Imidacloprid	0.019	Pear	Serbia	2016
	Imidacloprid	0.026	Pear	Serbia	2016
	Imidacloprid	0.02	Apple	Serbia	2016
	Imidacloprid	0.038	Apple	Serbia	2016
	Imidacloprid	0.024	Grapefruit	Turkey	2016
	Imidacloprid	0.026	Mandarin	Croatia	2016
	Indoxacarb	0.01	Apple	Serbia	2016
	Indoxacarb	0.011	Apple	Serbia	2016
	Indoxacarb	0.014	Apple	Poland	2016
	Lufenuron	0.014	Grapefruit	Turkey	2016
	Lufenuron	0.013	Grapefruit	Turkey	2016
	Lufenuron	0.013	Grapefruit	Turkey	2016
	Lufenuron	0.032	Apple	Bulgaria	2016
	Lufenuron	0.013	Apple	North Macedonia	2016
	Lufenuron	0.013	Apple	Poland	2016
	Lufenuron	0.013	Apple	Poland	2016
	Lufenuron	0.012	Apple	Poland	2016
	Lufenuron	0.032	Apple	Poland	2016
	Lufenuron	0.012	Pear	Belgium	2016
	Lufenuron	0.017	Pear	The Netherlands	2016
	Lufenuron	0.012	Pear	Italy	2016
	Lufenuron	0.013	Pear	Belgium	2016
	Lufenuron	0.011	Lemon	Turkey	2016
	Lufenuron	0.027	Lemon	Turkey	2016
	Lufenuron	0.015	Lemon	Turkey	2016
	Lufenuron	0.042	Mandarin	Turkey	2016
	Mepronil	0.026	Grapefruit	Turkey	2016
	Metalaxyl	0.04	Grapes	Serbia	2016
	Metalaxyl	0.01	Grapes	Serbia	2016
	Metalaxyl-M	0.052	Grapes	Serbia	2016
	Metalaxyl-M	0.01	Grapes	Serbia	2016
	Methamidophos	0.01	Apple	Serbia	2016
	Methamidophos	0.016	Grapefruit	Turkey	2016
	Methamidophos	0.01	Apple	North Macedonia	2016
	Methamidophos	0.01	Apple	Hungary	2016
	Methamidophos	0.01	Apple	Poland	2016
	Methamidophos	0.013	Pear	Poland	2016
	Methamidophos	0.01	Mandarin	Turkey	2016
	Methamidophos	0.01	Mandarin	Turkey	2016
	Methamidophos	0.01	Orange	Spain	2016
	Methamidophos	0.02	Orange	Turkey	2016
	Methoxyfenozide	0.01	Apple	Poland	2016
	Methoxyfenozide	0.054	Apple	Poland	2016
	Methoxyfenozide	0.012	Apple	Poland	2016
	Myclobutanil	0.01	Apple	Serbia	2016
	Novaluron	0.013	Pear	Poland	2016
	Novaluron	0.01	Lemon	Turkey	2016
	Novaluron	0.01	Mandarin	Turkey	2016
	Novaluron	0.013	Mandarin	Spain	2016
	Novaluron	0.013	Orange	Spain	2016
	Pirimicarb	0.017	Apple	Poland	2016
	Pirimicarb	0.024	Apple	Hungary	2016
	Prochloraz	0.412	Grapefruit	Turkey	2016
	Prochloraz	0.417	Grapefruit	Turkey	2016
	Prochloraz	0.22	Grapefruit	Turkey	2016
	Prochloraz	0.155	Grapefruit	Turkey	2016
	Prochloraz	0.214	Lemon	Turkey	2016
	Prochloraz	0.401	Lemon	Turkey	2016
	Prochloraz	0.195	Lemon	Turkey	2016
	Prochloraz	0.536	Lemon	Turkey	2016
	Prochloraz	0.447	Lemon	Turkey	2016
	Prochloraz	0.644	Lemon	Turkey	2016
	Prochloraz	0.444	Mandarin	Turkey	2016
	Prochloraz	0.788	Mandarin	Turkey	2016
	Prochloraz	0.482	Mandarin	Turkey	2016
	Prochloraz	0.253	Orange	Turkey	2016
	Propiconazole	0.099	Grapefruit	Turkey	2016
	Propiconazole	0.139	Grapefruit	Turkey	2016
	Propiconazole	0.013	Apple	Poland	2016
	Propiconazole	0.022	Lemon	Turkey	2016
	Propiconazole	0.201	Lemon	Turkey	2016
	Propiconazole	0.354	Lemon	Turkey	2016
	Propiconazole	0.036	Mandarin	Turkey	2016
	Propiconazole	0.135	Orange	Turkey	2016
	Prothioconazole	0.028	Grapefruit	Turkey	2016
	Prothioconazole	0.013	Apple	Poland	2016
	Prothioconazole	0.01	Orange	Turkey	2016
	Pyraclostrobin	0.021	Apple	Poland	2016
	Pyraclostrobin	0.029	Apple	Hungary	2016
	Pyraclostrobin	0.093	Pear	Poland	2016
	Pyraclostrobin	0.012	Pear	The Netherlands	2016
	Pyraclostrobin	0.153	Pear	Belgium	2016
	Pyraclostrobin	0.03	Pear	Italy	2016
	Pyridaben	0.028	Grapefruit	Turkey	2016
	Pyridaben	0.016	Mandarin	Turkey	2016
	Pyrimethanil	0.01	Grapes	Serbia	2016
	Pyrimethanil	0.024	Apple	Serbia	2016
	Pyrimethanil	0.028	Apple	Serbia	2016
	Pyrimethanil	0.06	Apple	Serbia	2016
	Pyrimethanil	0.06	Apple	Serbia	2016
	Pyrimethanil	0.01	Apple	Serbia	2016
	Pyrimethanil	0.028	Grapefruit	Turkey	2016
	Pyrimethanil	0.016	Lemon	Turkey	2016
	Pyrimethanil	0.017	Lemon	Turkey	2016
	Pyrimethanil	0.027	Lemon	Turkey	2016
	Pyrimethanil	0.487	Lemon	Turkey	2016
	Pyrimethanil	0.847	Lemon	Turkey	2016
	Pyrimethanil	0.016	Mandarin	Turkey	2016
	Pyrimethanil	0.572	Mandarin	Turkey	2016
	Pyrimethanil	0.218	Mandarin	Turkey	2016
	Pyrimethanil	0.017	Mandarin	Turkey	2016
	Pyrimethanil	0.627	Orange	Turkey	2016
	Pyriproxyfen	0.016	Grapefruit	Turkey	2016
	Pyriproxyfen	0.028	Grapefruit	Turkey	2016
	Pyriproxyfen	0.023	Grapefruit	Turkey	2016
	Pyriproxyfen	0.012	Grapefruit	Turkey	2016
	Pyriproxyfen	0.042	Lemon	Turkey	2016
	Pyriproxyfen	0.108	Lemon	Turkey	2016
	Pyriproxyfen	0.036	Lemon	Turkey	2016
	Pyriproxyfen	0.034	Lemon	Turkey	2016
	Pyriproxyfen	0.027	Lemon	Turkey	2016
	Pyriproxyfen	0.019	Mandarin	Turkey	2016
	Pyriproxyfen	0.042	Mandarin	Spain	2016
	Pyriproxyfen	0.014	Orange	Turkey	2016
	Spinetoram B	0.014	Mandarin	Turkey	2016
	Spirodiclofen	0.051	Apple	Poland	2016
	Tebuconazole	0.025	Peach	Serbia	2016
	Tebuconazole	0.025	Apple	Serbia	2016
	Tebuconazole	0.077	Apple	Serbia	2016
	Tebuconazole	0.01	Apple	Serbia	2016
	Tebuconazole	0.047	Apple	Serbia	2016
	Tebuconazole	0.025	Pear	Serbia	2016
	Tebuconazole	0.034	Pear	Serbia	2016
	Tebuconazole	0.025	Plum	Serbia	2016
	Tebuconazole	0.025	Plum	Serbia	2016
	Tebuconazole	0.014	Apple	Poland	2016
	Tebuconazole	0.014	Apple	Poland	2016
	Tebuconazole	0.017	Apple	Poland	2016
	Tebuconazole	0.065	Lemon	Turkey	2016
	Tebufenozide	0.019	Pear	Belgium	2016
	Tebufenpyrad	0.061	Mandarin	Spain	2016
	Teflubenzuron	0.016	Apple	Poland	2016
	Teflubenzuron	0.011	Pear	Italy	2016
	Thiabendazole	0.467	Grapefruit	Turkey	2016
	Thiabendazole	0.063	Grapefruit	Turkey	2016
	Thiabendazole	0.099	Grapefruit	Turkey	2016
	Thiabendazole	0.05	Grapefruit	Turkey	2016
	Thiabendazole	0.039	Grapefruit	Turkey	2016
	Thiabendazole	3.348	Grapefruit	Turkey	2016
	Thiabendazole	1.076	Grapefruit	Turkey	2016
	Thiabendazole	0.014	Grapefruit	Turkey	2016
	Thiabendazole	0.085	Lemon	Turkey	2016
	Thiabendazole	0.133	Lemon	Turkey	2016
	Thiabendazole	0.042	Lemon	Turkey	2016
	Thiabendazole	0.068	Lemon	Turkey	2016
	Thiabendazole	0.021	Mandarin	Turkey	2016
	Thiabendazole	0.166	Mandarin	Turkey	2016
	Thiabendazole	0.08	Mandarin	Turkey	2016
	Thiabendazole	0.316	Orange	Turkey	2016
	Thiacloprid	0.012	Apple	Poland	2016
	Thiamethoxam	0.022	Pear	Serbia	2016
	Thiamethoxam	0.034	Pear	Belgium	2016
	Thiophanate-methyl	0.014	Peach	Serbia	2016
	Thiophanate-methyl	0.023	Apple	Serbia	2016
	Thiophanate-methyl	0.106	Pear	Serbia	2016
	Thiophanate-methyl	0.042	Pear	Serbia	2016
	Thiophanate-methyl	0.027	Grapefruit	Turkey	2016

## Sheet: 2017
Supplementary material 2
	Analyte	Value (mg/kg)	Matrix	Country	Year
		/	Ananas	Costa Rica	2017
		/	Ananas	Costa Rica	2017
		/	Ananas	Costa Rica	2017
		/	Ananas	Costa Rica	2017
		/	Avocado	Peru	2017
		/	Avocado	Kenya	2017
		/	Almond	The United States of America	2017
		/	Almond	The United States of America	2017
		/	Banana	Costa Rica	2017
		/	Banana	Costa Rica	2017
		/	Banana	Costa Rica	2017
		/	Banana	Ecuador	2017
		/	Banana	Mexico	2017
		/	Banana	Colombia	2017
		/	Banana	Colombia	2017
		/	Banana	Colombia	2017
		/	Banana	Ecuador	2017
		/	Banana	Ecuador	2017
		/	Banana	Ecuador	2017
		/	Banana	Costa Rica	2017
		/	Banana	Costa Rica	2017
		/	Banana	Colombia	2017
		/	Banana	Mexico	2017
		/	Banana	Mexico	2017
		/	Banana	Mexico	2017
		/	Banana	Mexico	2017
		/	Banana	Guatemala	2017
		/	Banana	Costa Rica	2017
		/	Banana	Colombia	2017
		/	Banana	Mexico	2017
		/	Peach	Italy	2017
		/	Peach	Greece	2017
		/	Peach	Greece	2017
		/	Peach	Greece	2017
		/	Peach	Greece	2017
		/	Peach	Greece	2017
		/	Peach	Greece	2017
		/	Peach	Greece	2017
		/	Peach	Greece	2017
		/	Peach	Greece	2017
		/	Peach	Greece	2017
		/	Peach	Greece	2017
		/	Peach	Greece	2017
		/	Peach	Greece	2017
		/	Peach	Greece	2017
		/	Peach	Spain	2017
		/	Peach	Greece	2017
		/	Peach	Greece	2017
		/	Grapefruit	South Africa	2017
		/	Grapefruit	Mexico	2017
		/	Grapefruit	Mexico	2017
		/	Grapes	North Macedonia	2017
		/	Grapes	Italy	2017
		/	Grapes	North Macedonia	2017
		/	Grapes	North Macedonia	2017
		/	Grapes	North Macedonia	2017
		/	Grapes	North Macedonia	2017
		/	Grapes	North Macedonia	2017
		/	Grapes	North Macedonia	2017
		/	Grapes	North Macedonia	2017
		/	Grapes	North Macedonia	2017
		/	Grapes	North Macedonia	2017
		/	Grapes	North Macedonia	2017
		/	Grapes	North Macedonia	2017
		/	Grapes	North Macedonia	2017
		/	Grapes	North Macedonia	2017
		/	Grapes	North Macedonia	2017
		/	Grapes	North Macedonia	2017
		/	Grapes	North Macedonia	2017
		/	Grapes	North Macedonia	2017
		/	Grapes	North Macedonia	2017
		/	Grapes	North Macedonia	2017
		/	Grapes	North Macedonia	2017
		/	Grapes	North Macedonia	2017
		/	Grapes	North Macedonia	2017
		/	Grapes	North Macedonia	2017
		/	Grapes	North Macedonia	2017
		/	Grapes	North Macedonia	2017
		/	Grapes	North Macedonia	2017
		/	Grapes	North Macedonia	2017
		/	Grapes	North Macedonia	2017
		/	Grapes	North Macedonia	2017
		/	Cashew	Vietnam	2017
		/	Apple	Poland	2017
		/	Apple	Albania	2017
		/	Apple	Poland	2017
		/	Apple	Poland	2017
		/	Apple	Serbia	2017
		/	Apple	Poland	2017
		/	Apple	Poland	2017
		/	Apple	Croatia	2017
		/	Apple	North Macedonia	2017
		/	Apple	North Macedonia	2017
		/	Apple	Poland	2017
		/	Apple	Poland	2017
		/	Apple	Poland	2017
		/	Apple	Poland	2017
		/	Apple	Poland	2017
		/	Apple	Poland	2017
		/	Apple	Poland	2017
		/	Apple	Poland	2017
		/	Apple	Poland	2017
		/	Apple	Poland	2017
		/	Apple	Poland	2017
		/	Apple	Poland	2017
		/	Apple	Poland	2017
		/	Apple	Poland	2017
		/	Apple	Poland	2017
		/	Apple	Albania	2017
		/	Apple	Poland	2017
		/	Apple	Poland	2017
		/	Apple	Poland	2017
		/	Apple	Poland	2017
		/	Apple	Poland	2017
		/	Apple	Poland	2017
		/	Apple	Poland	2017
		/	Apple	Poland	2017
		/	Apple	Albania	2017
		/	Apple	Albania	2017
		/	Apple	North Macedonia	2017
		/	Apple	Italy	2017
		/	Apple	Poland	2017
		/	Apple	Poland	2017
		/	Apple	Poland	2017
		/	Apple	North Macedonia	2017
		/	Apple	Poland	2017
		/	Apple	Poland	2017
		/	Apple	Poland	2017
		/	Apple	Poland	2017
		/	Apple	Italy	2017
		/	Apple	Italy	2017
		/	Apple	Italy	2017
		/	Apple	Albania	2017
		/	Apple	Poland	2017
		/	Apple	Croatia	2017
		/	Apple	Serbia	2017
		/	Apple	Serbia	2017
		/	Apple	Serbia	2017
		/	Apple	Serbia	2017
		/	Apple	Serbia	2017
		/	Apple	Greece	2017
		/	Strawberry	Poland	2017
		/	Japanese apple	Albania	2017
		/	Apricot	Greece	2017
		/	Apricot	Bulgaria	2017
		/	Apricot	Serbia	2017
		/	Peanut	Argentina	2017
		/	Peanut	China	2017
		/	Peanut	China	2017
		/	Kiwi	Greece	2017
		/	Kiwi	Italy	2017
		/	Kiwi	North Macedonia	2017
		/	Kiwi	Greece	2017
		/	Kiwi	Greece	2017
		/	Kiwi	Italy	2017
		/	Kiwi	Italy	2017
		/	Kiwi	Chile	2017
		/	Kiwi	Greece	2017
		/	Clementine	Turkey	2017
		/	Clementine	Spain	2017
		/	Clementine	Turkey	2017
		/	Clementine	Turkey	2017
		/	Pear	Greece	2017
		/	Pear	Poland	2017
		/	Pear	Poland	2017
		/	Pear	Italy	2017
		/	Pear	The Netherlands	2017
		/	Pear	Bosnia and Herzegovina	2017
		/	Pear	China	2017
		/	Kumquat	South Africa	2017
		/	Lemon	Argentina	2017
		/	Lemon	Argentina	2017
		/	Lemon	Argentina	2017
		/	Lemon	South Africa	2017
		/	Lemon	Argentina	2017
		/	Lemon	Argentina	2017
		/	Lemon	Argentina	2017
		/	Lemon	Argentina	2017
		/	Lemon	Argentina	2017
		/	Lemon	Argentina	2017
		/	Lemon	Argentina	2017
		/	Lemon	Turkey	2017
		/	Lemon	Argentina	2017
		/	Lemon	Argentina	2017
		/	Raspberry	Serbia	2017
		/	Mandarin	Croatia	2017
		/	Mandarin	Greece	2017
		/	Mandarin	Greece	2017
		/	Mandarin	Greece	2017
		/	Mandarin	Greece	2017
		/	Mandarin	Greece	2017
		/	Mandarin	Greece	2017
		/	Mandarin	Greece	2017
		/	Mandarin	Italy	2017
		/	Mandarin	Greece	2017
		/	Mandarin	Greece	2017
		/	Mandarin	Greece	2017
		/	Mandarin	Greece	2017
		/	Mandarin	Greece	2017
		/	Mandarin	Turkey	2017
		/	Mango	Brazil	2017
		/	Mango	Ivory Coast	2017
		/	Mango	Senegal	2017
		/	Pomegranate	Argentina	2017
		/	Pomegranate	Turkey	2017
		/	Peach (nectarine)	Spain	2017
		/	Peach (nectarine)	Greece	2017
		/	Peach (nectarine)	Greece	2017
		/	Peach (nectarine)	North Macedonia	2017
		/	Peach (nectarine)	Greece	2017
		/	Peach (nectarine)	Greece	2017
		/	Peach (nectarine)	Greece	2017
		/	Peach (nectarine)	Greece	2017
		/	Peach (nectarine)	Greece	2017
		/	Peach (nectarine)	Albania	2017
		/	Walnut	Russia	2017
		/	Walnut	Russia	2017
		/	Pistachio	Turkey	2017
		/	Pomelo	China	2017
		/	Pomelo	China	2017
		/	Oragne	Greece	2017
		/	Oragne	Turkey	2017
		/	Oragne	Greece	2017
		/	Oragne	Egypt	2017
		/	Oragne	Egypt	2017
		/	Oragne	Egypt	2017
		/	Oragne	South Africa	2017
		/	Oragne	South Africa	2017
		/	Oragne	South Africa	2017
		/	Oragne	South Africa	2017
		/	Oragne	South Africa	2017
		/	Oragne	South Africa	2017
		/	Oragne	Uruguay	2017
		/	Oragne	Zimbabwe	2017
		/	Oragne	Zimbabwe	2017
		/	Oragne	Uruguay	2017
		/	Oragne	South Africa	2017
		/	Oragne	South Africa	2017
		/	Oragne	Greece	2017
		/	Oragne	Greece	2017
		/	Oragne	Greece	2017
		/	Oragne	Greece	2017
		/	Oragne	Greece	2017
		/	Oragne	Greece	2017
		/	Oragne	Greece	2017
		/	Oragne	Greece	2017
		/	Oragne	Greece	2017
		/	Oragne	Greece	2017
		/	Oragne	Greece	2017
		/	Oragne	Greece	2017
		/	Oragne	Greece	2017
		/	Plum	Greece	2017
		/	Plum	Albania	2017
		/	Plum	Albania	2017
		/	Plum	Albania	2017
		/	Sweet cherry	Greece	2017
		/	Sour cherry	Serbia	2017
		/	Sour cherry	Hungary	2017
		/	Sour cherry	Hungary	2017
		/	Sour cherry	Hungary	2017
		/	Sour cherry	Hungary	2017
		/	Sour cherry	Hungary	2017
		/	Date palm	Iran	2017
	Abamectin	0.01	Lemon	Turkey	2017
	Abamectin	0.01	Lemon	Turkey	2017
	Acetamiprid	0.486	Grapefruit	Turkey	2017
	Acetamiprid	0.218	Grapefruit	Turkey	2017
	Acetamiprid	0.535	Grapefruit	Turkey	2017
	Acetamiprid	0.014	Grapefruit	Turkey	2017
	Acetamiprid	0.039	Grapefruit	Turkey	2017
	Acetamiprid	0.016	Grapefruit	Turkey	2017
	Acetamiprid	0.321	Grapefruit	Turkey	2017
	Acetamiprid	0.029	Grapefruit	Turkey	2017
	Acetamiprid	0.037	Grapefruit	Turkey	2017
	Acetamiprid	0.337	Grapefruit	Turkey	2017
	Acetamiprid	0.032	Grapefruit	Turkey	2017
	Acetamiprid	0.198	Grapes	Turkey	2017
	Acetamiprid	0.024	Apple	Poland	2017
	Acetamiprid	0.013	Apple	Poland	2017
	Acetamiprid	0.021	Apple	Poland	2017
	Acetamiprid	0.026	Apple	Poland	2017
	Acetamiprid	0.022	Apple	Poland	2017
	Acetamiprid	0.013	Apple	Poland	2017
	Acetamiprid	0.024	Apple	Poland	2017
	Acetamiprid	0.012	Apple	Poland	2017
	Acetamiprid	0.016	Apple	Greece	2017
	Acetamiprid	0.034	Apple	Croatia	2017
	Acetamiprid	0.027	Apple	Poland	2017
	Acetamiprid	0.014	Apple	Poland	2017
	Acetamiprid	0.033	Apple	Poland	2017
	Acetamiprid	0.032	Apple	Serbia	2017
	Acetamiprid	0.034	Apple	Serbia	2017
	Acetamiprid	0.023	Apple	Serbia	2017
	Acetamiprid	0.027	Apple	Serbia	2017
	Acetamiprid	0.012	Clementine	Egypt	2017
	Acetamiprid	0.044	Lemon	Turkey	2017
	Acetamiprid	0.011	Lemon	Turkey	2017
	Acetamiprid	0.014	Mandarin	Turkey	2017
	Acetamiprid	0.022	Peach (nectarine)	Spain	2017
	Acetamiprid	0.121	Peach (nectarine)	Serbia	2017
	Acetamiprid	0.02	Oragne	Turkey	2017
	Acetamiprid	0.021	Oragne	Turkey	2017
	Acetamiprid	0.083	Oragne	Italy	2017
	Acetamiprid	0.012	Plum	Serbia	2017
	Acetamiprid	0.043	Sweet cherry	Greece	2017
	Acetamiprid	0.01	Sweet cherry	Greece	2017
	Acetamiprid	0.062	Sweet cherry	Serbia	2017
	Acetamiprid	0.026	Sour cherry	Serbia	2017
	Acibenzolar-S-methyl	0.011	Mandarin	Albania	2017
	Aldicarb	0.011	Grapefruit	Cyprus	2017
	Aldicarb	0.013	Grapefruit	Turkey	2017
	Aldicarb	0.018	Apple	Albania	2017
	Aldicarb	0.014	Pear	The Netherlands	2017
	Aldicarb	0.011	Lemon	Turkey	2017
	Aldicarb	0.011	Lemon	Turkey	2017
	Aldicarb	0.012	Lemon	Turkey	2017
	Aldicarb	0.014	Lemon	Turkey	2017
	Aldicarb	0.011	Lemon	South Africa	2017
	Aldicarb	0.012	Mandarin	Spain	2017
	Aldicarb	0.011	Oragne	Spain	2017
	Aldicarb	0.011	Oragne	Spain	2017
	Aldicarb	0.011	Oragne	Turkey	2017
	Aldicarb	0.012	Oragne	Greece	2017
	Aldicarb	0.016	Oragne	Turkey	2017
	Aldicarb	0.01	Plum	Serbia	2017
	Aldicarb sulfone	0.01	Mandarin	Turkey	2017
	Aldicarb sulfone	0.01	Mandarin	Turkey	2017
	Amitraz	0.015	Ananas	Costa Rica	2017
	Amitraz	0.02	Banana	Costa Rica	2017
	Amitraz	0.023	Grapefruit	Turkey	2017
	Amitraz	0.024	Grapefruit	Turkey	2017
	Amitraz	0.023	Grapefruit	Turkey	2017
	Amitraz	0.011	Apple	Poland	2017
	Amitraz	0.011	Apple	Poland	2017
	Amitraz	0.011	Apple	Poland	2017
	Amitraz	0.011	Apple	Poland	2017
	Amitraz	0.011	Apple	Poland	2017
	Amitraz	0.011	Apple	Poland	2017
	Amitraz	0.011	Apple	Poland	2017
	Amitraz	0.011	Apple	Poland	2017
	Amitraz	0.032	Apple	Poland	2017
	Amitraz	0.017	Apple	Italy	2017
	Amitraz	0.018	Apple	Poland	2017
	Amitraz	0.02	Apple	Poland	2017
	Amitraz	0.014	Apple	Greece	2017
	Amitraz	0.018	Clementine	Italy	2017
	Amitraz	0.01	Pear	Turkey	2017
	Amitraz	0.015	Lemon	Turkey	2017
	Amitraz	0.01	Lemon	Turkey	2017
	Amitraz	0.014	Lemon	Turkey	2017
	Amitraz	0.014	Lemon	Argentina	2017
	Amitraz	0.029	Mandarin	Greece	2017
	Amitraz	0.022	Pomegranate	Peru	2017
	Amitraz	0.016	Pomelo	China	2017
	Amitraz	0.011	Oragne	Greece	2017
	Amitraz	0.015	Oragne	Greece	2017
	Amitraz	0.014	Oragne	Greece	2017
	Amitraz	0.035	Oragne	Turkey	2017
	Azoxystrobin	0.523	Banana	Costa Rica	2017
	Azoxystrobin	0.043	Banana	Guatemala	2017
	Azoxystrobin	0.169	Banana	Mexico	2017
	Azoxystrobin	0.225	Strawberry	Greece	2017
	Azoxystrobin	0.029	Strawberry	Spain	2017
	Azoxystrobin	0.068	Strawberry	Greece	2017
	Azoxystrobin	0.251	Strawberry	Serbia	2017
	Azoxystrobin	0.054	Strawberry	Serbia	2017
	Azoxystrobin	0.197	Lemon	Argentina	2017
	Azoxystrobin	0.192	Lemon	Argentina	2017
	Azoxystrobin	0.473	Lemon	Argentina	2017
	Azoxystrobin	0.011	Oragne	Zimbabwe	2017
	Azoxystrobin	0.012	Oragne	Turkey	2017
	Bendiocarb	0.01	Apricot	Italy	2017
	Bifenthrin	0.01	Apple	Poland	2017
	Bitertanol	0.152	Avocado	Peru	2017
	Bitertanol	0.014	Grapefruit	Turkey	2017
	Bitertanol	0.021	Grapefruit	Turkey	2017
	Bitertanol	0.014	Oragne	Turkey	2017
	Bitertanol	0.012	Oragne	Turkey	2017
	Boscalid	0.024	Peach	Greece	2017
	Boscalid	0.019	Peach	Serbia	2017
	Boscalid	0.023	Grapes	Bosnia and Herzegovina	2017
	Boscalid	0.107	Grapes	Turkey	2017
	Boscalid	0.165	Grapes	Turkey	2017
	Boscalid	0.018	Grapes	North Macedonia	2017
	Boscalid	0.158	Grapes	Italy	2017
	Boscalid	0.066	Grapes	Turkey	2017
	Boscalid	0.025	Apple	Poland	2017
	Boscalid	0.112	Apple	Poland	2017
	Boscalid	0.102	Apple	Poland	2017
	Boscalid	0.016	Apple	Italy	2017
	Boscalid	0.015	Apple	Italy	2017
	Boscalid	0.026	Apple	Italy	2017
	Boscalid	0.025	Apple	Croatia	2017
	Boscalid	0.012	Apple	Poland	2017
	Boscalid	0.018	Apple	Poland	2017
	Boscalid	0.012	Apple	Poland	2017
	Boscalid	0.092	Apple	Italy	2017
	Boscalid	0.12	Apple	Croatia	2017
	Boscalid	0.077	Apple	Italy	2017
	Boscalid	0.09	Apple	Italy	2017
	Boscalid	0.04	Apple	Serbia	2017
	Boscalid	0.018	Strawberry	Greece	2017
	Boscalid	0.013	Strawberry	Spain	2017
	Boscalid	0.022	Strawberry	Greece	2017
	Boscalid	0.046	Strawberry	Serbia	2017
	Boscalid	0.048	Strawberry	Serbia	2017
	Boscalid	0.151	Strawberry	Serbia	2017
	Boscalid	0.032	Strawberry	Serbia	2017
	Boscalid	0.141	Strawberry	Serbia	2017
	Boscalid	0.509	Strawberry	Serbia	2017
	Boscalid	0.017	Strawberry	Serbia	2017
	Boscalid	0.141	Pear	Italy	2017
	Boscalid	0.01	Hazelnut	Croatia	2017
	Boscalid	0.021	Lemon	Turkey	2017
	Boscalid	0.018	Plum	Moldova	2017
	Boscalid	0.054	Plum	Serbia	2017
	Boscalid	0.039	Sweet cherry	Greece	2017
	Boscalid	0.024	Sweet cherry	Romania	2017
	Buprofezin	0.072	Grapefruit	Turkey	2017
	Buprofezin	0.024	Grapefruit	Turkey	2017
	Buprofezin	0.115	Grapefruit	Turkey	2017
	Buprofezin	0.08	Grapefruit	Turkey	2017
	Buprofezin	0.018	Grapefruit	Turkey	2017
	Buprofezin	0.062	Grapefruit	Turkey	2017
	Buprofezin	0.077	Grapefruit	Turkey	2017
	Buprofezin	0.06	Lemon	Turkey	2017
	Buprofezin	0.012	Lemon	Turkey	2017
	Buprofezin	0.039	Lemon	Turkey	2017
	Buprofezin	0.016	Lemon	Turkey	2017
	Buprofezin	0.016	Oragne	Spain	2017
	Buprofezin	0.022	Oragne	Turkey	2017
	Carbaryl	0.01	Grapefruit	Turkey	2017
	Carbaryl	0.01	Grapefruit	Turkey	2017
	Carbaryl	0.01	Grapefruit	Turkey	2017
	Carbaryl	0.01	Grapefruit	Turkey	2017
	Carbaryl	0.01	Grapefruit	Turkey	2017
	Carbaryl	0.01	Grapefruit	Turkey	2017
	Carbaryl	0.01	Grapefruit	Israel	2017
	Carbaryl	0.01	Mandarin	Turkey	2017
	Carbaryl	0.01	Oragne	Spain	2017
	Carbaryl	0.01	Oragne	Turkey	2017
	Carbaryl	0.01	Oragne	Turkey	2017
	Carbaryl	0.01	Oragne	Turkey	2017
	Carbaryl	0.01	Oragne	Turkey	2017
	Carbaryl	0.01	Oragne	Spain	2017
	Carbaryl	0.01	Oragne	Spain	2017
	Carbaryl	0.01	Oragne	Spain	2017
	Carbendazim	0.058	Grapefruit	Turkey	2017
	Carbendazim	0.061	Grapefruit	Turkey	2017
	Carbendazim	0.194	Grapefruit	Turkey	2017
	Carbendazim	0.036	Apple	Poland	2017
	Carbendazim	0.152	Apple	Poland	2017
	Carbendazim	0.024	Apple	Poland	2017
	Carbendazim	0.01	Apple	Poland	2017
	Carbendazim	0.185	Apple	Poland	2017
	Carbendazim	0.13	Apple	Greece	2017
	Carbendazim	0.034	Apple	Greece	2017
	Carbendazim	0.018	Apple	Italy	2017
	Carbendazim	0.03	Apple	Albania	2017
	Carbendazim	0.4	Apple	Poland	2017
	Carbendazim	0.026	Apple	Poland	2017
	Carbendazim	0.149	Apple	Serbia	2017
	Carbendazim	0.011	Apple	Serbia	2017
	Carbendazim	0.09	Apple	Serbia	2017
	Carbendazim	0.026	Strawberry	Poland	2017
	Carbendazim	0.016	Pear	Turkey	2017
	Carbendazim	0.038	Lemon	Turkey	2017
	Carbendazim	0.031	Lemon	Turkey	2017
	Carbendazim	0.046	Lemon	Turkey	2017
	Carbendazim	0.023	Lemon	Turkey	2017
	Carbendazim	0.055	Lemon	Turkey	2017
	Carbendazim	0.12	Lemon	Turkey	2017
	Carbendazim	0.028	Lemon	Turkey	2017
	Carbendazim	0.064	Lemon	Turkey	2017
	Carbendazim	0.013	Lemon	Turkey	2017
	Carbendazim	0.346	Lemon	Turkey	2017
	Carbendazim	0.219	Lemon	Turkey	2017
	Carbendazim	0.029	Lemon	Turkey	2017
	Carbendazim	0.242	Lemon	Turkey	2017
	Carbendazim	1.123	Lemon	Argentina	2017
	Carbendazim	0.254	Lemon	Argentina	2017
	Carbendazim	0.01	Lemon	Turkey	2017
	Carbendazim	0.012	Lemon	Turkey	2017
	Carbendazim	0.018	Mandarin	Turkey	2017
	Carbendazim	0.267	Mandarin	Turkey	2017
	Carbendazim	0.022	Peach (nectarine)	Belgium	2017
	Carbendazim	0.145	Peach (nectarine)	Serbia	2017
	Carbendazim	0.187	Oragne	Egypt	2017
	Carbendazim	0.971	Oragne	Turkey	2017
	Carbendazim	0.189	Oragne	Spain	2017
	Carbendazim	0.092	Oragne	Zimbabwe	2017
	Carbendazim	0.034	Plum	Serbia	2017
	Carbendazim	0.218	Sweet cherry	Romania	2017
	Carbendazim	0.099	Sweet cherry	Romania	2017
	Carfentrazone-ethyl	0.01	Oragne	Turkey	2017
	Carfentrazone-ethyl	0.01	Oragne	Turkey	2017
	Carfentrazone-ethyl	0.01	Oragne	Turkey	2017
	Chlorantraniliprole	0.041	Grapes	Turkey	2017
	Chlorantraniliprole	0.013	Apple	Poland	2017
	Chlorantraniliprole	0.01	Apple	Italy	2017
	Chlorantraniliprole	0.084	Apple	Hungary	2017
	Chlorantraniliprole	0.012	Apple	Hungary	2017
	Chlorantraniliprole	0.015	Apple	Italy	2017
	Chlorotoluron	0.01	Clementine	Spain	2017
	Chlorotoluron	0.01	Hazelnut	Croatia	2017
	Chlorotoluron	0.01	Mandarin	Turkey	2017
	Chlorotoluron	0.01	Oragne	Greece	2017
	Chlorotoluron	0.011	Oragne	Spain	2017
	Chlorpyrifos	0.299	Grapefruit	Cyprus	2017
	Chlorpyrifos	0.082	Grapefruit	Turkey	2017
	Chlorpyrifos	0.3	Grapefruit	Turkey	2017
	Chlorpyrifos	0.037	Grapefruit	Turkey	2017
	Chlorpyrifos	0.019	Grapefruit	Turkey	2017
	Chlorpyrifos	0.072	Lemon	Turkey	2017
	Chlorpyrifos	0.161	Lemon	Turkey	2017
	Chlorpyrifos	0.047	Lemon	Turkey	2017
	Chlorpyrifos	0.05	Lemon	Turkey	2017
	Chlorpyrifos	0.031	Lemon	Turkey	2017
	Chlorpyrifos	0.027	Mandarin	Cyprus	2017
	Chlorpyrifos	0.076	Mandarin	Turkey	2017
	Chlorpyrifos	0.233	Mandarin	Turkey	2017
	Chlorpyrifos	0.04	Mandarin	Turkey	2017
	Chlorpyrifos	0.022	Mandarin	Greece	2017
	Chlorpyrifos	0.019	Mandarin	Turkey	2017
	Chlorpyrifos	0.068	Mandarin	Turkey	2017
	Chlorpyrifos	0.056	Pomelo	China	2017
	Chlorpyrifos	0.156	Oragne	Greece	2017
	Chlorpyrifos	0.017	Oragne	Egypt	2017
	Chlorpyrifos	0.017	Oragne	Greece	2017
	Chlorpyrifos	0.038	Oragne	Turkey	2017
	Chlorpyrifos	0.103	Oragne	Turkey	2017
	Chlorpyrifos	0.049	Oragne	Turkey	2017
	Chlorpyrifos	0.04	Oragne	Turkey	2017
	Clofentezine	0.017	Apple	Croatia	2017
	Clofentezine	0.011	Mandarin	Greece	2017
	Clothianidin	0.025	Apple	Poland	2017
	Clothianidin	0.01	Apple	Poland	2017
	Clothianidin	0.017	Apple	Poland	2017
	Clothianidin	0.011	Strawberry	Greece	2017
	Clothianidin	0.019	Lemon	Spain	2017
	Clothianidin	0.016	Lemon	Turkey	2017
	Clothianidin	0.015	Oragne	Spain	2017
	Cymoxanil	0.015	Grapefruit	Turkey	2017
	Cymoxanil	0.022	Oragne	Turkey	2017
	Cymoxanil	0.023	Oragne	Turkey	2017
	Cymoxanil	0.019	Oragne	Spain	2017
	Cyprodinil	0.029	Peach	Italy	2017
	Cyprodinil	0.014	Grapes	Bosnia and Herzegovina	2017
	Cyprodinil	0.42	Grapes	Turkey	2017
	Cyprodinil	0.076	Grapes	Turkey	2017
	Cyprodinil	0.128	Apple	Poland	2017
	Cyprodinil	0.028	Apple	The Netherlands	2017
	Cyprodinil	0.606	Strawberry	Germany	2017
	Cyprodinil	0.11	Pear	The Netherlands	2017
	Cyprodinil	0.028	Pear	The Netherlands	2017
	Cyprodinil	0.011	Lemon	Turkey	2017
	Cyprodinil	0.089	Sweet cherry	Romania	2017
	Cyprodinil	0.06	Sweet cherry	Romania	2017
	Difenoconazole	0.011	Apple	Poland	2017
	Difenoconazole	0.013	Apple	Greece	2017
	Difenoconazole	0.07	Apple	Hungary	2017
	Difenoconazole	0.012	Apple	Serbia	2017
	Difenoconazole	0.1	Lemon	Turkey	2017
	Difenoconazole	0.1	Mandarin	Turkey	2017
	Diflubenzuron	0.073	Apple	Poland	2017
	Diflubenzuron	0.027	Apple	Poland	2017
	Diflubenzuron	0.011	Apple	Turkey	2017
	Dimethoate	0.047	Apple	Poland	2017
	Dimethoate	0.01	Oragne	Greece	2017
	Dimethomorph	0.041	Grapes	Italy	2017
	Dimethomorph	0.067	Strawberry	Spain	2017
	Dimethomorph	0.01	Lemon	Turkey	2017
	Dimethomorph	0.01	Mandarin	Greece	2017
	Dimethomorph	0.011	Mandarin	Albania	2017
	Dimethomorph	0.011	Oragne	Turkey	2017
	Dimethomorph	0.011	Oragne	Turkey	2017
	Dimethomorph	0.011	Oragne	Turkey	2017
	Dimethomorph	0.011	Oragne	Greece	2017
	Dimethomorph	0.013	Oragne	Turkey	2017
	Dimethomorph	0.022	Oragne	Turkey	2017
	Dimoxystrobin	0.01	Grapefruit	Turkey	2017
	Dimoxystrobin	0.01	Grapefruit	Turkey	2017
	Dimoxystrobin	0.01	Grapefruit	Turkey	2017
	Dimoxystrobin	0.01	Grapefruit	Turkey	2017
	Dimoxystrobin	0.01	Grapefruit	Turkey	2017
	Dimoxystrobin	0.01	Grapefruit	Turkey	2017
	Dinotefuran	0.01	Apple	Turkey	2017
	Dinotefuran	0.01	Apple	Albania	2017
	Dinotefuran	0.01	Pear	Italy	2017
	Dinotefuran	0.01	Mandarin	Turkey	2017
	Dinotefuran	0.01	Mandarin	Greece	2017
	Emamectin B1a	0.01	Grapes	Italy	2017
	Emamectin B1a	0.012	Oragne	Italy	2017
	Eprinomectin	0.01	Grapefruit	Turkey	2017
	Eprinomectin	0.01	Oragne	Greece	2017
	Ethiofencarb	0.01	Pear	Italy	2017
	Ethiofencarb	0.01	Mandarin	Turkey	2017
	Ethirimol	0.038	Apple	Italy	2017
	Ethofumesate	0.013	Banana	Costa Rica	2017
	Ethofumesate	0.01	Banana	Ecuador	2017
	Ethofumesate	0.018	Apple	Poland	2017
	Ethofumesate	0.011	Apple	Croatia	2017
	Ethofumesate	0.016	Apple	Italy	2017
	Ethofumesate	0.011	Lemon	Spain	2017
	Ethofumesate	0.022	Lemon	Turkey	2017
	Ethofumesate	0.038	Lemon	Turkey	2017
	Ethofumesate	0.016	Lemon	Turkey	2017
	Ethofumesate	0.021	Lemon	Turkey	2017
	Ethofumesate	0.022	Lemon	Turkey	2017
	Ethofumesate	0.025	Lemon	Turkey	2017
	Ethofumesate	0.024	Lemon	Turkey	2017
	Ethofumesate	0.014	Lemon	Turkey	2017
	Ethofumesate	0.011	Lemon	Argentina	2017
	Ethofumesate	0.024	Lemon	Argentina	2017
	Ethofumesate	0.012	Mandarin	Greece	2017
	Ethofumesate	0.023	Peach (nectarine)	Italy	2017
	Etoxazole	0.022	Grapefruit	Turkey	2017
	Etoxazole	0.01	Grapefruit	Turkey	2017
	Etoxazole	0.01	Lemon	Turkey	2017
	Etoxazole	0.011	Lemon	Turkey	2017
	Fenbuconazole	0.033	Peach (nectarine)	Spain	2017
	Fenhexamid	0.015	Grapefruit	Turkey	2017
	Fenhexamid	0.645	Grapes	Turkey	2017
	Fenhexamid	0.421	Strawberry	Spain	2017
	Fenhexamid	0.01	Lemon	Argentina	2017
	Fenhexamid	0.026	Peach (nectarine)	Spain	2017
	Fenhexamid	0.015	Oragne	Turkey	2017
	Fenhexamid	0.013	Oragne	Spain	2017
	Fenpropimorph	0.016	Lemon	Spain	2017
	Fenpropimorph	0.01	Lemon	Turkey	2017
	Fenuron	0.01	Lemon	Spain	2017
	Fenuron	0.01	Oragne	Spain	2017
	Flonicamid	0.016	Apple	Poland	2017
	Fludioxonil	0.237	Ananas	Costa Rica	2017
	Fludioxonil	0.05	Ananas	Costa Rica	2017
	Fludioxonil	0.865	Peach	Greece	2017
	Fludioxonil	0.022	Grapefruit	South Africa	2017
	Fludioxonil	0.03	Grapes	Italy	2017
	Fludioxonil	0.013	Apple	Poland	2017
	Fludioxonil	0.019	Apple	Croatia	2017
	Fludioxonil	0.272	Strawberry	Germany	2017
	Fludioxonil	0.043	Strawberry	Poland	2017
	Fludioxonil	3.003	Kiwi	Italy	2017
	Fludioxonil	0.054	Pear	The Netherlands	2017
	Fludioxonil	0.228	Lemon	Argentina	2017
	Fludioxonil	0.013	Lemon	Turkey	2017
	Fludioxonil	0.14	Lemon	Argentina	2017
	Fludioxonil	0.341	Lemon	Argentina	2017
	Fludioxonil	0.295	Lemon	Argentina	2017
	Fludioxonil	0.499	Lemon	Argentina	2017
	Fludioxonil	0.036	Mandarin	Greece	2017
	Fludioxonil	0.55	Mandarin	Cyprus	2017
	Fludioxonil	0.015	Sweet cherry	Romania	2017
	Fluoxastrobin	0.018	Oragne	Egypt	2017
	Fluoxastrobin	0.01	Oragne	Turkey	2017
	Flutriafol	0.026	Apple	North Macedonia	2017
	Hexaconazole	0.01	Grapefruit	Turkey	2017
	Hexythiazox	0.015	Lemon	Turkey	2017
	Imazalil	0.242	Banana	Ecuador	2017
	Imazalil	0.29	Banana	Ecuador	2017
	Imazalil	0.306	Banana	Ecuador	2017
	Imazalil	0.307	Banana	Costa Rica	2017
	Imazalil	0.129	Banana	Ecuador	2017
	Imazalil	0.761	Banana	Brazil	2017
	Imazalil	0.338	Banana	Ecuador	2017
	Imazalil	0.224	Banana	Ecuador	2017
	Imazalil	0.035	Banana	Ecuador	2017
	Imazalil	0.298	Banana	Ecuador	2017
	Imazalil	0.081	Grapefruit	Turkey	2017
	Imazalil	1.576	Grapefruit	Cyprus	2017
	Imazalil	0.152	Grapefruit	Turkey	2017
	Imazalil	2.708	Grapefruit	Turkey	2017
	Imazalil	0.034	Grapefruit	Turkey	2017
	Imazalil	0.492	Grapefruit	Turkey	2017
	Imazalil	0.182	Grapefruit	Turkey	2017
	Imazalil	0.048	Grapefruit	Turkey	2017
	Imazalil	0.471	Grapefruit	Turkey	2017
	Imazalil	0.148	Grapefruit	Turkey	2017
	Imazalil	1.006	Grapefruit	Turkey	2017
	Imazalil	0.405	Grapefruit	Turkey	2017
	Imazalil	0.531	Grapefruit	Turkey	2017
	Imazalil	0.838	Grapefruit	Turkey	2017
	Imazalil	1.614	Grapefruit	South Africa	2017
	Imazalil	0.29	Grapefruit	Turkey	2017
	Imazalil	0.427	Grapefruit	Turkey	2017
	Imazalil	0.774	Grapefruit	Turkey	2017
	Imazalil	0.205	Grapefruit	Turkey	2017
	Imazalil	0.126	Grapefruit	Turkey	2017
	Imazalil	1.096	Grapefruit	Israel	2017
	Imazalil	0.014	Grapes	Italy	2017
	Imazalil	0.087	Apple	Poland	2017
	Imazalil	0.031	Apple	Poland	2017
	Imazalil	0.011	Apple	Poland	2017
	Imazalil	0.025	Apple	Poland	2017
	Imazalil	0.014	Apple	Poland	2017
	Imazalil	0.019	Apple	Poland	2017
	Imazalil	0.32	Apple	Poland	2017
	Imazalil	0.018	Apple	Poland	2017
	Imazalil	0.022	Apple	Poland	2017
	Imazalil	0.132	Apple	Poland	2017
	Imazalil	0.018	Apple	Poland	2017
	Imazalil	0.034	Apple	Poland	2017
	Imazalil	0.014	Apple	Greece	2017
	Imazalil	0.01	Apple	Croatia	2017
	Imazalil	0.013	Apple	Poland	2017
	Imazalil	0.07	Apple	Poland	2017
	Imazalil	0.047	Apple	Greece	2017
	Imazalil	0.037	Apple	Greece	2017
	Imazalil	0.099	Apple	Hungary	2017
	Imazalil	0.048	Apple	Hungary	2017
	Imazalil	0.011	Apple	Italy	2017
	Imazalil	0.034	Apple	Italy	2017
	Imazalil	0.011	Apple	Croatia	2017
	Imazalil	0.108	Apple	Poland	2017
	Imazalil	0.018	Strawberry	Serbia	2017
	Imazalil	0.026	Clementine	Spain	2017
	Imazalil	1.135	Clementine	Spain	2017
	Imazalil	0.652	Clementine	Italy	2017
	Imazalil	0.546	Clementine	Egypt	2017
	Imazalil	0.013	Pear	Serbia	2017
	Imazalil	0.016	Pear	Serbia	2017
	Imazalil	0.025	Pear	Serbia	2017
	Imazalil	1.303	Lemon	Spain	2017
	Imazalil	0.344	Lemon	Greece	2017
	Imazalil	4.503	Lemon	Spain	2017
	Imazalil	4.258	Lemon	Spain	2017
	Imazalil	0.075	Lemon	Turkey	2017
	Imazalil	0.819	Lemon	Spain	2017
	Imazalil	0.975	Lemon	Argentina	2017
	Imazalil	0.014	Lemon	Turkey	2017
	Imazalil	0.333	Lemon	Turkey	2017
	Imazalil	1.689	Lemon	Turkey	2017
	Imazalil	0.744	Lemon	Turkey	2017
	Imazalil	2.333	Lemon	Turkey	2017
	Imazalil	0.618	Lemon	Turkey	2017
	Imazalil	0.014	Lemon	Turkey	2017
	Imazalil	0.029	Lemon	Turkey	2017
	Imazalil	0.049	Lemon	Turkey	2017
	Imazalil	0.032	Lemon	Turkey	2017
	Imazalil	0.039	Lemon	Turkey	2017
	Imazalil	0.018	Lemon	Turkey	2017
	Imazalil	1.047	Lemon	Turkey	2017
	Imazalil	1.443	Lemon	South Africa	2017
	Imazalil	0.277	Lemon	Spain	2017
	Imazalil	1.593	Lemon	Argentina	2017
	Imazalil	3.449	Lemon	Argentina	2017
	Imazalil	2.408	Lemon	Argentina	2017
	Imazalil	0.601	Lemon	Argentina	2017
	Imazalil	0.791	Lemon	Argentina	2017
	Imazalil	2.184	Lemon	Argentina	2017
	Imazalil	2.281	Lemon	Argentina	2017
	Imazalil	0.901	Lemon	Argentina	2017
	Imazalil	1.602	Lemon	Spain	2017
	Imazalil	0.587	Lemon	Argentina	2017
	Imazalil	0.013	Lemon	Argentina	2017
	Imazalil	0.336	Lemon	Greece	2017
	Imazalil	0.104	Lemon	Turkey	2017
	Imazalil	0.024	Lemon	Turkey	2017
	Imazalil	0.179	Lemon	Turkey	2017
	Imazalil	0.011	Lemon	Turkey	2017
	Imazalil	2.014	Lemon	Turkey	2017
	Imazalil	0.208	Lemon	Turkey	2017
	Imazalil	1.155	Lemon	Spain	2017
	Imazalil	0.581	Lemon	Spain	2017
	Imazalil	0.236	Mandarin	Greece	2017
	Imazalil	0.939	Mandarin	Turkey	2017
	Imazalil	0.398	Mandarin	Turkey	2017
	Imazalil	0.95	Mandarin	Turkey	2017
	Imazalil	0.304	Mandarin	Greece	2017
	Imazalil	0.635	Mandarin	Greece	2017
	Imazalil	0.071	Mandarin	Greece	2017
	Imazalil	0.605	Mandarin	Turkey	2017
	Imazalil	0.644	Mandarin	Turkey	2017
	Imazalil	0.15	Mandarin	Turkey	2017
	Imazalil	0.013	Mandarin	Albania	2017
	Imazalil	0.643	Mandarin	Albania	2017
	Imazalil	0.594	Mandarin	Turkey	2017
	Imazalil	0.011	Mandarin	Turkey	2017
	Imazalil	0.216	Mandarin	Spain	2017
	Imazalil	0.661	Mandarin	Spain	2017
	Imazalil	3.424	Mandarin	Cyprus	2017
	Imazalil	0.028	Mandarin	Turkey	2017
	Imazalil	1.907	Mandarin	Greece	2017
	Imazalil	0.454	Mandarin	Turkey	2017
	Imazalil	0.217	Mandarin	Turkey	2017
	Imazalil	2.065	Mandarin	Greece	2017
	Imazalil	0.02	Mandarin	Turkey	2017
	Imazalil	0.073	Mandarin	Turkey	2017
	Imazalil	0.046	Mandarin	Turkey	2017
	Imazalil	0.051	Mandarin	Turkey	2017
	Imazalil	0.033	Pomelo	China	2017
	Imazalil	1.406	Oragne	Spain	2017
	Imazalil	0.725	Oragne	Greece	2017
	Imazalil	1.09	Oragne	Egypt	2017
	Imazalil	4.023	Oragne	Greece	2017
	Imazalil	2.708	Oragne	Turkey	2017
	Imazalil	1.983	Oragne	Spain	2017
	Imazalil	0.16	Oragne	Greece	2017
	Imazalil	0.79	Oragne	Greece	2017
	Imazalil	0.367	Oragne	Greece	2017
	Imazalil	0.544	Oragne	Egypt	2017
	Imazalil	0.184	Oragne	Turkey	2017
	Imazalil	1.191	Oragne	Egypt	2017
	Imazalil	0.039	Oragne	Greece	2017
	Imazalil	2.471	Oragne	Egypt	2017
	Imazalil	0.821	Oragne	Egypt	2017
	Imazalil	0.958	Oragne	Spain	2017
	Imazalil	1.884	Oragne	Spain	2017
	Imazalil	0.482	Oragne	Greece	2017
	Imazalil	0.013	Oragne	Greece	2017
	Imazalil	0.309	Oragne	Greece	2017
	Imazalil	1.697	Oragne	Greece	2017
	Imazalil	0.01	Oragne	Greece	2017
	Imazalil	1.807	Oragne	Morocco	2017
	Imazalil	0.881	Oragne	Turkey	2017
	Imazalil	1.053	Oragne	Turkey	2017
	Imazalil	0.975	Oragne	Turkey	2017
	Imazalil	1.126	Oragne	Greece	2017
	Imazalil	1.106	Oragne	Turkey	2017
	Imazalil	0.842	Oragne	Turkey	2017
	Imazalil	0.69	Oragne	Turkey	2017
	Imazalil	0.825	Oragne	Turkey	2017
	Imazalil	2.634	Oragne	Turkey	2017
	Imazalil	2.296	Oragne	Turkey	2017
	Imazalil	0.201	Oragne	Turkey	2017
	Imazalil	1.145	Oragne	Egypt	2017
	Imazalil	1.302	Oragne	Spain	2017
	Imazalil	1.098	Oragne	Spain	2017
	Imazalil	0.479	Oragne	Greece	2017
	Imazalil	0.387	Oragne	Greece	2017
	Imazalil	2.388	Oragne	Spain	2017
	Imazalil	0.494	Oragne	Egypt	2017
	Imazalil	1.026	Oragne	Egypt	2017
	Imazalil	0.177	Oragne	Zimbabwe	2017
	Imazalil	1.453	Oragne	Morocco	2017
	Imazalil	0.217	Oragne	Turkey	2017
	Imazalil	0.049	Oragne	Turkey	2017
	Imazalil	0.013	Oragne	Turkey	2017
	Imazalil	0.978	Oragne	Turkey	2017
	Imazalil	0.263	Oragne	Spain	2017
	Imazalil	0.08	Oragne	Greece	2017
	Imazalil	0.564	Oragne	Greece	2017
	Imazalil	0.692	Oragne	Greece	2017
	Imazalil	0.434	Oragne	Turkey	2017
	Imazalil	1.248	Oragne	Turkey	2017
	Imazalil	0.193	Oragne	Turkey	2017
	Imazalil	0.953	Oragne	Greece	2017
	Imazalil	0.39	Oragne	Spain	2017
	Imazalil	1.155	Oragne	Spain	2017
	Imazalil	0.247	Oragne	Spain	2017
	Imazalil	0.419	Oragne	Spain	2017
	Imidacloprid	0.05	Ananas	Costa Rica	2017
	Imidacloprid	0.032	Ananas	Ivory Coast	2017
	Imidacloprid	0.013	Ananas	Colombia	2017
	Imidacloprid	0.03	Avocado	Peru	2017
	Imidacloprid	0.027	Banana	Ecuador	2017
	Imidacloprid	0.014	Banana	Ecuador	2017
	Imidacloprid	0.035	Banana	Brazil	2017
	Imidacloprid	0.014	Banana	Guatemala	2017
	Imidacloprid	0.034	Peach	Greece	2017
	Imidacloprid	0.013	Peach	Greece	2017
	Imidacloprid	0.013	Peach	Spain	2017
	Imidacloprid	0.012	Peach	Spain	2017
	Imidacloprid	0.01	Grapefruit	Turkey	2017
	Imidacloprid	0.093	Grapefruit	Turkey	2017
	Imidacloprid	0.017	Grapefruit	Turkey	2017
	Imidacloprid	0.014	Grapefruit	Turkey	2017
	Imidacloprid	0.013	Grapefruit	South Africa	2017
	Imidacloprid	0.02	Grapefruit	Turkey	2017
	Imidacloprid	0.013	Grapefruit	Turkey	2017
	Imidacloprid	0.014	Grapes	Bosnia and Herzegovina	2017
	Imidacloprid	0.016	Apple	Poland	2017
	Imidacloprid	0.019	Apple	Poland	2017
	Imidacloprid	0.027	Apple	Poland	2017
	Imidacloprid	0.205	Apple	Poland	2017
	Imidacloprid	0.209	Apple	Poland	2017
	Imidacloprid	0.192	Apple	Poland	2017
	Imidacloprid	0.173	Apple	Poland	2017
	Imidacloprid	0.153	Apple	Poland	2017
	Imidacloprid	0.061	Apple	Poland	2017
	Imidacloprid	0.043	Apple	Poland	2017
	Imidacloprid	0.034	Apple	Poland	2017
	Imidacloprid	0.04	Apple	Poland	2017
	Imidacloprid	0.065	Apple	Poland	2017
	Imidacloprid	0.031	Apple	Poland	2017
	Imidacloprid	0.021	Apple	Poland	2017
	Imidacloprid	0.02	Apple	Poland	2017
	Imidacloprid	0.011	Apple	Poland	2017
	Imidacloprid	0.078	Apple	Poland	2017
	Imidacloprid	0.039	Apple	Poland	2017
	Imidacloprid	0.038	Apple	Poland	2017
	Imidacloprid	0.038	Apple	Poland	2017
	Imidacloprid	0.114	Apple	Poland	2017
	Imidacloprid	0.039	Apple	Poland	2017
	Imidacloprid	0.032	Apple	Italy	2017
	Imidacloprid	0.134	Apple	Greece	2017
	Imidacloprid	0.179	Apple	France	2017
	Imidacloprid	0.179	Apple	Italy	2017
	Imidacloprid	0.119	Apple	Poland	2017
	Imidacloprid	0.11	Apple	Poland	2017
	Imidacloprid	0.18	Apple	Poland	2017
	Imidacloprid	0.139	Apple	Poland	2017
	Imidacloprid	0.013	Apple	Greece	2017
	Imidacloprid	0.133	Apple	Greece	2017
	Imidacloprid	0.189	Apple	Hungary	2017
	Imidacloprid	0.163	Apple	Hungary	2017
	Imidacloprid	0.016	Apple	Italy	2017
	Imidacloprid	0.032	Apple	Italy	2017
	Imidacloprid	0.024	Apple	Poland	2017
	Imidacloprid	0.016	Apple	Serbia	2017
	Imidacloprid	0.012	Strawberry	Spain	2017
	Imidacloprid	0.027	Strawberry	Spain	2017
	Imidacloprid	0.026	Strawberry	Greece	2017
	Imidacloprid	0.064	Strawberry	Serbia	2017
	Imidacloprid	0.061	Strawberry	Serbia	2017
	Imidacloprid	0.013	Strawberry	Serbia	2017
	Imidacloprid	0.014	Strawberry	Serbia	2017
	Imidacloprid	0.014	Strawberry	Serbia	2017
	Imidacloprid	0.01	Strawberry	Serbia	2017
	Imidacloprid	0.014	Strawberry	Serbia	2017
	Imidacloprid	0.017	Strawberry	Serbia	2017
	Imidacloprid	0.035	Strawberry	Poland	2017
	Imidacloprid	0.01	Apricot	Italy	2017
	Imidacloprid	0.015	Kiwi	Italy	2017
	Imidacloprid	0.108	Clementine	Italy	2017
	Imidacloprid	0.13	Pear	The Netherlands	2017
	Imidacloprid	0.014	Pear	Turkey	2017
	Imidacloprid	0.033	Pear	Serbia	2017
	Imidacloprid	0.074	Pear	Serbia	2017
	Imidacloprid	0.045	Pear	Serbia	2017
	Imidacloprid	0.016	Hazelnut	Croatia	2017
	Imidacloprid	0.07	Lemon	Spain	2017
	Imidacloprid	0.03	Lemon	Spain	2017
	Imidacloprid	0.013	Lemon	Argentina	2017
	Imidacloprid	0.01	Lemon	Turkey	2017
	Imidacloprid	0.011	Lemon	Turkey	2017
	Imidacloprid	0.037	Lemon	Turkey	2017
	Imidacloprid	0.022	Lemon	Turkey	2017
	Imidacloprid	0.033	Lemon	Turkey	2017
	Imidacloprid	0.095	Lemon	Turkey	2017
	Imidacloprid	0.116	Lemon	Turkey	2017
	Imidacloprid	0.078	Lemon	Turkey	2017
	Imidacloprid	0.01	Lemon	Turkey	2017
	Imidacloprid	0.012	Lemon	Argentina	2017
	Imidacloprid	0.012	Lemon	Argentina	2017
	Imidacloprid	0.012	Lemon	Turkey	2017
	Imidacloprid	0.031	Lemon	Spain	2017
	Imidacloprid	0.015	Mandarin	Greece	2017
	Imidacloprid	0.059	Mandarin	Spain	2017
	Imidacloprid	0.018	Mandarin	Spain	2017
	Imidacloprid	0.01	Mandarin	Turkey	2017
	Imidacloprid	0.088	Mandarin	Turkey	2017
	Imidacloprid	0.026	Mandarin	Turkey	2017
	Imidacloprid	0.081	Mandarin	Greece	2017
	Imidacloprid	0.092	Mandarin	Turkey	2017
	Imidacloprid	0.054	Mandarin	Turkey	2017
	Imidacloprid	0.022	Mandarin	Turkey	2017
	Imidacloprid	0.109	Mango	Peru	2017
	Imidacloprid	0.026	Pomegranate	Peru	2017
	Imidacloprid	0.055	Peach (nectarine)	Spain	2017
	Imidacloprid	0.045	Peach (nectarine)	Belgium	2017
	Imidacloprid	0.013	Peach (nectarine)	Italy	2017
	Imidacloprid	0.073	Oragne	Spain	2017
	Imidacloprid	0.08	Oragne	Greece	2017
	Imidacloprid	0.11	Oragne	Egypt	2017
	Imidacloprid	0.078	Oragne	Greece	2017
	Imidacloprid	0.076	Oragne	Greece	2017
	Imidacloprid	0.059	Oragne	Greece	2017
	Imidacloprid	0.093	Oragne	Turkey	2017
	Imidacloprid	0.02	Oragne	Spain	2017
	Imidacloprid	0.011	Oragne	Turkey	2017
	Imidacloprid	0.047	Oragne	Egypt	2017
	Imidacloprid	0.031	Oragne	Spain	2017
	Imidacloprid	0.024	Oragne	Spain	2017
	Imidacloprid	0.105	Oragne	Greece	2017
	Imidacloprid	0.088	Oragne	Turkey	2017
	Imidacloprid	0.068	Oragne	Turkey	2017
	Imidacloprid	0.089	Oragne	Turkey	2017
	Imidacloprid	0.01	Oragne	Egypt	2017
	Imidacloprid	0.012	Oragne	Egypt	2017
	Imidacloprid	0.013	Oragne	Greece	2017
	Imidacloprid	0.014	Oragne	Zimbabwe	2017
	Imidacloprid	0.031	Oragne	Spain	2017
	Imidacloprid	0.039	Plum	Serbia	2017
	Imidacloprid	0.031	Sweet cherry	Spain	2017
	Imidacloprid	0.03	Sweet cherry	Serbia	2017
	Imidacloprid	0.036	Date palm	Iran	2017
	Indoxacarb	0.014	Grapes	Turkey	2017
	Indoxacarb	0.028	Grapes	Italy	2017
	Indoxacarb	0.023	Apple	Poland	2017
	Indoxacarb	0.012	Apple	Poland	2017
	Indoxacarb	0.013	Apple	Italy	2017
	Indoxacarb	0.027	Apple	Poland	2017
	Indoxacarb	0.012	Apple	Italy	2017
	Kresoxim-methyl	0.026	Grapes	Turkey	2017
	Lufenuron	0.02	Ananas	Ivory Coast	2017
	Lufenuron	0.018	Ananas	Colombia	2017
	Lufenuron	0.018	Avocado	Peru	2017
	Lufenuron	0.018	Banana	Mexico	2017
	Lufenuron	0.013	Grapefruit	Turkey	2017
	Lufenuron	0.018	Grapefruit	Turkey	2017
	Lufenuron	0.027	Grapefruit	Turkey	2017
	Lufenuron	0.012	Grapefruit	Turkey	2017
	Lufenuron	0.018	Apple	Poland	2017
	Lufenuron	0.013	Apple	Poland	2017
	Lufenuron	0.02	Apple	Poland	2017
	Lufenuron	0.019	Apple	Poland	2017
	Lufenuron	0.017	Apple	Poland	2017
	Lufenuron	0.013	Apple	Greece	2017
	Lufenuron	0.019	Apple	Italy	2017
	Lufenuron	0.018	Apple	Italy	2017
	Lufenuron	0.019	Strawberry	Spain	2017
	Lufenuron	0.02	Strawberry	Spain	2017
	Lufenuron	0.018	Strawberry	Greece	2017
	Lufenuron	0.018	Strawberry	Poland	2017
	Lufenuron	0.026	Lemon	Turkey	2017
	Lufenuron	0.015	Lemon	Turkey	2017
	Lufenuron	0.012	Lemon	Turkey	2017
	Lufenuron	0.012	Lemon	Turkey	2017
	Lufenuron	0.013	Lemon	Turkey	2017
	Lufenuron	0.089	Lemon	Turkey	2017
	Lufenuron	0.012	Lemon	Argentina	2017
	Lufenuron	0.015	Lemon	Turkey	2017
	Lufenuron	0.787	Lemon	Turkey	2017
	Lufenuron	0.437	Lemon	Turkey	2017
	Lufenuron	0.099	Lemon	Turkey	2017
	Lufenuron	0.013	Mandarin	Greece	2017
	Lufenuron	0.018	Mandarin	Greece	2017
	Lufenuron	0.021	Mandarin	Turkey	2017
	Lufenuron	0.013	Oragne	Turkey	2017
	Lufenuron	0.013	Oragne	Turkey	2017
	Lufenuron	0.017	Oragne	Greece	2017
	Lufenuron	0.013	Oragne	Turkey	2017
	Lufenuron	0.016	Oragne	Turkey	2017
	Lufenuron	0.024	Oragne	Turkey	2017
	Lufenuron	0.019	Sweet cherry	Romania	2017
	Mepanipyrim	0.01	Lemon	Turkey	2017
	Metalaxyl	0.011	Grapes	Turkey	2017
	Metalaxyl	0.012	Strawberry	Serbia	2017
	Metalaxyl	0.01	Pear	Serbia	2017
	Metalaxyl	0.015	Lemon	Argentina	2017
	Metalaxyl	0.023	Peach (nectarine)	Italy	2017
	Metalaxyl	0.043	Oragne	Spain	2017
	Metalaxyl	0.01	Oragne	Zimbabwe	2017
	Metalaxyl	0.012	Oragne	Zimbabwe	2017
	Metalaxyl	0.012	Plum	Serbia	2017
	Metalaxyl	0.01	Sweet cherry	Serbia	2017
	Metalaxyl-M	0.01	Strawberry	Serbia	2017
	Metalaxyl-M	0.01	Pear	Serbia	2017
	Metalaxyl-M	0.01	Plum	Serbia	2017
	Metalaxyl-M	0.01	Sweet cherry	Serbia	2017
	Methamidophos	0.01	Banana	Ecuador	2017
	Methamidophos	0.01	Apple	Poland	2017
	Methamidophos	0.01	Apple	Poland	2017
	Methamidophos	0.01	Apple	Greece	2017
	Methamidophos	0.01	Clementine	Italy	2017
	Methamidophos	0.01	Mandarin	Greece	2017
	Methamidophos	0.01	Oragne	Greece	2017
	Methamidophos	0.01	Oragne	Greece	2017
	Methamidophos	0.01	Oragne	Turkey	2017
	Methomyl	0.02	Ananas	Costa Rica	2017
	Methomyl	0.02	Banana	Colombia	2017
	Methomyl	0.015	Peach	Spain	2017
	Methomyl	0.015	Grapefruit	Turkey	2017
	Methomyl	0.018	Grapefruit	Turkey	2017
	Methomyl	0.015	Grapefruit	Turkey	2017
	Methomyl	0.02	Grapes	North Macedonia	2017
	Methomyl	0.01	Grapes	Italy	2017
	Methomyl	0.02	Apple	North Macedonia	2017
	Methomyl	0.02	Apple	Poland	2017
	Methomyl	0.02	Kiwi	Italy	2017
	Methomyl	0.015	Clementine	Spain	2017
	Methomyl	0.015	Lemon	Argentina	2017
	Methomyl	0.018	Lemon	Argentina	2017
	Methomyl	0.012	Lemon	Argentina	2017
	Methomyl	0.018	Lemon	Argentina	2017
	Methomyl	0.015	Lemon	Argentina	2017
	Methomyl	0.015	Mandarin	Greece	2017
	Methomyl	0.016	Mandarin	Turkey	2017
	Methomyl	0.015	Mandarin	Turkey	2017
	Methomyl	0.016	Mandarin	Greece	2017
	Methomyl	0.016	Mandarin	Albania	2017
	Methomyl	0.015	Mandarin	Turkey	2017
	Methomyl	0.019	Mandarin	Turkey	2017
	Methomyl	0.018	Mandarin	Greece	2017
	Methomyl	0.01	Peach (nectarine)	Belgium	2017
	Methomyl	0.018	Peach (nectarine)	Spain	2017
	Methomyl	0.01	Oragne	Zimbabwe	2017
	Methomyl	0.017	Oragne	Turkey	2017
	Methomyl	0.015	Oragne	Greece	2017
	Methomyl	0.02	Oragne	Turkey	2017
	Methomyl	0.02	Plum	Serbia	2017
	Methomyl	0.01	Sweet cherry	Greece	2017
	Methoxyfenozide	0.012	Ananas	Costa Rica	2017
	Methoxyfenozide	0.012	Grapes	Turkey	2017
	Methoxyfenozide	0.123	Grapes	Turkey	2017
	Methoxyfenozide	0.012	Grapes	Turkey	2017
	Methoxyfenozide	0.014	Apple	Poland	2017
	Methoxyfenozide	0.029	Apple	Poland	2017
	Methoxyfenozide	0.029	Apple	Poland	2017
	Methoxyfenozide	0.018	Apple	Poland	2017
	Methoxyfenozide	0.026	Apple	Poland	2017
	Methoxyfenozide	0.026	Apple	Poland	2017
	Methoxyfenozide	0.032	Apple	Poland	2017
	Methoxyfenozide	0.096	Apple	Poland	2017
	Methoxyfenozide	0.025	Apple	Poland	2017
	Methoxyfenozide	0.092	Apple	Greece	2017
	Methoxyfenozide	0.031	Apple	Hungary	2017
	Methoxyfenozide	0.01	Apple	Italy	2017
	Methoxyfenozide	0.042	Apple	Croatia	2017
	Methoxyfenozide	0.011	Apple	Poland	2017
	Methoxyfenozide	0.01	Apple	Albania	2017
	Methoxyfenozide	0.02	Apple	North Macedonia	2017
	Methoxyfenozide	0.012	Apple	Poland	2017
	Methoxyfenozide	0.013	Apple	Croatia	2017
	Methoxyfenozide	0.012	Apple	Poland	2017
	Methoxyfenozide	0.012	Apple	Italy	2017
	Methoxyfenozide	0.013	Apple	Poland	2017
	Methoxyfenozide	0.034	Apple	Poland	2017
	Methoxyfenozide	0.034	Apple	Poland	2017
	Methoxyfenozide	0.012	Apple	Turkey	2017
	Methoxyfenozide	0.013	Apple	Croatia	2017
	Methoxyfenozide	0.012	Clementine	Spain	2017
	Methoxyfenozide	0.112	Oragne	Zimbabwe	2017
	Methoxyfenozide	0.012	Oragne	Italy	2017
	Methoxyfenozide	0.01	Plum	Serbia	2017
	Metobromuron	0.01	Apple	Croatia	2017
	Metobromuron	0.01	Lemon	Turkey	2017
	Metobromuron	0.01	Lemon	Turkey	2017
	Metribuzin	0.013	Apple	Hungary	2017
	Metribuzin	0.012	Lemon	Turkey	2017
	Metribuzin	0.014	Lemon	Turkey	2017
	Metribuzin	0.012	Lemon	Turkey	2017
	Metribuzin	0.018	Oragne	Spain	2017
	Myclobutanil	0.101	Banana	Guatemala	2017
	Myclobutanil	0.147	Banana	Colombia	2017
	Myclobutanil	0.011	Apple	Greece	2017
	Myclobutanil	0.031	Strawberry	Spain	2017
	Myclobutanil	0.091	Strawberry	Greece	2017
	Myclobutanil	0.035	Pomelo	China	2017
	Nitenpyram	0.01	Lemon	Turkey	2017
	Nuarimol	0.01	Mandarin	Spain	2017
	Oxadixyl	0.01	Grapefruit	Turkey	2017
	Oxadixyl	0.01	Grapefruit	Turkey	2017
	Penconazole	0.033	Grapes	Turkey	2017
	Penconazole	0.011	Grapes	Turkey	2017
	Penconazole	0.011	Grapes	Turkey	2017
	Penconazole	0.056	Strawberry	Germany	2017
	Picoxystrobin	0.02	Grapefruit	Turkey	2017
	Picoxystrobin	0.048	Grapefruit	Turkey	2017
	Picoxystrobin	0.05	Grapefruit	Turkey	2017
	Picoxystrobin	0.05	Grapefruit	Turkey	2017
	Picoxystrobin	0.012	Apple	Poland	2017
	Picoxystrobin	0.037	Pear	The Netherlands	2017
	Pirimicarb	0.018	Grapefruit	Turkey	2017
	Pirimicarb	0.014	Grapefruit	Turkey	2017
	Pirimicarb	0.014	Apple	Poland	2017
	Pirimicarb	0.082	Apple	Poland	2017
	Pirimicarb	0.014	Apple	Croatia	2017
	Pirimicarb	0.019	Lemon	Turkey	2017
	Pirimicarb	0.017	Lemon	Turkey	2017
	Pirimicarb	0.011	Oragne	Greece	2017
	Pirimicarb	0.035	Sweet cherry	Spain	2017
	Prochloraz	0.86	Ananas	Colombia	2017
	Prochloraz	0.093	Ananas	Ivory Coast	2017
	Prochloraz	1.071	Ananas	Colombia	2017
	Prochloraz	0.365	Ananas	Colombia	2017
	Prochloraz	0.816	Grapefruit	Turkey	2017
	Prochloraz	0.743	Grapefruit	Turkey	2017
	Prochloraz	0.807	Grapefruit	Turkey	2017
	Prochloraz	0.25	Grapefruit	Turkey	2017
	Prochloraz	0.917	Grapefruit	Turkey	2017
	Prochloraz	0.155	Grapefruit	Turkey	2017
	Prochloraz	0.052	Grapefruit	South Africa	2017
	Prochloraz	0.096	Grapefruit	Turkey	2017
	Prochloraz	0.191	Grapefruit	Turkey	2017
	Prochloraz	0.915	Grapefruit	Turkey	2017
	Prochloraz	0.331	Lemon	Spain	2017
	Prochloraz	0.975	Lemon	Turkey	2017
	Prochloraz	2.753	Lemon	Turkey	2017
	Prochloraz	0.552	Lemon	Turkey	2017
	Prochloraz	3.905	Lemon	Turkey	2017
	Prochloraz	0.611	Lemon	Turkey	2017
	Prochloraz	1.408	Lemon	Turkey	2017
	Prochloraz	0.091	Lemon	Turkey	2017
	Prochloraz	0.814	Lemon	Turkey	2017
	Prochloraz	0.722	Lemon	Turkey	2017
	Prochloraz	0.402	Lemon	Turkey	2017
	Prochloraz	1.489	Lemon	Turkey	2017
	Prochloraz	0.053	Lemon	Turkey	2017
	Prochloraz	0.015	Lemon	Turkey	2017
	Prochloraz	0.018	Lemon	Turkey	2017
	Prochloraz	0.208	Lemon	Turkey	2017
	Prochloraz	0.416	Lemon	Turkey	2017
	Prochloraz	0.557	Lemon	Turkey	2017
	Prochloraz	0.075	Lemon	Turkey	2017
	Prochloraz	0.611	Lemon	Turkey	2017
	Prochloraz	0.11	Mandarin	Turkey	2017
	Prochloraz	0.26	Mandarin	Turkey	2017
	Prochloraz	0.343	Mandarin	Turkey	2017
	Prochloraz	0.212	Mandarin	Turkey	2017
	Prochloraz	0.055	Mandarin	Turkey	2017
	Prochloraz	0.198	Mandarin	Turkey	2017
	Prochloraz	0.202	Mandarin	Turkey	2017
	Prochloraz	1.328	Mandarin	Turkey	2017
	Prochloraz	1.032	Mandarin	Turkey	2017
	Prochloraz	1.61	Mandarin	Turkey	2017
	Prochloraz	0.011	Mandarin	Turkey	2017
	Prochloraz	0.592	Mandarin	Turkey	2017
	Prochloraz	1.281	Mandarin	Turkey	2017
	Prochloraz	0.429	Oragne	Turkey	2017
	Prochloraz	1.009	Oragne	Turkey	2017
	Prochloraz	1.995	Oragne	Turkey	2017
	Prochloraz	0.477	Oragne	Turkey	2017
	Prochloraz	1.924	Oragne	Turkey	2017
	Prochloraz	0.013	Oragne	Turkey	2017
	Prochloraz	0.435	Oragne	Turkey	2017
	Propham	0.017	Ananas	Colombia	2017
	Propham	0.047	Grapes	Turkey	2017
	Propham	0.024	Grapes	Italy	2017
	Propham	0.037	Grapes	Italy	2017
	Propham	0.017	Grapes	Italy	2017
	Propham	0.047	Apple	North Macedonia	2017
	Propham	0.012	Apple	Poland	2017
	Propham	0.012	Apple	North Macedonia	2017
	Propham	0.025	Apple	Croatia	2017
	Propham	0.031	Apple	Italy	2017
	Propham	0.013	Apple	Poland	2017
	Propham	0.015	Apple	Poland	2017
	Propham	0.033	Pear	The Netherlands	2017
	Propham	0.041	Pear	Italy	2017
	Propham	0.045	Pear	Italy	2017
	Propham	0.035	Pear	Turkey	2017
	Propham	0.016	Lemon	Turkey	2017
	Propham	0.015	Lemon	Turkey	2017
	Propham	0.032	Lemon	Turkey	2017
	Propham	0.015	Oragne	Greece	2017
	Propham	0.05	Oragne	Spain	2017
	Propham	0.044	Oragne	Italy	2017
	Propiconazole	0.02	Apple	Serbia	2017
	Propiconazole	0.411	Clementine	Spain	2017
	Propiconazole	1.64	Lemon	Greece	2017
	Propiconazole	0.062	Lemon	Spain	2017
	Propiconazole	0.966	Lemon	Spain	2017
	Propiconazole	0.89	Lemon	Argentina	2017
	Propiconazole	0.013	Lemon	Turkey	2017
	Propiconazole	1.494	Lemon	Turkey	2017
	Propiconazole	0.051	Lemon	Turkey	2017
	Propiconazole	0.012	Lemon	Argentina	2017
	Propiconazole	0.585	Lemon	Argentina	2017
	Propiconazole	0.014	Lemon	Argentina	2017
	Propiconazole	0.953	Lemon	Argentina	2017
	Propiconazole	2.358	Lemon	Argentina	2017
	Propiconazole	0.853	Lemon	Argentina	2017
	Propiconazole	1.361	Lemon	Argentina	2017
	Propiconazole	0.226	Lemon	Turkey	2017
	Propiconazole	0.012	Mandarin	Spain	2017
	Propiconazole	0.079	Mandarin	Turkey	2017
	Propiconazole	0.055	Oragne	Turkey	2017
	Propiconazole	0.032	Oragne	Spain	2017
	Propiconazole	0.347	Oragne	Spain	2017
	Propiconazole	0.276	Oragne	Spain	2017
	Propiconazole	0.201	Oragne	Spain	2017
	Propiconazole	0.026	Oragne	Greece	2017
	Propoxur	0.033	Grapefruit	Turkey	2017
	Propoxur	0.01	Grapefruit	Turkey	2017
	Propoxur	0.022	Grapefruit	Turkey	2017
	Propoxur	0.011	Grapes	Turkey	2017
	Propoxur	0.017	Pear	The Netherlands	2017
	Propoxur	0.013	Lemon	Turkey	2017
	Propoxur	0.012	Lemon	Spain	2017
	Propoxur	0.016	Mandarin	Turkey	2017
	Propoxur	0.015	Pomelo	China	2017
	Propoxur	0.019	Oragne	Spain	2017
	Propoxur	0.023	Oragne	Spain	2017
	Propoxur	0.021	Oragne	Turkey	2017
	Propoxur	0.018	Oragne	Greece	2017
	Propoxur	0.01	Oragne	Greece	2017
	Propoxur	0.011	Oragne	Greece	2017
	Prothioconazole	0.016	Ananas	Costa Rica	2017
	Prothioconazole	0.019	Almond	The United States of America	2017
	Prothioconazole	0.02	Banana	Costa Rica	2017
	Prothioconazole	0.02	Banana	Guatemala	2017
	Prothioconazole	0.02	Banana	Ecuador	2017
	Prothioconazole	0.015	Grapefruit	Turkey	2017
	Prothioconazole	0.017	Grapefruit	Turkey	2017
	Prothioconazole	0.01	Apple	Poland	2017
	Prothioconazole	0.014	Apple	Poland	2017
	Prothioconazole	0.01	Apple	Poland	2017
	Prothioconazole	0.016	Apple	Poland	2017
	Prothioconazole	0.02	Apple	Poland	2017
	Prothioconazole	0.014	Apple	Poland	2017
	Prothioconazole	0.018	Apple	Poland	2017
	Prothioconazole	0.02	Apple	Italy	2017
	Prothioconazole	0.018	Apple	Italy	2017
	Prothioconazole	0.013	Apple	Italy	2017
	Prothioconazole	0.015	Apple	Croatia	2017
	Prothioconazole	0.02	Apple	Poland	2017
	Prothioconazole	0.013	Apple	Poland	2017
	Prothioconazole	0.02	Apple	Greece	2017
	Prothioconazole	0.012	Apple	Hungary	2017
	Prothioconazole	0.011	Apple	Hungary	2017
	Prothioconazole	0.012	Apple	Italy	2017
	Prothioconazole	0.02	Apricot	Italy	2017
	Prothioconazole	0.013	Clementine	Egypt	2017
	Prothioconazole	0.02	Lemon	Turkey	2017
	Prothioconazole	0.02	Lemon	Turkey	2017
	Prothioconazole	0.019	Lemon	Turkey	2017
	Prothioconazole	0.02	Lemon	Turkey	2017
	Prothioconazole	0.019	Lemon	Turkey	2017
	Prothioconazole	0.019	Lemon	Turkey	2017
	Prothioconazole	0.016	Lemon	Turkey	2017
	Prothioconazole	0.02	Lemon	Turkey	2017
	Prothioconazole	0.02	Lemon	Turkey	2017
	Prothioconazole	0.02	Lemon	Turkey	2017
	Prothioconazole	0.02	Mandarin	Turkey	2017
	Prothioconazole	0.014	Mandarin	Turkey	2017
	Prothioconazole	0.01	Mandarin	Greece	2017
	Prothioconazole	0.013	Mango	Peru	2017
	Prothioconazole	0.01	Pomegranate	Peru	2017
	Prothioconazole	0.015	Peach (nectarine)	Italy	2017
	Prothioconazole	0.011	Oragne	Greece	2017
	Prothioconazole	0.01	Oragne	Greece	2017
	Prothioconazole	0.02	Oragne	Turkey	2017
	Prothioconazole	0.017	Sweet cherry	Spain	2017
	Prothioconazole	0.019	Sweet cherry	Romania	2017
	Pymetrozine	0.01	Apple	Croatia	2017
	Pymetrozine	0.019	Lemon	Greece	2017
	Pyracarbolid	0.012	Lemon	Argentina	2017
	Pyracarbolid	0.017	Lemon	Argentina	2017
	Pyraclostrobin	0.03	Apple	Poland	2017
	Pyraclostrobin	0.027	Apple	Poland	2017
	Pyraclostrobin	0.011	Apple	Italy	2017
	Pyraclostrobin	0.02	Apple	Croatia	2017
	Pyraclostrobin	0.019	Lemon	Argentina	2017
	Pyraclostrobin	0.014	Lemon	Argentina	2017
	Pyraclostrobin	0.022	Lemon	Argentina	2017
	Pyraclostrobin	0.016	Pomelo	China	2017
	Pyraclostrobin	0.039	Oragne	Spain	2017
	Pyridaben	0.089	Grapefruit	Turkey	2017
	Pyridaben	0.025	Grapefruit	Turkey	2017
	Pyridaben	0.015	Grapefruit	Turkey	2017
	Pyridaben	0.055	Grapefruit	Turkey	2017
	Pyridaben	0.015	Lemon	Turkey	2017
	Pyridaben	0.046	Lemon	Turkey	2017
	Pyridaben	0.035	Lemon	Turkey	2017
	Pyridaben	0.028	Oragne	Turkey	2017
	Pyridaben	0.021	Oragne	Turkey	2017
	Pyrimethanil	2.543	Grapefruit	Cyprus	2017
	Pyrimethanil	0.035	Grapefruit	Turkey	2017
	Pyrimethanil	2.375	Grapefruit	Turkey	2017
	Pyrimethanil	0.33	Grapefruit	Turkey	2017
	Pyrimethanil	0.012	Grapefruit	Turkey	2017
	Pyrimethanil	0.012	Grapefruit	Turkey	2017
	Pyrimethanil	0.213	Grapes	Turkey	2017
	Pyrimethanil	0.077	Grapes	Turkey	2017
	Pyrimethanil	0.138	Grapes	Turkey	2017
	Pyrimethanil	1.056	Grapes	Turkey	2017
	Pyrimethanil	0.13	Grapes	Italy	2017
	Pyrimethanil	0.018	Apple	Croatia	2017
	Pyrimethanil	0.044	Apple	Poland	2017
	Pyrimethanil	0.024	Strawberry	Serbia	2017
	Pyrimethanil	0.038	Strawberry	Serbia	2017
	Pyrimethanil	0.183	Strawberry	Poland	2017
	Pyrimethanil	0.849	Clementine	Spain	2017
	Pyrimethanil	0.052	Blackberry	Serbia	2017
	Pyrimethanil	6.633	Lemon	Spain	2017
	Pyrimethanil	0.013	Lemon	Turkey	2017
	Pyrimethanil	0.018	Lemon	Spain	2017
	Pyrimethanil	0.796	Lemon	Argentina	2017
	Pyrimethanil	0.737	Lemon	Turkey	2017
	Pyrimethanil	0.023	Lemon	Turkey	2017
	Pyrimethanil	0.012	Lemon	Turkey	2017
	Pyrimethanil	0.159	Lemon	Turkey	2017
	Pyrimethanil	1.224	Lemon	Turkey	2017
	Pyrimethanil	1.69	Lemon	South Africa	2017
	Pyrimethanil	0.758	Lemon	Argentina	2017
	Pyrimethanil	0.017	Lemon	Argentina	2017
	Pyrimethanil	1.194	Lemon	Argentina	2017
	Pyrimethanil	0.091	Lemon	Argentina	2017
	Pyrimethanil	0.013	Lemon	Argentina	2017
	Pyrimethanil	0.451	Lemon	Spain	2017
	Pyrimethanil	0.012	Lemon	Turkey	2017
	Pyrimethanil	0.018	Lemon	Turkey	2017
	Pyrimethanil	0.011	Lemon	Turkey	2017
	Pyrimethanil	0.597	Lemon	Turkey	2017
	Pyrimethanil	0.988	Lemon	Turkey	2017
	Pyrimethanil	0.497	Mandarin	Turkey	2017
	Pyrimethanil	0.677	Mandarin	Turkey	2017
	Pyrimethanil	0.283	Mandarin	Turkey	2017
	Pyrimethanil	0.024	Mandarin	Turkey	2017
	Pyrimethanil	0.488	Mandarin	Turkey	2017
	Pyrimethanil	0.035	Mandarin	Turkey	2017
	Pyrimethanil	0.228	Mandarin	Turkey	2017
	Pyrimethanil	1.051	Mandarin	Turkey	2017
	Pyrimethanil	0.03	Mandarin	Greece	2017
	Pyrimethanil	0.02	Mandarin	Albania	2017
	Pyrimethanil	0.36	Mandarin	Turkey	2017
	Pyrimethanil	5.701	Mandarin	Cyprus	2017
	Pyrimethanil	0.299	Mandarin	Turkey	2017
	Pyrimethanil	0.432	Mandarin	Turkey	2017
	Pyrimethanil	0.014	Mandarin	Turkey	2017
	Pyrimethanil	0.668	Mandarin	Turkey	2017
	Pyrimethanil	2.375	Oragne	Turkey	2017
	Pyrimethanil	0.031	Oragne	Spain	2017
	Pyrimethanil	0.028	Oragne	Egypt	2017
	Pyrimethanil	2.248	Oragne	Spain	2017
	Pyrimethanil	0.025	Oragne	Turkey	2017
	Pyrimethanil	1.005	Oragne	Turkey	2017
	Pyrimethanil	1.741	Oragne	Turkey	2017
	Pyrimethanil	1.239	Oragne	Turkey	2017
	Pyrimethanil	0.076	Oragne	Turkey	2017
	Pyrimethanil	0.122	Oragne	Spain	2017
	Pyrimethanil	0.885	Oragne	Spain	2017
	Pyrimethanil	0.48	Oragne	Turkey	2017
	Pyrimethanil	0.034	Oragne	Greece	2017
	Pyrimethanil	0.615	Oragne	Turkey	2017
	Pyrimethanil	1.005	Oragne	Turkey	2017
	Pyrimethanil	0.045	Oragne	Turkey	2017
	Pyrimethanil	0.035	Oragne	Greece	2017
	Pyrimethanil	0.168	Oragne	Spain	2017
	Pyrimethanil	0.015	Plum	Serbia	2017
	Pyriproxyfen	0.015	Grapefruit	Turkey	2017
	Pyriproxyfen	0.017	Grapefruit	Turkey	2017
	Pyriproxyfen	0.017	Grapefruit	Turkey	2017
	Pyriproxyfen	0.012	Grapefruit	Turkey	2017
	Pyriproxyfen	0.013	Grapefruit	Turkey	2017
	Pyriproxyfen	0.05	Grapefruit	Turkey	2017
	Pyriproxyfen	0.024	Lemon	Spain	2017
	Pyriproxyfen	0.031	Lemon	Greece	2017
	Pyriproxyfen	0.017	Lemon	Spain	2017
	Pyriproxyfen	0.014	Lemon	Turkey	2017
	Pyriproxyfen	0.024	Lemon	Turkey	2017
	Pyriproxyfen	0.011	Lemon	Turkey	2017
	Pyriproxyfen	0.017	Lemon	Turkey	2017
	Pyriproxyfen	0.025	Lemon	Turkey	2017
	Pyriproxyfen	0.013	Lemon	Turkey	2017
	Pyriproxyfen	0.015	Lemon	Turkey	2017
	Pyriproxyfen	0.042	Lemon	Turkey	2017
	Pyriproxyfen	0.029	Lemon	Turkey	2017
	Pyriproxyfen	0.15	Lemon	Turkey	2017
	Pyriproxyfen	0.033	Lemon	Turkey	2017
	Pyriproxyfen	0.022	Lemon	Turkey	2017
	Pyriproxyfen	0.014	Lemon	Turkey	2017
	Pyriproxyfen	0.037	Lemon	Turkey	2017
	Pyriproxyfen	0.027	Lemon	Spain	2017
	Pyriproxyfen	0.029	Mandarin	Turkey	2017
	Pyriproxyfen	0.026	Mandarin	Turkey	2017
	Pyriproxyfen	0.019	Mandarin	Spain	2017
	Pyriproxyfen	0.015	Mandarin	Turkey	2017
	Pyriproxyfen	0.031	Mandarin	Turkey	2017
	Pyriproxyfen	0.014	Mandarin	Turkey	2017
	Pyriproxyfen	0.012	Oragne	Turkey	2017
	Pyriproxyfen	0.022	Oragne	Turkey	2017
	Pyriproxyfen	0.018	Oragne	Turkey	2017
	Pyriproxyfen	0.02	Oragne	Turkey	2017
	Pyriproxyfen	0.027	Oragne	Spain	2017
	Siduron	0.01	Lemon	Turkey	2017
	Spirodiclofen	0.016	Apple	Poland	2017
	Spirodiclofen	0.195	Lemon	Turkey	2017
	Spirodiclofen	0.021	Lemon	Turkey	2017
	Spirodiclofen	0.034	Oragne	Turkey	2017
	Spiromesifen	0.01	Grapefruit	Turkey	2017
	Spiromesifen	0.018	Grapes	Turkey	2017
	Spiromesifen	0.011	Apple	Poland	2017
	Spiromesifen	0.013	Apple	Italy	2017
	Spiromesifen	0.014	Apple	Poland	2017
	Spiromesifen	0.014	Clementine	Spain	2017
	Spiromesifen	0.013	Pear	Italy	2017
	Spiromesifen	0.01	Pomelo	China	2017
	Spiromesifen	0.011	Oragne	Greece	2017
	Spiromesifen	0.017	Plum	Serbia	2017
	Spirotetramat	0.027	Grapes	Turkey	2017
	Spirotetramat	0.059	Grapes	Turkey	2017
	Tebuconazole	0.012	Ananas	Colombia	2017
	Tebuconazole	0.047	Ananas	Colombia	2017
	Tebuconazole	1	Peach	Greece	2017
	Tebuconazole	0.048	Peach	Greece	2017
	Tebuconazole	0.014	Grapefruit	Turkey	2017
	Tebuconazole	0.018	Grapefruit	Turkey	2017
	Tebuconazole	0.033	Grapefruit	Turkey	2017
	Tebuconazole	0.113	Grapefruit	Turkey	2017
	Tebuconazole	0.046	Grapes	Italy	2017
	Tebuconazole	0.039	Apple	Poland	2017
	Tebuconazole	0.073	Apple	Poland	2017
	Tebuconazole	0.017	Apple	Poland	2017
	Tebuconazole	0.017	Apple	Poland	2017
	Tebuconazole	0.047	Apple	Poland	2017
	Tebuconazole	0.337	Apple	Poland	2017
	Tebuconazole	0.018	Apple	Poland	2017
	Tebuconazole	0.111	Apple	Poland	2017
	Tebuconazole	0.044	Apple	Serbia	2017
	Tebuconazole	0.048	Apple	Serbia	2017
	Tebuconazole	0.063	Apple	Serbia	2017
	Tebuconazole	0.042	Lemon	Turkey	2017
	Tebuconazole	0.016	Lemon	Turkey	2017
	Tebuconazole	0.026	Lemon	Turkey	2017
	Tebuconazole	0.069	Lemon	Turkey	2017
	Tebuconazole	0.013	Lemon	Turkey	2017
	Tebuconazole	0.085	Lemon	Turkey	2017
	Tebuconazole	0.017	Mandarin	Turkey	2017
	Tebuconazole	0.041	Mandarin	Turkey	2017
	Tebuconazole	0.038	Mandarin	Turkey	2017
	Tebuconazole	0.029	Mandarin	Turkey	2017
	Tebuconazole	0.011	Mandarin	Turkey	2017
	Tebuconazole	0.029	Mandarin	Turkey	2017
	Tebuconazole	0.032	Mandarin	Turkey	2017
	Tebuconazole	0.026	Mandarin	Turkey	2017
	Tebuconazole	0.035	Peach (nectarine)	Belgium	2017
	Tebuconazole	0.037	Peach (nectarine)	Italy	2017
	Tebuconazole	0.013	Oragne	Turkey	2017
	Tebuconazole	0.023	Oragne	Turkey	2017
	Tebuconazole	0.02	Oragne	Turkey	2017
	Tebuconazole	0.06	Oragne	Turkey	2017
	Tebuconazole	0.029	Plum	Serbia	2017
	Tebuconazole	0.04	Plum	Serbia	2017
	Tebuconazole	0.018	Sweet cherry	Spain	2017
	Tebuconazole	0.033	Sweet cherry	Romania	2017
	Tebuconazole	0.064	Sour cherry	Serbia	2017
	Tebufenozide	0.046	Grapefruit	Turkey	2017
	Tebufenozide	0.02	Grapefruit	Turkey	2017
	Tebufenozide	0.051	Grapefruit	Turkey	2017
	Tebufenozide	0.024	Grapefruit	Turkey	2017
	Tebufenozide	0.016	Grapefruit	Turkey	2017
	Tebufenozide	0.041	Grapefruit	Turkey	2017
	Tebufenozide	0.014	Grapefruit	Turkey	2017
	Tebufenozide	0.021	Grapefruit	Turkey	2017
	Tebufenpyrad	0.011	Strawberry	Spain	2017
	Teflubenzuron	0.011	Avocado	Peru	2017
	Teflubenzuron	0.012	Banana	Ecuador	2017
	Teflubenzuron	0.011	Banana	Ecuador	2017
	Teflubenzuron	0.011	Grapefruit	Turkey	2017
	Teflubenzuron	0.011	Grapefruit	Turkey	2017
	Teflubenzuron	0.011	Grapefruit	Turkey	2017
	Teflubenzuron	0.012	Apple	Poland	2017
	Teflubenzuron	0.011	Apple	Poland	2017
	Teflubenzuron	0.024	Strawberry	Greece	2017
	Teflubenzuron	0.011	Lemon	Spain	2017
	Teflubenzuron	0.015	Lemon	Greece	2017
	Teflubenzuron	0.011	Lemon	Spain	2017
	Teflubenzuron	0.011	Lemon	Turkey	2017
	Teflubenzuron	0.014	Lemon	Turkey	2017
	Teflubenzuron	0.012	Lemon	Turkey	2017
	Teflubenzuron	0.011	Lemon	Turkey	2017
	Teflubenzuron	0.013	Lemon	Turkey	2017
	Teflubenzuron	0.011	Lemon	Turkey	2017
	Teflubenzuron	0.025	Lemon	Turkey	2017
	Teflubenzuron	0.014	Lemon	Turkey	2017
	Teflubenzuron	0.011	Lemon	Turkey	2017
	Teflubenzuron	0.011	Lemon	Turkey	2017
	Teflubenzuron	0.022	Lemon	Argentina	2017
	Teflubenzuron	0.011	Lemon	Argentina	2017
	Teflubenzuron	0.024	Lemon	Argentina	2017
	Teflubenzuron	0.011	Lemon	Spain	2017
	Teflubenzuron	0.015	Lemon	Argentina	2017
	Teflubenzuron	0.012	Lemon	Turkey	2017
	Teflubenzuron	0.013	Mandarin	Turkey	2017
	Teflubenzuron	0.011	Mandarin	Greece	2017
	Teflubenzuron	0.011	Mango	Peru	2017
	Teflubenzuron	0.011	Oragne	Spain	2017
	Teflubenzuron	0.012	Oragne	Greece	2017
	Teflubenzuron	0.011	Oragne	Egypt	2017
	Teflubenzuron	0.011	Oragne	Turkey	2017
	Teflubenzuron	0.017	Oragne	Egypt	2017
	Teflubenzuron	0.013	Oragne	Greece	2017
	Teflubenzuron	0.011	Oragne	Spain	2017
	Teflubenzuron	0.012	Oragne	Turkey	2017
	Teflubenzuron	0.011	Oragne	Turkey	2017
	Teflubenzuron	0.015	Oragne	Morocco	2017
	Tetraconazole	0.01	Grapefruit	Turkey	2017
	Tetraconazole	0.065	Apple	Poland	2017
	Tetraconazole	0.013	Mandarin	Turkey	2017
	Thiabendazole	0.01	Avocado	Peru	2017
	Thiabendazole	0.334	Banana	Ecuador	2017
	Thiabendazole	0.208	Banana	Ecuador	2017
	Thiabendazole	0.241	Banana	Ecuador	2017
	Thiabendazole	0.118	Banana	Ecuador	2017
	Thiabendazole	0.644	Banana	Brazil	2017
	Thiabendazole	0.245	Banana	Ecuador	2017
	Thiabendazole	0.111	Banana	Ecuador	2017
	Thiabendazole	0.121	Banana	Mexico	2017
	Thiabendazole	0.023	Banana	Ecuador	2017
	Thiabendazole	0.193	Banana	Ecuador	2017
	Thiabendazole	0.08	Grapefruit	Turkey	2017
	Thiabendazole	0.026	Grapefruit	Cyprus	2017
	Thiabendazole	0.103	Grapefruit	Turkey	2017
	Thiabendazole	0.093	Grapefruit	Turkey	2017
	Thiabendazole	0.031	Grapefruit	Turkey	2017
	Thiabendazole	0.134	Grapefruit	Turkey	2017
	Thiabendazole	1.092	Grapefruit	Turkey	2017
	Thiabendazole	0.398	Grapefruit	Turkey	2017
	Thiabendazole	0.395	Grapefruit	Turkey	2017
	Thiabendazole	0.15	Grapefruit	Turkey	2017
	Thiabendazole	0.245	Grapefruit	Turkey	2017
	Thiabendazole	0.753	Grapefruit	Turkey	2017
	Thiabendazole	0.04	Grapefruit	Turkey	2017
	Thiabendazole	0.017	Grapefruit	South Africa	2017
	Thiabendazole	0.277	Grapefruit	Turkey	2017
	Thiabendazole	0.015	Grapefruit	Turkey	2017
	Thiabendazole	0.517	Grapefruit	Israel	2017
	Thiabendazole	0.263	Apple	Poland	2017
	Thiabendazole	0.493	Clementine	Egypt	2017
	Thiabendazole	0.019	Lemon	Turkey	2017
	Thiabendazole	0.063	Lemon	Turkey	2017
	Thiabendazole	0.219	Lemon	Turkey	2017
	Thiabendazole	0.16	Lemon	Turkey	2017
	Thiabendazole	0.023	Lemon	Turkey	2017
	Thiabendazole	0.391	Lemon	Turkey	2017
	Thiabendazole	0.359	Lemon	South Africa	2017
	Thiabendazole	0.53	Lemon	Argentina	2017
	Thiabendazole	0.034	Lemon	Argentina	2017
	Thiabendazole	0.982	Lemon	Argentina	2017
	Thiabendazole	1.117	Lemon	Argentina	2017
	Thiabendazole	0.439	Lemon	Argentina	2017
	Thiabendazole	0.201	Lemon	Argentina	2017
	Thiabendazole	0.72	Lemon	Argentina	2017
	Thiabendazole	0.045	Lemon	Turkey	2017
	Thiabendazole	0.699	Lemon	Turkey	2017
	Thiabendazole	0.087	Lemon	Turkey	2017
	Thiabendazole	0.461	Mandarin	Turkey	2017
	Thiabendazole	0.061	Mandarin	Turkey	2017
	Thiabendazole	0.034	Mandarin	Turkey	2017
	Thiabendazole	0.134	Mandarin	Turkey	2017
	Thiabendazole	0.277	Mandarin	Turkey	2017
	Thiabendazole	0.021	Mandarin	Turkey	2017
	Thiabendazole	0.256	Mandarin	Turkey	2017
	Thiabendazole	0.035	Mandarin	Turkey	2017
	Thiabendazole	0.234	Mandarin	Cyprus	2017
	Thiabendazole	0.015	Mandarin	Turkey	2017
	Thiabendazole	0.075	Mandarin	Turkey	2017
	Thiabendazole	0.01	Mandarin	Turkey	2017
	Thiabendazole	0.146	Mandarin	Turkey	2017
	Thiabendazole	0.029	Mandarin	Turkey	2017
	Thiabendazole	0.01	Mandarin	Turkey	2017
	Thiabendazole	3.076	Oragne	Spain	2017
	Thiabendazole	0.016	Oragne	Greece	2017
	Thiabendazole	0.156	Oragne	Egypt	2017
	Thiabendazole	0.093	Oragne	Turkey	2017
	Thiabendazole	0.471	Oragne	Egypt	2017
	Thiabendazole	0.011	Oragne	Turkey	2017
	Thiabendazole	1.792	Oragne	Egypt	2017
	Thiabendazole	0.819	Oragne	Egypt	2017
	Thiabendazole	0.235	Oragne	Egypt	2017
	Thiabendazole	0.365	Oragne	Spain	2017
	Thiabendazole	2.149	Oragne	Morocco	2017
	Thiabendazole	0.835	Oragne	Turkey	2017
	Thiabendazole	0.391	Oragne	Turkey	2017
	Thiabendazole	3.139	Oragne	Turkey	2017
	Thiabendazole	0.015	Oragne	Turkey	2017
	Thiabendazole	0.433	Oragne	Turkey	2017
	Thiabendazole	0.386	Oragne	Turkey	2017
	Thiabendazole	0.015	Oragne	Turkey	2017
	Thiabendazole	0.045	Oragne	Turkey	2017
	Thiabendazole	0.515	Oragne	Egypt	2017
	Thiabendazole	0.084	Oragne	Egypt	2017
	Thiabendazole	0.422	Oragne	Egypt	2017
	Thiabendazole	0.407	Oragne	Zimbabwe	2017
	Thiabendazole	0.363	Oragne	Morocco	2017
	Thiabendazole	1.026	Oragne	Zimbabwe	2017
	Thiabendazole	0.055	Oragne	Turkey	2017
	Thiabendazole	0.049	Oragne	Turkey	2017
	Thiabendazole	0.34	Oragne	Turkey	2017
	Thiabendazole	0.29	Oragne	Turkey	2017
	Thiabendazole	0.452	Oragne	Turkey	2017
	Thiabendazole	0.045	Oragne	Turkey	2017
	Thiabendazole	0.051	Oragne	Spain	2017
	Thiacloprid	0.017	Ananas	Colombia	2017
	Thiacloprid	0.035	Banana	Ecuador	2017
	Thiacloprid	0.016	Banana	Mexico	2017
	Thiacloprid	0.016	Peach	Greece	2017
	Thiacloprid	0.016	Peach	Spain	2017
	Thiacloprid	0.015	Peach	Spain	2017
	Thiacloprid	0.02	Grapefruit	Turkey	2017
	Thiacloprid	0.015	Grapefruit	Turkey	2017
	Thiacloprid	0.014	Grapefruit	Turkey	2017
	Thiacloprid	0.019	Grapefruit	South Africa	2017
	Thiacloprid	0.024	Apple	Poland	2017
	Thiacloprid	0.013	Apple	Poland	2017
	Thiacloprid	0.011	Apple	Poland	2017
	Thiacloprid	0.021	Apple	Poland	2017
	Thiacloprid	0.016	Apple	Italy	2017
	Thiacloprid	0.028	Apple	Greece	2017
	Thiacloprid	0.082	Apple	Greece	2017
	Thiacloprid	0.015	Apple	Poland	2017
	Thiacloprid	0.032	Strawberry	Poland	2017
	Thiacloprid	0.036	Apricot	Italy	2017
	Thiacloprid	0.021	Pear	South Africa	2017
	Thiacloprid	0.017	Pear	Turkey	2017
	Thiacloprid	0.02	Lemon	Argentina	2017
	Thiacloprid	0.018	Lemon	Turkey	2017
	Thiacloprid	0.015	Lemon	Turkey	2017
	Thiacloprid	0.02	Lemon	Turkey	2017
	Thiacloprid	0.019	Lemon	Turkey	2017
	Thiacloprid	0.011	Lemon	Argentina	2017
	Thiacloprid	0.012	Lemon	Argentina	2017
	Thiacloprid	0.011	Lemon	Argentina	2017
	Thiacloprid	0.01	Lemon	Spain	2017
	Thiacloprid	0.011	Lemon	Argentina	2017
	Thiacloprid	0.018	Peach (nectarine)	Spain	2017
	Thiacloprid	0.018	Peach (nectarine)	Italy	2017
	Thiacloprid	0.02	Oragne	Turkey	2017
	Thiacloprid	0.01	Oragne	Greece	2017
	Thiacloprid	0.011	Oragne	Greece	2017
	Thiacloprid	0.02	Oragne	Egypt	2017
	Thiacloprid	0.019	Oragne	Egypt	2017
	Thiacloprid	0.02	Oragne	Egypt	2017
	Thiacloprid	0.02	Oragne	Greece	2017
	Thiacloprid	0.011	Oragne	Zimbabwe	2017
	Thiacloprid	0.015	Oragne	Morocco	2017
	Thiacloprid	0.015	Sweet cherry	Greece	2017
	Thiacloprid	0.016	Sweet cherry	Italy	2017
	Thiacloprid	0.012	Sweet cherry	Greece	2017
	Thiamethoxam	0.014	Banana	Costa Rica	2017
	Thiamethoxam	0.026	Grapefruit	Turkey	2017
	Thiamethoxam	0.023	Grapefruit	Turkey	2017
	Thiamethoxam	0.01	Pear	Turkey	2017
	Thiamethoxam	0.014	Lemon	Turkey	2017
	Thiamethoxam	0.011	Lemon	Turkey	2017
	Thiamethoxam	0.018	Pomegranate	Peru	2017
	Thiamethoxam	0.017	Oragne	Greece	2017
	Thiamethoxam	0.015	Oragne	Greece	2017
	Thiamethoxam	0.033	Oragne	Turkey	2017
	Thiophanate-methyl	0.114	Apple	Greece	2017
	Thiophanate-methyl	0.01	Apple	Poland	2017
	Thiophanate-methyl	0.01	Pear	Serbia	2017
	Thiophanate-methyl	0.01	Lemon	Turkey	2017
	Thiophanate-methyl	0.05	Lemon	Turkey	2017
	Thiophanate-methyl	0.05	Lemon	Turkey	2017
	Thiophanate-methyl	0.031	Lemon	Turkey	2017
	Thiophanate-methyl	0.014	Lemon	Turkey	2017
	Triadimefon	0.016	Ananas	Colombia	2017
	Triadimenol	0.028	Ananas	Colombia	2017
	Triadimenol	0.016	Apple	Poland	2017
	Triadimenol	0.01	Apple	Poland	2017
	Triticonazole	0.01	Banana	Guatemala	2017
	Triticonazole	0.01	Lemon	Argentina	2017
	Triticonazole	0.01	Peach (nectarine)	Italy	2017

## Sheet: 2018
Supplementary material 2
	Analyte	Value (mg/kg)	Matrix	Country	Year
		/	Apple	Italy	2018
		/	Ananas	Costa Rica	2018
		/	Ananas	Costa Rica	2018
		/	Ananas	Colombia	2018
		/	Ananas	Colombia	2018
		/	Avocado	Colombia	2018
		/	Avocado	Peru	2018
		/	Avocado	Peru	2018
		/	Almond	The United States of America	2018
		/	Banana	Colombia	2018
		/	Banana	Colombia	2018
		/	Banana	Colombia	2018
		/	Banana	Ecuador	2018
		/	Banana	Ecuador	2018
		/	Banana	Costa Rica	2018
		/	Banana	Ghana	2018
		/	Banana	Costa Rica	2018
		/	Banana	Colombia	2018
		/	Banana	Costa Rica	2018
		/	Banana	Colombia	2018
		/	Banana	Mexico	2018
		/	Banana	Mexico	2018
		/	Banana	Panama	2018
		/	Banana	Ecuador	2018
		/	Banana	Guatemala	2018
		/	Banana	Ecuador	2018
		/	Banana	Costa Rica	2018
		/	Banana	Ecuador	2018
		/	Banana	Ecuador	2018
		/	Banana	Mexico	2018
		/	Banana	Mexico	2018
		/	Banana	Panama	2018
		/	Banana	Guatemala	2018
		/	Banana	Costa Rica	2018
		/	Banana	Colombia	2018
		/	Banana	Costa Rica	2018
		/	Banana	Costa Rica	2018
		/	Banana	Colombia	2018
		/	Banana	Costa Rica	2018
		/	Banana	Colombia	2018
		/	Banana	Colombia	2018
		/	Banana	Costa Rica	2018
		/	Banana	Mexico	2018
		/	Banana	Colombia	2018
		/	Banana	Ecuador	2018
		/	Banana	Panama	2018
		/	Blueberry	Peru	2018
		/	Blueberry	Argentina	2018
		/	Brazil nut	Bolivia	2018
		/	Peach	Greece	2018
		/	Peach	Greece	2018
		/	Peach	Greece	2018
		/	Quince	Greece	2018
		/	Grapefruit	South Africa	2018
		/	Grapefruit	Greece	2018
		/	Grapefruit	South Africa	2018
		/	Grapefruit	South Africa	2018
		/	Grapefruit	Turkey	2018
		/	Grapefruit	Greece	2018
		/	Grapes	North Macedonia	2018
		/	Grapes	North Macedonia	2018
		/	Grapes	Serbia	2018
		/	Grapes	North Macedonia	2018
		/	Grapes	Italy	2018
		/	Grapes	Italy	2018
		/	Grapes	North Macedonia	2018
		/	Grapes	North Macedonia	2018
		/	Grapes	North Macedonia	2018
		/	Grapes	North Macedonia	2018
		/	Grapes	North Macedonia	2018
		/	Grapes	North Macedonia	2018
		/	Grapes	North Macedonia	2018
		/	Grapes	North Macedonia	2018
		/	Grapes	North Macedonia	2018
		/	Grapes	North Macedonia	2018
		/	Grapes	North Macedonia	2018
		/	Grapes	North Macedonia	2018
		/	Grapes	North Macedonia	2018
		/	Grapes	North Macedonia	2018
		/	Grapes	North Macedonia	2018
		/	Grapes	North Macedonia	2018
		/	Grapes	North Macedonia	2018
		/	Grapes	North Macedonia	2018
		/	Grapes	North Macedonia	2018
		/	Grapes	North Macedonia	2018
		/	Grapes	North Macedonia	2018
		/	Grapes	North Macedonia	2018
		/	Grapes	North Macedonia	2018
		/	Grapes	North Macedonia	2018
		/	Grapes	North Macedonia	2018
		/	Grapes	North Macedonia	2018
		/	Grapes	North Macedonia	2018
		/	Grapes	North Macedonia	2018
		/	Grapes	North Macedonia	2018
		/	Grapes	North Macedonia	2018
		/	Grapes	North Macedonia	2018
		/	Grapes	North Macedonia	2018
		/	Apple	Serbia	2018
		/	Apple	Serbia	2018
		/	Apple	Serbia	2018
		/	Apple	Serbia	2018
		/	Apple	Serbia	2018
		/	Apple	The Netherlands	2018
		/	Apple	The Netherlands	2018
		/	Apple	Serbia	2018
		/	Apple	Serbia	2018
		/	Apple	Poland	2018
		/	Apple	Italy	2018
		/	Apple	Poland	2018
		/	Apple	Poland	2018
		/	Apple	Poland	2018
		/	Apple	Poland	2018
		/	Apple	Italy	2018
		/	Apple	Poland	2018
		/	Apple	Albania	2018
		/	Apple	Serbia	2018
		/	Apple	Serbia	2018
		/	Apple	Poland	2018
		/	Apple	Poland	2018
		/	Apple	Poland	2018
		/	Apple	Poland	2018
		/	Apple	Italy	2018
		/	Apple	Poland	2018
		/	Apple	Poland	2018
		/	Apple	Poland	2018
		/	Apple	Poland	2018
		/	Apple	Poland	2018
		/	Apple	Poland	2018
		/	Apple	Poland	2018
		/	Apple	Poland	2018
		/	Apple	Poland	2018
		/	Japanese apple	Spain	2018
		/	Chestnut	Serbia	2018
		/	Peanut	Argentina	2018
		/	Kiwi	Greece	2018
		/	Kiwi	Greece	2018
		/	Kiwi	Chile	2018
		/	Kiwi	Greece	2018
		/	Kiwi	Greece	2018
		/	Kiwi	Italy	2018
		/	Kiwi	Italy	2018
		/	Clementine	Spain	2018
		/	Clementine	Italy	2018
		/	Pear	China	2018
		/	Pear	Italy	2018
		/	Pear	Belgium	2018
		/	Pear	Italy	2018
		/	Kumquat	Israel	2018
		/	Blackberry	Serbia	2018
		/	Hazelnut	Croatia	2018
		/	Lime	Mexico	2018
		/	Lime	Mexico	2018
		/	Lime	China	2018
		/	Lemon	Italy	2018
		/	Lemon	Turkey	2018
		/	Lemon	Greece	2018
		/	Lemon	Italy	2018
		/	Lemon	Greece	2018
		/	Lemon	Turkey	2018
		/	Lemon	Greece	2018
		/	Lemon	South Africa	2018
		/	Lemon	Turkey	2018
		/	Lemon	Turkey	2018
		/	Lemon	Turkey	2018
		/	Lemon	Argentina	2018
		/	Lemon	Argentina	2018
		/	Lemon	Greece	2018
		/	Lemon	Greece	2018
		/	Lemon	Turkey	2018
		/	Raspberry	The Netherlands	2018
		/	Raspberry	Spain	2018
		/	Mandarin	Italy	2018
		/	Mandarin	Greece	2018
		/	Mandarin	Croatia	2018
		/	Mandarin	Turkey	2018
		/	Mandarin	Turkey	2018
		/	Mandarin	Turkey	2018
		/	Mandarin	Turkey	2018
		/	Mandarin	Turkey	2018
		/	Mandarin	Croatia	2018
		/	Mandarin	Spain	2018
		/	Mandarin	Cyprus	2018
		/	Mandarin	Turkey	2018
		/	Mandarin	Egypt	2018
		/	Mandarin	Turkey	2018
		/	Mandarin	Turkey	2018
		/	Mandarin	Turkey	2018
		/	Mandarin	Turkey	2018
		/	Mandarin	Turkey	2018
		/	Mandarin	Turkey	2018
		/	Mandarin	Turkey	2018
		/	Mandarin	Greece	2018
		/	Mandarin	Albania	2018
		/	Mandarin	Greece	2018
		/	Mango	Brazil	2018
		/	Mango	Brazil	2018
		/	Mango	Peru	2018
		/	Pomegranate	Greece	2018
		/	Pomegranate	Greece	2018
		/	Pomegranate	Greece	2018
		/	Pomegranate	Greece	2018
		/	Pomegranate	Turkey	2018
		/	Pomegranate	Greece	2018
		/	Pomegranate	Turkey	2018
		/	Pomegranate	Turkey	2018
		/	Pomegranate	Turkey	2018
		/	Pomegranate	Turkey	2018
		/	Pomegranate	Egypt	2018
		/	Peach (nectarine)	Greece	2018
		/	Peach (nectarine)	Greece	2018
		/	Peach (nectarine)	Greece	2018
		/	Peach (nectarine)	Greece	2018
		/	Peach (nectarine)	Albania	2018
		/	Peach (nectarine)	North Macedonia	2018
		/	Orange	Greece	2018
		/	Orange	Greece	2018
		/	Orange	Greece	2018
		/	Orange	Greece	2018
		/	Orange	Greece	2018
		/	Orange	Greece	2018
		/	Orange	Greece	2018
		/	Orange	Greece	2018
		/	Orange	Greece	2018
		/	Orange	Greece	2018
		/	Orange	Greece	2018
		/	Orange	Greece	2018
		/	Orange	Greece	2018
		/	Orange	Greece	2018
		/	Orange	Greece	2018
		/	Orange	Egypt	2018
		/	Orange	Greece	2018
		/	Orange	Spain	2018
		/	Orange	Greece	2018
		/	Orange	South Africa	2018
		/	Orange	Greece	2018
		/	Orange	South Africa	2018
		/	Orange	South Africa	2018
		/	Orange	Greece	2018
		/	Orange	Greece	2018
		/	Orange	Turkey	2018
		/	Orange	Greece	2018
		/	Orange	Turkey	2018
		/	Orange	Greece	2018
		/	Orange	Greece	2018
		/	Orange	Greece	2018
		/	Orange	Greece	2018
		/	Orange	Greece	2018
		/	Orange	Greece	2018
		/	Orange	Greece	2018
		/	Orange	Greece	2018
		/	Orange	Greece	2018
		/	Orange	Greece	2018
		/	Orange	South Africa	2018
		/	Plum	Serbia	2018
		/	Plum	North Macedonia	2018
		/	Plum	North Macedonia	2018
		/	Plum	North Macedonia	2018
		/	Plum	Greece	2018
		/	Plum	Serbia	2018
		/	Sweet cherry	Hungary	2018
		/	Sweet cherry	Greece	2018
		/	Date palm	Iran	2018
		/	Sour cherry	Serbia	2018
		/	Sour cherry	Hungary	2018
	Acephate	0.01	Banana	Colombia	2018
	Acephate	0.01	Banana	Ecuador	2018
	Acephate	0.01	Grapes	Italy	2018
	Acephate	0.011	Apple	Serbia	2018
	Acephate	0.01	Mandarin	Spain	2018
	Acetamiprid	0.017	Peach	Spain	2018
	Acetamiprid	1.148	Grapefruit	Turkey	2018
	Acetamiprid	0.295	Grapefruit	Turkey	2018
	Acetamiprid	0.189	Grapefruit	Turkey	2018
	Acetamiprid	0.326	Grapefruit	Turkey	2018
	Acetamiprid	0.076	Grapefruit	Turkey	2018
	Acetamiprid	0.086	Grapefruit	Turkey	2018
	Acetamiprid	1.418	Grapefruit	Turkey	2018
	Acetamiprid	0.057	Grapefruit	Turkey	2018
	Acetamiprid	0.013	Grapefruit	Turkey	2018
	Acetamiprid	0.011	Grapefruit	Turkey	2018
	Acetamiprid	0.075	Grapefruit	Turkey	2018
	Acetamiprid	0.211	Grapefruit	Turkey	2018
	Acetamiprid	0.119	Grapes	Italy	2018
	Acetamiprid	0.035	Grapes	Italy	2018
	Acetamiprid	0.092	Apple	Serbia	2018
	Acetamiprid	0.01	Apple	Serbia	2018
	Acetamiprid	0.013	Apple	Serbia	2018
	Acetamiprid	0.036	Apple	Poland	2018
	Acetamiprid	0.023	Apple	Poland	2018
	Acetamiprid	0.013	Apple	Poland	2018
	Acetamiprid	0.018	Apple	Poland	2018
	Acetamiprid	0.016	Apple	Poland	2018
	Acetamiprid	0.037	Apple	Croatia	2018
	Acetamiprid	0.013	Apple	Bosnia and Herzegovina	2018
	Acetamiprid	0.018	Apple	Poland	2018
	Acetamiprid	0.05	Apple	Poland	2018
	Acetamiprid	0.022	Apple	Poland	2018
	Acetamiprid	0.017	Apple	Croatia	2018
	Acetamiprid	0.017	Lemon	Turkey	2018
	Acetamiprid	0.054	Lemon	Turkey	2018
	Acetamiprid	0.011	Lemon	Turkey	2018
	Acetamiprid	0.012	Lemon	Turkey	2018
	Acetamiprid	0.022	Lemon	Turkey	2018
	Acetamiprid	0.01	Lemon	Turkey	2018
	Acetamiprid	0.024	Mandarin	Swaziland	2018
	Acetamiprid	0.987	Mandarin	Turkey	2018
	Acetamiprid	0.011	Mandarin	Turkey	2018
	Acetamiprid	0.059	Mandarin	Turkey	2018
	Acetamiprid	0.038	Mandarin	Turkey	2018
	Acetamiprid	0.045	Mandarin	Turkey	2018
	Acetamiprid	0.404	Pomegranate	Turkey	2018
	Acetamiprid	0.041	Pomegranate	Turkey	2018
	Acetamiprid	0.085	Pomegranate	Turkey	2018
	Acetamiprid	0.075	Pomegranate	Turkey	2018
	Acetamiprid	0.042	Pomegranate	Turkey	2018
	Acetamiprid	0.021	Pomegranate	Turkey	2018
	Acetamiprid	0.091	Pomegranate	Turkey	2018
	Acetamiprid	0.01	Pomegranate	Turkey	2018
	Acetamiprid	0.033	Pomegranate	Turkey	2018
	Acetamiprid	0.049	Pomegranate	Turkey	2018
	Acetamiprid	0.073	Pomegranate	Turkey	2018
	Acetamiprid	0.025	Pomelo	China	2018
	Acetamiprid	0.015	Orange	Turkey	2018
	Acetamiprid	0.013	Orange	Turkey	2018
	Acetamiprid	0.016	Orange	Turkey	2018
	Acetamiprid	0.03	Orange	Egypt	2018
	Acetamiprid	0.054	Orange	Turkey	2018
	Acetamiprid	0.111	Sweet cherry	Greece	2018
	Acetamiprid	0.031	Sweet cherry	Serbia	2018
	Acetamiprid	0.01	Sour cherry	Serbia	2018
	Acetamiprid	0.066	Sour cherry	Serbia	2018
	Acetamiprid	0.035	Sour cherry	Hungary	2018
	Acibenzolar-S-methyl	0.023	Grapefruit	Turkey	2018
	Acibenzolar-S-methyl	0.034	Grapefruit	Turkey	2018
	Acibenzolar-S-methyl	0.024	Grapefruit	Turkey	2018
	Acibenzolar-S-methyl	0.01	Mandarin	Turkey	2018
	Acibenzolar-S-methyl	0.01	Mandarin	Croatia	2018
	Acibenzolar-S-methyl	0.01	Mandarin	Greece	2018
	Acibenzolar-S-methyl	0.01	Mandarin	Turkey	2018
	Acibenzolar-S-methyl	0.01	Mandarin	Turkey	2018
	Acibenzolar-S-methyl	0.01	Mandarin	Croatia	2018
	Acibenzolar-S-methyl	0.01	Mandarin	Croatia	2018
	Acibenzolar-S-methyl	0.114	Mandarin	Turkey	2018
	Acibenzolar-S-methyl	0.01	Mandarin	Turkey	2018
	Acibenzolar-S-methyl	0.01	Mandarin	Croatia	2018
	Acibenzolar-S-methyl	0.01	Mandarin	Turkey	2018
	Acibenzolar-S-methyl	0.01	Mandarin	Greece	2018
	Acibenzolar-S-methyl	0.01	Mandarin	Croatia	2018
	Acibenzolar-S-methyl	0.01	Mandarin	Turkey	2018
	Acibenzolar-S-methyl	0.01	Mandarin	Cyprus	2018
	Acibenzolar-S-methyl	0.01	Pomegranate	Turkey	2018
	Acibenzolar-S-methyl	0.01	Pomegranate	Turkey	2018
	Acibenzolar-S-methyl	0.01	Pomegranate	Turkey	2018
	Acibenzolar-S-methyl	0.01	Orange	Egypt	2018
	Acibenzolar-S-methyl	0.01	Orange	Greece	2018
	Acibenzolar-S-methyl	0.01	Orange	Greece	2018
	Acibenzolar-S-methyl	0.01	Orange	Greece	2018
	Acibenzolar-S-methyl	0.01	Orange	South Africa	2018
	Acibenzolar-S-methyl	0.01	Orange	Greece	2018
	Acibenzolar-S-methyl	0.01	Orange	Greece	2018
	Acibenzolar-S-methyl	0.01	Orange	Turkey	2018
	Ametryn	0.01	Banana	Colombia	2018
	Ametryn	0.01	Banana	Panama	2018
	Ametryn	0.01	Banana	Ecuador	2018
	Ametryn	0.01	Grapes	North Macedonia	2018
	Ametryn	0.01	Grapes	Italy	2018
	Ametryn	0.01	Grapes	Italy	2018
	Ametryn	0.01	Apple	Serbia	2018
	Ametryn	0.01	Apple	Serbia	2018
	Ametryn	0.01	Apple	Serbia	2018
	Ametryn	0.01	Strawberry	Serbia	2018
	Ametryn	0.01	Kiwi	Greece	2018
	Ametryn	0.01	Pear	Serbia	2018
	Amitraz	0.014	Grapefruit	Turkey	2018
	Amitraz	0.027	Grapefruit	Turkey	2018
	Amitraz	0.016	Apple	Poland	2018
	Amitraz	0.011	Apple	Poland	2018
	Amitraz	0.463	Pomegranate	Turkey	2018
	Amitraz	0.685	Pomegranate	Turkey	2018
	Amitraz	0.887	Pomegranate	Turkey	2018
	Amitraz	1.339	Pomegranate	Turkey	2018
	Amitraz	0.069	Pomegranate	Turkey	2018
	Amitraz	0.011	Orange	Greece	2018
	Atrazine	0.01	Ananas	Costa Rica	2018
	Atrazine	0.014	Grapes	Italy	2018
	Atrazine	0.018	Apple	Serbia	2018
	Atrazine	0.016	Japanese apple	Spain	2018
	Atrazine	0.013	Pomegranate	Turkey	2018
	Atrazine	0.014	Pomegranate	Turkey	2018
	Atrazine	0.011	Pomegranate	Turkey	2018
	Atrazine	0.015	Plum	Italy	2018
	Azinphos-methyl	0.027	Apple	Serbia	2018
	Azoxystrobin	0.046	Banana	Italy	2018
	Azoxystrobin	0.091	Banana	Costa Rica	2018
	Azoxystrobin	0.223	Banana	Costa Rica	2018
	Azoxystrobin	0.026	Banana	Costa Rica	2018
	Azoxystrobin	0.012	Banana	Costa Rica	2018
	Azoxystrobin	0.042	Banana	Costa Rica	2018
	Azoxystrobin	0.087	Banana	Colombia	2018
	Azoxystrobin	0.083	Banana	Colombia	2018
	Azoxystrobin	0.03	Banana	Costa Rica	2018
	Azoxystrobin	0.052	Banana	Panama	2018
	Azoxystrobin	0.255	Banana	Costa Rica	2018
	Azoxystrobin	0.034	Banana	Colombia	2018
	Azoxystrobin	0.063	Banana	Colombia	2018
	Azoxystrobin	0.031	Banana	Ecuador	2018
	Azoxystrobin	0.018	Banana	Costa Rica	2018
	Azoxystrobin	0.067	Grapefruit	Swaziland	2018
	Azoxystrobin	0.065	Grapefruit	Turkey	2018
	Azoxystrobin	0.032	Grapefruit	Turkey	2018
	Azoxystrobin	0.134	Grapefruit	South Africa	2018
	Azoxystrobin	0.033	Grapefruit	Turkey	2018
	Azoxystrobin	0.01	Grapes	Serbia	2018
	Azoxystrobin	0.223	Strawberry	Serbia	2018
	Azoxystrobin	0.054	Strawberry	Serbia	2018
	Azoxystrobin	0.012	Strawberry	Greece	2018
	Azoxystrobin	0.111	Lime	Mexico	2018
	Azoxystrobin	0.011	Lime	Mexico	2018
	Azoxystrobin	0.143	Lime	Mexico	2018
	Azoxystrobin	0.504	Lemon	Argentina	2018
	Azoxystrobin	0.199	Lemon	Argentina	2018
	Azoxystrobin	0.014	Lemon	Argentina	2018
	Azoxystrobin	0.231	Lemon	Argentina	2018
	Azoxystrobin	0.249	Lemon	Argentina	2018
	Azoxystrobin	0.042	Lemon	Argentina	2018
	Azoxystrobin	0.225	Lemon	Argentina	2018
	Azoxystrobin	0.203	Mandarin	Turkey	2018
	Azoxystrobin	0.016	Orange	Zimbabwe	2018
	Azoxystrobin	0.013	Orange	Spain	2018
	Azoxystrobin	0.011	Orange	Egypt	2018
	Azoxystrobin	0.01	Orange	Egypt	2018
	Azoxystrobin	0.011	Orange	South Africa	2018
	Azoxystrobin	0.014	Orange	Zimbabwe	2018
	Bendiocarb	0.01	Mandarin	Turkey	2018
	Bifenazate	0.012	Grapes	North Macedonia	2018
	Bifenazate	0.013	Apple	Albania	2018
	Bifenazate	0.02	Apple	Poland	2018
	Bifenthrin	0.025	Banana	Costa Rica	2018
	Bifenthrin	0.023	Banana	Costa Rica	2018
	Bifenthrin	0.029	Banana	Costa Rica	2018
	Bifenthrin	0.039	Banana	Costa Rica	2018
	Bifenthrin	0.01	Pomegranate	Turkey	2018
	Boscalid	0.308	Blueberry	Serbia	2018
	Boscalid	0.086	Peach	Serbia	2018
	Boscalid	0.086	Peach	Serbia	2018
	Boscalid	0.024	Peach	Greece	2018
	Boscalid	0.014	Grapefruit	Turkey	2018
	Boscalid	0.014	Grapes	North Macedonia	2018
	Boscalid	0.196	Grapes	North Macedonia	2018
	Boscalid	0.054	Grapes	North Macedonia	2018
	Boscalid	0.062	Grapes	Italy	2018
	Boscalid	0.986	Grapes	Italy	2018
	Boscalid	0.05	Grapes	North Macedonia	2018
	Boscalid	0.071	Grapes	North Macedonia	2018
	Boscalid	2.989	Grapes	Italy	2018
	Boscalid	0.908	Grapes	Greece	2018
	Boscalid	1.462	Grapes	North Macedonia	2018
	Boscalid	0.142	Grapes	North Macedonia	2018
	Boscalid	0.03	Grapes	Italy	2018
	Boscalid	1.139	Grapes	Italy	2018
	Boscalid	0.01	Grapes	Serbia	2018
	Boscalid	0.058	Apple	Serbia	2018
	Boscalid	0.185	Apple	Serbia	2018
	Boscalid	0.425	Apple	Serbia	2018
	Boscalid	0.182	Apple	Serbia	2018
	Boscalid	0.154	Apple	Serbia	2018
	Boscalid	0.099	Apple	Serbia	2018
	Boscalid	0.078	Apple	Serbia	2018
	Boscalid	0.016	Apple	Poland	2018
	Boscalid	0.459	Apple	Poland	2018
	Boscalid	0.303	Apple	Croatia	2018
	Boscalid	0.028	Apple	Poland	2018
	Boscalid	0.031	Apple	Poland	2018
	Boscalid	0.013	Apple	Poland	2018
	Boscalid	0.267	Apple	Croatia	2018
	Boscalid	0.38	Strawberry	Albania	2018
	Boscalid	0.522	Strawberry	Serbia	2018
	Boscalid	0.515	Strawberry	Serbia	2018
	Boscalid	0.882	Strawberry	Serbia	2018
	Boscalid	0.052	Strawberry	Serbia	2018
	Boscalid	0.317	Strawberry	Albania	2018
	Boscalid	0.048	Strawberry	Albania	2018
	Boscalid	0.143	Pear	Serbia	2018
	Boscalid	0.284	Pear	Serbia	2018
	Boscalid	0.018	Pear	Serbia	2018
	Boscalid	0.636	Pear	Serbia	2018
	Boscalid	0.043	Pear	The Netherlands	2018
	Boscalid	0.237	Pear	Serbia	2018
	Boscalid	0.043	Pear	Italy	2018
	Boscalid	0.025	Pear	The Netherlands	2018
	Boscalid	0.019	Pomegranate	Turkey	2018
	Boscalid	0.087	Plum	Serbia	2018
	Boscalid	1.608	Plum	Italy	2018
	Boscalid	0.989	Sweet cherry	Greece	2018
	Boscalid	0.134	Sweet cherry	Poland	2018
	Boscalid	0.023	Sweet cherry	Serbia	2018
	Buprofezin	0.085	Banana	Costa Rica	2018
	Buprofezin	0.042	Banana	Costa Rica	2018
	Buprofezin	0.047	Banana	Costa Rica	2018
	Buprofezin	0.01	Grapefruit	South Africa	2018
	Buprofezin	0.135	Grapefruit	Turkey	2018
	Buprofezin	0.021	Grapefruit	Turkey	2018
	Buprofezin	0.019	Grapefruit	Turkey	2018
	Buprofezin	0.014	Grapefruit	Turkey	2018
	Buprofezin	0.066	Grapefruit	Turkey	2018
	Buprofezin	0.043	Grapefruit	Turkey	2018
	Buprofezin	0.013	Grapefruit	Turkey	2018
	Buprofezin	0.014	Grapefruit	Turkey	2018
	Buprofezin	0.016	Grapefruit	South Africa	2018
	Buprofezin	0.054	Grapefruit	Turkey	2018
	Buprofezin	0.025	Grapefruit	Turkey	2018
	Buprofezin	0.059	Lemon	Turkey	2018
	Buprofezin	0.014	Lemon	South Africa	2018
	Buprofezin	0.017	Lemon	South Africa	2018
	Buprofezin	0.063	Lemon	Turkey	2018
	Buprofezin	0.011	Lemon	Turkey	2018
	Buprofezin	0.054	Lemon	Turkey	2018
	Buprofezin	0.066	Lemon	Turkey	2018
	Buprofezin	0.032	Lemon	Turkey	2018
	Buprofezin	0.092	Lemon	Turkey	2018
	Buprofezin	0.052	Lemon	Turkey	2018
	Buprofezin	0.056	Lemon	South Africa	2018
	Buprofezin	0.015	Lemon	South Africa	2018
	Buprofezin	0.011	Lemon	South Africa	2018
	Buprofezin	0.014	Mandarin	Turkey	2018
	Buprofezin	0.017	Mandarin	Swaziland	2018
	Buprofezin	0.027	Mandarin	Turkey	2018
	Buprofezin	0.018	Mandarin	Turkey	2018
	Buprofezin	0.027	Mandarin	Turkey	2018
	Buprofezin	0.016	Mandarin	Turkey	2018
	Buprofezin	0.063	Mandarin	Turkey	2018
	Buprofezin	0.012	Pomegranate	Turkey	2018
	Buprofezin	0.021	Orange	Zimbabwe	2018
	Buprofezin	0.028	Orange	Zimbabwe	2018
	Buprofezin	0.01	Orange	South Africa	2018
	Buprofezin	0.027	Orange	Turkey	2018
	Buprofezin	0.014	Orange	Turkey	2018
	Buprofezin	0.013	Orange	South Africa	2018
	Buprofezin	0.017	Orange	South Africa	2018
	Buprofezin	0.011	Orange	South Africa	2018
	Buprofezin	0.012	Orange	South Africa	2018
	Buprofezin	0.045	Orange	Zimbabwe	2018
	Buprofezin	0.01	Orange	South Africa	2018
	Butoxycarboxim	0.037	Grapefruit	Turkey	2018
	Butoxycarboxim	0.035	Grapefruit	Turkey	2018
	Butoxycarboxim	0.034	Pomegranate	Turkey	2018
	Butoxycarboxim	0.035	Pomegranate	Turkey	2018
	Butoxycarboxim	0.035	Pomegranate	Turkey	2018
	Carbaryl	0.01	Grapefruit	Turkey	2018
	Carbaryl	0.01	Grapefruit	Turkey	2018
	Carbaryl	0.01	Lime	Mexico	2018
	Carbaryl	0.01	Orange	Greece	2018
	Carbaryl	0.01	Orange	Turkey	2018
	Carbaryl	0.01	Orange	Spain	2018
	Carbaryl	0.01	Orange	Turkey	2018
	Carbaryl	0.01	Orange	Turkey	2018
	Carbaryl	0.01	Orange	Turkey	2018
	Carbaryl	0.01	Orange	Turkey	2018
	Carbaryl	0.01	Orange	Greece	2018
	Carbaryl	0.01	Orange	Turkey	2018
	Carbendazim	0.023	Blueberry	Serbia	2018
	Carbendazim	0.056	Peach	Spain	2018
	Carbendazim	0.01	Peach	Serbia	2018
	Carbendazim	0.017	Grapefruit	South Africa	2018
	Carbendazim	0.031	Grapefruit	Turkey	2018
	Carbendazim	0.023	Grapefruit	Turkey	2018
	Carbendazim	0.012	Grapefruit	Turkey	2018
	Carbendazim	0.26	Grapefruit	Turkey	2018
	Carbendazim	0.061	Grapes	North Macedonia	2018
	Carbendazim	0.035	Apple	Serbia	2018
	Carbendazim	0.014	Apple	Serbia	2018
	Carbendazim	0.025	Apple	Serbia	2018
	Carbendazim	0.022	Apple	Serbia	2018
	Carbendazim	0.021	Apple	Serbia	2018
	Carbendazim	0.196	Apple	Serbia	2018
	Carbendazim	0.188	Apple	Serbia	2018
	Carbendazim	0.016	Apple	Serbia	2018
	Carbendazim	0.048	Apple	Poland	2018
	Carbendazim	0.45	Apple	Bosnia and Herzegovina	2018
	Carbendazim	0.294	Apple	Bosnia and Herzegovina	2018
	Carbendazim	0.015	Apple	Poland	2018
	Carbendazim	0.183	Apple	North Macedonia	2018
	Carbendazim	0.2	Apple	Poland	2018
	Carbendazim	0.054	Apple	Poland	2018
	Carbendazim	0.105	Apple	Poland	2018
	Carbendazim	0.16	Apricot	Serbia	2018
	Carbendazim	0.109	Lime	Mexico	2018
	Carbendazim	0.017	Lime	Turkey	2018
	Carbendazim	0.178	Lime	Mexico	2018
	Carbendazim	0.01	Lime	Mexico	2018
	Carbendazim	0.023	Lemon	South Africa	2018
	Carbendazim	0.047	Lemon	South Africa	2018
	Carbendazim	0.127	Lemon	Turkey	2018
	Carbendazim	0.047	Lemon	Turkey	2018
	Carbendazim	0.021	Lemon	Turkey	2018
	Carbendazim	0.014	Lemon	Argentina	2018
	Carbendazim	0.01	Lemon	Argentina	2018
	Carbendazim	0.342	Lemon	Argentina	2018
	Carbendazim	0.048	Lemon	South Africa	2018
	Carbendazim	0.14	Lemon	South Africa	2018
	Carbendazim	0.014	Lemon	Argentina	2018
	Carbendazim	0.204	Lemon	Argentina	2018
	Carbendazim	0.017	Mandarin	Swaziland	2018
	Carbendazim	0.024	Mandarin	Turkey	2018
	Carbendazim	0.172	Mandarin	Turkey	2018
	Carbendazim	1.175	Pomegranate	Turkey	2018
	Carbendazim	0.823	Pomegranate	Turkey	2018
	Carbendazim	0.59	Pomegranate	Turkey	2018
	Carbendazim	0.818	Pomegranate	Turkey	2018
	Carbendazim	0.024	Peach (nectarine)	North Macedonia	2018
	Carbendazim	0.075	Peach (nectarine)	Serbia	2018
	Carbendazim	0.014	Pomelo	China	2018
	Carbendazim	0.169	Orange	Zimbabwe	2018
	Carbendazim	0.078	Orange	Zimbabwe	2018
	Carbendazim	0.06	Orange	South Africa	2018
	Carbendazim	0.046	Orange	Spain	2018
	Carbendazim	0.071	Orange	South Africa	2018
	Carbendazim	0.013	Orange	Spain	2018
	Carbendazim	0.2	Orange	Turkey	2018
	Carbendazim	0.125	Orange	Turkey	2018
	Carbendazim	0.108	Orange	Zimbabwe	2018
	Carbendazim	0.02	Orange	South Africa	2018
	Carbendazim	0.015	Orange	South Africa	2018
	Carbendazim	0.104	Orange	South Africa	2018
	Carbendazim	0.18	Orange	Zimbabwe	2018
	Carbendazim	0.2	Orange	Turkey	2018
	Carbendazim	2.67	Orange	Turkey	2018
	Carbendazim	0.38	Plum	Serbia	2018
	Carboxin	0.01	Pomegranate	Turkey	2018
	Carboxin	0.01	Pomegranate	Turkey	2018
	Carfentrazone-ethyl	0.01	Mandarin	Croatia	2018
	Chlorantraniliprole	0.037	Apple	Serbia	2018
	Chlorantraniliprole	0.017	Apple	Serbia	2018
	Chlorantraniliprole	0.034	Apple	Serbia	2018
	Chlorantraniliprole	0.017	Apple	Serbia	2018
	Chlorantraniliprole	0.014	Apple	Serbia	2018
	Chlorantraniliprole	0.025	Pear	Serbia	2018
	Chlorantraniliprole	0.047	Pear	Serbia	2018
	Chlorantraniliprole	0.012	Pear	The Netherlands	2018
	Chlorantraniliprole	0.013	Pear	The Netherlands	2018
	Chlorantraniliprole	0.027	Pear	South Africa	2018
	Chlorothalonil	0.01	Orange	South Africa	2018
	Chlorotoluron	0.798	Grapefruit	Turkey	2018
	Chlorotoluron	0.928	Grapefruit	Turkey	2018
	Chlorotoluron	0.014	Apple	Poland	2018
	Chlorotoluron	0.012	Lime	Mexico	2018
	Chlorotoluron	0.01	Lemon	Argentina	2018
	Chlorotoluron	0.013	Lemon	Greece	2018
	Chlorotoluron	0.01	Lemon	Turkey	2018
	Chlorotoluron	0.382	Mandarin	Turkey	2018
	Chlorotoluron	0.01	Mandarin	Turkey	2018
	Chlorotoluron	0.429	Pomegranate	Turkey	2018
	Chlorotoluron	0.356	Pomegranate	Turkey	2018
	Chlorotoluron	0.401	Pomegranate	Turkey	2018
	Chlorotoluron	0.394	Pomegranate	Turkey	2018
	Chlorotoluron	0.359	Pomegranate	Turkey	2018
	Chlorotoluron	0.01	Orange	Greece	2018
	Chlorotoluron	0.021	Orange	Greece	2018
	Chlorpyrifos	0.064	Grapefruit	Greece	2018
	Chlorpyrifos	0.031	Grapefruit	Turkey	2018
	Chlorpyrifos	0.045	Grapefruit	Turkey	2018
	Chlorpyrifos	0.269	Grapefruit	Turkey	2018
	Chlorpyrifos	0.237	Grapefruit	Turkey	2018
	Chlorpyrifos	0.642	Grapefruit	Turkey	2018
	Chlorpyrifos	0.367	Grapefruit	Turkey	2018
	Chlorpyrifos	0.721	Grapefruit	Turkey	2018
	Chlorpyrifos	2.338	Grapefruit	Turkey	2018
	Chlorpyrifos	0.155	Grapefruit	Turkey	2018
	Chlorpyrifos	0.363	Grapefruit	Turkey	2018
	Chlorpyrifos	0.975	Grapefruit	Turkey	2018
	Chlorpyrifos	0.399	Grapefruit	Turkey	2018
	Chlorpyrifos	0.431	Grapefruit	Turkey	2018
	Chlorpyrifos	0.044	Grapes	North Macedonia	2018
	Chlorpyrifos	0.04	Lime	Mexico	2018
	Chlorpyrifos	0.171	Lime	Turkey	2018
	Chlorpyrifos	0.032	Lemon	Turkey	2018
	Chlorpyrifos	0.2	Lemon	Turkey	2018
	Chlorpyrifos	0.2	Lemon	Turkey	2018
	Chlorpyrifos	0.014	Mandarin	Swaziland	2018
	Chlorpyrifos	0.16	Mandarin	Turkey	2018
	Chlorpyrifos	0.159	Mandarin	Greece	2018
	Chlorpyrifos	0.168	Mandarin	Turkey	2018
	Chlorpyrifos	0.016	Mandarin	Turkey	2018
	Chlorpyrifos	0.062	Mandarin	Croatia	2018
	Chlorpyrifos	0.315	Mandarin	Turkey	2018
	Chlorpyrifos	0.055	Mandarin	Greece	2018
	Chlorpyrifos	0.139	Mandarin	Croatia	2018
	Chlorpyrifos	0.473	Mandarin	Turkey	2018
	Chlorpyrifos	0.012	Mandarin	Turkey	2018
	Chlorpyrifos	0.05	Mandarin	Croatia	2018
	Chlorpyrifos	0.205	Mandarin	Greece	2018
	Chlorpyrifos	0.01	Pomegranate	Turkey	2018
	Chlorpyrifos	0.721	Pomegranate	Turkey	2018
	Chlorpyrifos	0.011	Pomelo	China	2018
	Chlorpyrifos	0.068	Pomelo	China	2018
	Chlorpyrifos	0.021	Pomelo	China	2018
	Chlorpyrifos	0.01	Orange	Greece	2018
	Chlorpyrifos	0.013	Orange	The Netherlands	2018
	Chlorpyrifos	0.056	Orange	Greece	2018
	Chlorpyrifos	0.013	Orange	South Africa	2018
	Chlorpyrifos	0.065	Orange	Turkey	2018
	Chlorpyrifos	0.031	Orange	Greece	2018
	Clethodim	0.01	Mandarin	Turkey	2018
	Clofentezine	0.084	Strawberry	Albania	2018
	Clothianidin	0.026	Pear	Serbia	2018
	Clothianidin	0.033	Pear	Serbia	2018
	Clothianidin	0.045	Pear	Serbia	2018
	Cyfluthrin	0.012	Banana	Costa Rica	2018
	Cymoxanil	0.01	Pomegranate	Turkey	2018
	Cymoxanil	0.01	Pomegranate	Turkey	2018
	Cymoxanil	0.01	Pomegranate	Turkey	2018
	Cypermethrin	0.011	Mandarin	Turkey	2018
	Cypermethrin	0.074	Pomegranate	Turkey	2018
	Cypermethrin	0.262	Pomegranate	Turkey	2018
	Cypermethrin	0.012	Pomelo	China	2018
	Cyprodinil	0.02	Grapefruit	Turkey	2018
	Cyprodinil	0.017	Grapefruit	Turkey	2018
	Cyprodinil	0.017	Grapefruit	Turkey	2018
	Cyprodinil	0.248	Apple	Poland	2018
	Cyprodinil	0.492	Strawberry	Albania	2018
	Cyprodinil	0.069	Strawberry	Serbia	2018
	Cyprodinil	0.054	Pear	The Netherlands	2018
	Cyprodinil	0.035	Mandarin	Turkey	2018
	Cyprodinil	0.038	Pomegranate	Turkey	2018
	Cyprodinil	0.044	Pomegranate	Turkey	2018
	Cyprodinil	0.05	Pomegranate	Turkey	2018
	Cyprodinil	0.042	Pomegranate	Turkey	2018
	Cyprodinil	0.049	Pomegranate	Turkey	2018
	Deltamethrin	0.05	Grapefruit	Turkey	2018
	Deltamethrin	0.304	Mandarin	Turkey	2018
	Deltamethrin	0.021	Pomegranate	Turkey	2018
	Deltamethrin	0.326	Pomegranate	Turkey	2018
	Deltamethrin	0.01	Pomegranate	Turkey	2018
	Deltamethrin	0.255	Pomegranate	Turkey	2018
	Deltamethrin	0.263	Pomegranate	Turkey	2018
	Deltamethrin	0.01	Pomegranate	Turkey	2018
	Deltamethrin	0.01	Pomegranate	Turkey	2018
	Deltamethrin	0.286	Pomegranate	Turkey	2018
	Deltamethrin	0.032	Pomegranate	Turkey	2018
	Deltamethrin	0.098	Pomegranate	Turkey	2018
	Deltamethrin	0.026	Pomegranate	Turkey	2018
	Deltamethrin	0.029	Pomegranate	Turkey	2018
	Dicrotophos	0.01	Mandarin	Turkey	2018
	Difenoconazole	0.01	Grapefruit	Turkey	2018
	Difenoconazole	0.01	Grapefruit	Turkey	2018
	Difenoconazole	0.01	Grapefruit	Turkey	2018
	Difenoconazole	0.04	Mandarin	Turkey	2018
	Difenoconazole	0.174	Pomegranate	Turkey	2018
	Difenoconazole	0.01	Pomegranate	Turkey	2018
	Difenoconazole	0.131	Pomegranate	Turkey	2018
	Difenoconazole	0.018	Pomegranate	Turkey	2018
	Difenoconazole	0.01	Pomegranate	Turkey	2018
	Difenoconazole	0.038	Pomegranate	Turkey	2018
	Difenoconazole	0.056	Pomegranate	Turkey	2018
	Difenoconazole	0.036	Pomegranate	Turkey	2018
	Difenoconazole	0.046	Pomegranate	Turkey	2018
	Difenoconazole	0.01	Orange	Zimbabwe	2018
	Diflubenzuron	0.01	Apple	Serbia	2018
	Diflubenzuron	0.014	Apple	Poland	2018
	Diflubenzuron	0.01	Apple	Bosnia and Herzegovina	2018
	Dimethoate	0.014	Grapefruit	Turkey	2018
	Dimethoate	0.01	Apple	Bosnia and Herzegovina	2018
	Dimethoate	0.012	Lemon	Turkey	2018
	Dimethoate	0.016	Orange	Egypt	2018
	Dimethoate	0.035	Sour cherry	Serbia	2018
	Dimethomorph	0.024	Grapefruit	Turkey	2018
	Dimethomorph	0.01	Grapefruit	South Africa	2018
	Dimethomorph	0.435	Grapes	Italy	2018
	Dimethomorph	0.36	Grapes	Italy	2018
	Dimethomorph	0.036	Grapes	North Macedonia	2018
	Dimethomorph	0.048	Grapes	North Macedonia	2018
	Dimethomorph	0.737	Grapes	Italy	2018
	Dimethomorph	0.129	Grapes	Greece	2018
	Dimethomorph	0.38	Grapes	North Macedonia	2018
	Dimethomorph	0.463	Grapes	North Macedonia	2018
	Dimethomorph	0.111	Grapes	North Macedonia	2018
	Dimethomorph	0.34	Grapes	Italy	2018
	Dimethomorph	0.286	Grapes	Italy	2018
	Dimethomorph	0.016	Grapes	Serbia	2018
	Dimethomorph	0.012	Mandarin	Turkey	2018
	Dimethomorph	0.022	Mandarin	Turkey	2018
	Dimethomorph	0.017	Mandarin	Turkey	2018
	Dimethomorph	0.017	Mandarin	Spain	2018
	Dimethomorph	0.016	Mandarin	Turkey	2018
	Dimethomorph	0.018	Mandarin	Turkey	2018
	Dimethomorph	0.017	Mandarin	Turkey	2018
	Dimethomorph	0.023	Mandarin	Turkey	2018
	Dimethomorph	0.013	Mandarin	Turkey	2018
	Dimethomorph	0.019	Mandarin	Turkey	2018
	Dimethomorph	0.01	Mandarin	Egypt	2018
	Dimethomorph	0.01	Mandarin	Cyprus	2018
	Dimethomorph	0.011	Orange	Greece	2018
	Dimethomorph	0.011	Orange	Turkey	2018
	Dimethomorph	0.013	Orange	Turkey	2018
	Dimethomorph	0.012	Orange	Egypt	2018
	Dimethomorph	0.019	Orange	Turkey	2018
	Dimethomorph	0.016	Orange	Turkey	2018
	Dimethomorph	0.016	Orange	Turkey	2018
	Dimethomorph	0.018	Orange	Spain	2018
	Dimethomorph	0.014	Orange	Greece	2018
	Dimoxystrobin	0.01	Grapefruit	Turkey	2018
	Dimoxystrobin	0.01	Lime	Mexico	2018
	Dinotefuran	0.01	Apple	Serbia	2018
	Dinotefuran	0.01	Lemon	Turkey	2018
	Dinotefuran	0.038	Pomegranate	Turkey	2018
	Emamectin	0.044	Grapes	Italy	2018
	Emamectin	0.02	Grapes	North Macedonia	2018
	Emamectin B1a	0.011	Peach	Greece	2018
	Emamectin B1b	0.016	Peach	Greece	2018
	Emamectin B1b	0.01	Mandarin	Turkey	2018
	Emamectin B1b	0.01	Pomegranate	Turkey	2018
	Emamectin B1b	0.01	Pomegranate	Turkey	2018
	Ethiofencarb	0.069	Grapefruit	Turkey	2018
	Ethiofencarb	0.047	Grapefruit	Turkey	2018
	Ethiofencarb	0.023	Grapefruit	Turkey	2018
	Ethiofencarb	0.01	Pomelo	China	2018
	Ethiofencarb	0.01	Orange	Turkey	2018
	Ethiofencarb	0.01	Orange	Turkey	2018
	Ethiofencarb	0.01	Orange	Greece	2018
	Ethiofencarb	0.01	Orange	Greece	2018
	Ethiofencarb	0.01	Orange	Egypt	2018
	Ethiofencarb	0.01	Orange	Turkey	2018
	Ethirimol	0.019	Strawberry	Albania	2018
	Ethirimol	0.016	Strawberry	Albania	2018
	Ethirimol	0.01	Mandarin	Turkey	2018
	Ethofumesate	0.022	Mandarin	Turkey	2018
	Etoxazole	0.016	Grapefruit	Turkey	2018
	Etoxazole	0.01	Grapefruit	Turkey	2018
	Etoxazole	0.015	Apple	Serbia	2018
	Etoxazole	0.01	Lime	South Africa	2018
	Etoxazole	0.01	Lime	Mexico	2018
	Etoxazole	0.024	Lemon	Turkey	2018
	Etoxazole	0.012	Lemon	Turkey	2018
	Etoxazole	0.016	Lemon	Turkey	2018
	Etoxazole	0.016	Mandarin	Turkey	2018
	Etoxazole	0.013	Mandarin	Turkey	2018
	Etoxazole	0.01	Pomegranate	Turkey	2018
	Etoxazole	0.01	Pomegranate	Turkey	2018
	Etoxazole	0.01	Pomegranate	Turkey	2018
	Etoxazole	0.02	Pomegranate	Turkey	2018
	Etoxazole	0.01	Pomelo	China	2018
	Famoxadone	0.292	Grapes	Greece	2018
	Fenamidone	0.042	Grapes	Italy	2018
	Fenazaquin	0.01	Grapefruit	Turkey	2018
	Fenazaquin	0.01	Grapefruit	Turkey	2018
	Fenazaquin	0.01	Grapefruit	Turkey	2018
	Fenhexamid	0.392	Grapes	Italy	2018
	Fenhexamid	0.012	Strawberry	Serbia	2018
	Fenhexamid	0.102	Strawberry	Albania	2018
	Fenhexamid	0.147	Strawberry	Serbia	2018
	Fenhexamid	0.358	Strawberry	Serbia	2018
	Fenhexamid	0.011	Kiwi	Chile	2018
	Fenhexamid	0.042	Raspberry	Morocco	2018
	Fenhexamid	0.014	Raspberry	Spain	2018
	Fenhexamid	0.011	Sour cherry	Hungary	2018
	Fenoxycarb	0.013	Grapes	Greece	2018
	Fenpropimorph	0.01	Banana	Costa Rica	2018
	Fenpropimorph	0.015	Banana	Costa Rica	2018
	Fenpropimorph	0.049	Banana	Costa Rica	2018
	Fenpropimorph	0.012	Banana	Colombia	2018
	Fenpyroximate	0.011	Banana	Costa Rica	2018
	Fenpyroximate	0.02	Lemon	South Africa	2018
	Fenthion	0.01	Pomegranate	Turkey	2018
	Fenvalerate	0.013	Grapes	Greece	2018
	Fenvalerate	0.014	Apple	Serbia	2018
	Fenvalerate	0.014	Apple	Serbia	2018
	Fenvalerate	0.012	Apple	Serbia	2018
	Fenvalerate	0.015	Apple	Serbia	2018
	Fenvalerate	0.017	Apple	Serbia	2018
	Fenvalerate	0.034	Apple	Poland	2018
	Fenvalerate	0.02	Lemon	Turkey	2018
	Fenvalerate	0.494	Mandarin	Turkey	2018
	Fenvalerate	0.159	Mandarin	Turkey	2018
	Fenvalerate	1.247	Mandarin	Turkey	2018
	Fenvalerate	0.163	Mandarin	Turkey	2018
	Fenvalerate	0.076	Mandarin	Turkey	2018
	Fenvalerate	0.444	Mandarin	Turkey	2018
	Fenvalerate	0.159	Mandarin	Turkey	2018
	Fenvalerate	0.039	Pomegranate	Turkey	2018
	Fenvalerate	0.068	Pomegranate	Turkey	2018
	Fenvalerate	0.103	Pomegranate	Turkey	2018
	Fenvalerate	0.062	Pomegranate	Turkey	2018
	Fenvalerate	0.085	Pomegranate	Turkey	2018
	Fenvalerate	0.413	Pomegranate	Turkey	2018
	Fenvalerate	0.053	Pomegranate	Turkey	2018
	Fenvalerate	0.02	Pomegranate	Turkey	2018
	Fenvalerate	0.085	Pomegranate	Turkey	2018
	Fenvalerate	0.054	Pomegranate	Turkey	2018
	Fenvalerate	0.129	Pomegranate	Turkey	2018
	Fenvalerate	0.232	Pomegranate	Turkey	2018
	Fenvalerate	0.167	Pomegranate	Turkey	2018
	Fenvalerate	0.087	Pomegranate	Turkey	2018
	Fenvalerate	0.044	Pomegranate	Turkey	2018
	Fenvalerate	0.089	Orange	Turkey	2018
	Fenvalerate	0.02	Orange	Turkey	2018
	Flonicamid	0.026	Peach	Spain	2018
	Flonicamid	0.015	Grapefruit	Turkey	2018
	Flonicamid	0.086	Apple	Croatia	2018
	Flonicamid	0.031	Apple	Poland	2018
	Flonicamid	0.016	Mandarin	Turkey	2018
	Fludioxonil	0.341	Ananas	Costa Rica	2018
	Fludioxonil	0.023	Peach	Greece	2018
	Fludioxonil	0.078	Grapefruit	Turkey	2018
	Fludioxonil	0.087	Grapefruit	Turkey	2018
	Fludioxonil	0.054	Grapefruit	Turkey	2018
	Fludioxonil	0.011	Grapes	North Macedonia	2018
	Fludioxonil	0.503	Grapes	Italy	2018
	Fludioxonil	0.029	Grapes	North Macedonia	2018
	Fludioxonil	1.162	Grapes	Italy	2018
	Fludioxonil	0.584	Grapes	Greece	2018
	Fludioxonil	0.169	Grapes	North Macedonia	2018
	Fludioxonil	1.515	Grapes	North Macedonia	2018
	Fludioxonil	0.209	Grapes	Italy	2018
	Fludioxonil	0.37	Grapes	Italy	2018
	Fludioxonil	0.01	Apple	Serbia	2018
	Fludioxonil	0.075	Apple	Serbia	2018
	Fludioxonil	0.018	Apple	Serbia	2018
	Fludioxonil	0.019	Apple	Serbia	2018
	Fludioxonil	0.023	Apple	Poland	2018
	Fludioxonil	0.09	Apple	Poland	2018
	Fludioxonil	0.086	Apple	Croatia	2018
	Fludioxonil	0.142	Strawberry	Albania	2018
	Fludioxonil	0.289	Strawberry	Serbia	2018
	Fludioxonil	0.098	Strawberry	Serbia	2018
	Fludioxonil	0.171	Strawberry	Serbia	2018
	Fludioxonil	0.032	Kiwi	Italy	2018
	Fludioxonil	0.01	Kiwi	Italy	2018
	Fludioxonil	0.164	Pear	The Netherlands	2018
	Fludioxonil	0.026	Pear	South Africa	2018
	Fludioxonil	0.069	Lime	Mexico	2018
	Fludioxonil	0.01	Lime	Mexico	2018
	Fludioxonil	0.06	Lime	Mexico	2018
	Fludioxonil	0.394	Lemon	Argentina	2018
	Fludioxonil	0.128	Lemon	Argentina	2018
	Fludioxonil	0.011	Lemon	Argentina	2018
	Fludioxonil	0.19	Lemon	Argentina	2018
	Fludioxonil	0.205	Lemon	Argentina	2018
	Fludioxonil	0.123	Lemon	Argentina	2018
	Fludioxonil	0.03	Mandarin	Turkey	2018
	Fludioxonil	0.029	Pomegranate	Turkey	2018
	Fludioxonil	0.017	Pomegranate	Turkey	2018
	Fludioxonil	0.023	Pomegranate	Turkey	2018
	Fludioxonil	0.047	Pomegranate	Turkey	2018
	Fludioxonil	0.972	Pomegranate	Argentina	2018
	Fludioxonil	0.064	Pomegranate	Turkey	2018
	Fludioxonil	0.013	Orange	Greece	2018
	Fludioxonil	0.357	Orange	Egypt	2018
	Fludioxonil	0.025	Orange	Morocco	2018
	Flufenacet	0.031	Grapefruit	Turkey	2018
	Flufenacet	0.021	Grapefruit	Turkey	2018
	Flufenacet	0.035	Grapefruit	Turkey	2018
	Flufenoxuron	0.015	Pomegranate	Turkey	2018
	Flufenoxuron	0.032	Pomegranate	Turkey	2018
	Fluoxastrobin	0.01	Mandarin	Turkey	2018
	Flutriafol	0.013	Grapes	Italy	2018
	Flutriafol	0.031	Apple	Serbia	2018
	Flutriafol	0.025	Apple	North Macedonia	2018
	Hexaconazole	0.01	Lemon	Turkey	2018
	Hexaconazole	0.01	Lemon	Turkey	2018
	Hexaconazole	0.01	Mandarin	Turkey	2018
	Hexaconazole	0.01	Orange	Turkey	2018
	Hexythiazox	0.022	Strawberry	Albania	2018
	Imazalil	0.347	Banana	Ecuador	2018
	Imazalil	0.048	Banana	Colombia	2018
	Imazalil	0.012	Banana	Italy	2018
	Imazalil	0.845	Banana	Ecuador	2018
	Imazalil	0.121	Banana	Ecuador	2018
	Imazalil	0.01	Banana	Costa Rica	2018
	Imazalil	0.454	Banana	Mexico	2018
	Imazalil	0.01	Banana	Costa Rica	2018
	Imazalil	0.224	Banana	Colombia	2018
	Imazalil	0.035	Banana	Ecuador	2018
	Imazalil	0.057	Banana	Guatemala	2018
	Imazalil	0.305	Banana	Ecuador	2018
	Imazalil	0.098	Banana	Mexico	2018
	Imazalil	0.179	Banana	Mexico	2018
	Imazalil	0.154	Banana	Mexico	2018
	Imazalil	0.01	Banana	Colombia	2018
	Imazalil	0.175	Banana	Colombia	2018
	Imazalil	0.075	Banana	Ecuador	2018
	Imazalil	0.887	Banana	Mexico	2018
	Imazalil	0.192	Banana	Mexico	2018
	Imazalil	0.025	Peach	Greece	2018
	Imazalil	0.026	Peach	Serbia	2018
	Imazalil	0.855	Grapefruit	Greece	2018
	Imazalil	3.429	Grapefruit	South Africa	2018
	Imazalil	1.952	Grapefruit	South Africa	2018
	Imazalil	1.077	Grapefruit	South Africa	2018
	Imazalil	2.76	Grapefruit	Swaziland	2018
	Imazalil	0.05	Grapefruit	Turkey	2018
	Imazalil	39.349	Grapefruit	Turkey	2018
	Imazalil	0.91	Grapefruit	Turkey	2018
	Imazalil	0.115	Grapefruit	Turkey	2018
	Imazalil	0.251	Grapefruit	Turkey	2018
	Imazalil	0.108	Grapefruit	Turkey	2018
	Imazalil	0.631	Grapefruit	Turkey	2018
	Imazalil	0.534	Grapefruit	Turkey	2018
	Imazalil	1.762	Grapefruit	South Africa	2018
	Imazalil	1.293	Grapefruit	South Africa	2018
	Imazalil	0.089	Grapefruit	Turkey	2018
	Imazalil	2.759	Grapefruit	South Africa	2018
	Imazalil	0.503	Grapefruit	South Africa	2018
	Imazalil	1.662	Grapefruit	Turkey	2018
	Imazalil	0.225	Grapefruit	Turkey	2018
	Imazalil	2.71	Grapefruit	Turkey	2018
	Imazalil	0.448	Grapefruit	Turkey	2018
	Imazalil	2.016	Grapefruit	South Africa	2018
	Imazalil	0.648	Grapefruit	South Africa	2018
	Imazalil	1.809	Grapefruit	South Africa	2018
	Imazalil	1.488	Grapefruit	Turkey	2018
	Imazalil	0.05	Grapes	North Macedonia	2018
	Imazalil	0.012	Grapes	Serbia	2018
	Imazalil	0.02	Apple	Italy	2018
	Imazalil	0.021	Apple	Poland	2018
	Imazalil	0.038	Apple	Bosnia and Herzegovina	2018
	Imazalil	0.013	Apple	Poland	2018
	Imazalil	0.01	Strawberry	Greece	2018
	Imazalil	0.011	Kiwi	Italy	2018
	Imazalil	0.019	Kiwi	Chile	2018
	Imazalil	0.011	Pear	South Africa	2018
	Imazalil	0.204	Lime	Mexico	2018
	Imazalil	0.432	Lime	Mexico	2018
	Imazalil	0.227	Lime	Mexico	2018
	Imazalil	0.59	Lime	South Africa	2018
	Imazalil	1.231	Lime	Mexico	2018
	Imazalil	0.644	Lime	Mexico	2018
	Imazalil	0.853	Lime	Mexico	2018
	Imazalil	0.734	Lime	Mexico	2018
	Imazalil	0.899	Lemon	Greece	2018
	Imazalil	1.24	Lemon	South Africa	2018
	Imazalil	0.791	Lemon	South Africa	2018
	Imazalil	0.478	Lemon	Turkey	2018
	Imazalil	1.384	Lemon	Turkey	2018
	Imazalil	4.711	Lemon	Argentina	2018
	Imazalil	1.691	Lemon	Argentina	2018
	Imazalil	4.017	Lemon	Argentina	2018
	Imazalil	0.875	Lemon	Spain	2018
	Imazalil	0.148	Lemon	Turkey	2018
	Imazalil	2.023	Lemon	Argentina	2018
	Imazalil	0.089	Lemon	Turkey	2018
	Imazalil	2.119	Lemon	Greece	2018
	Imazalil	0.501	Lemon	Turkey	2018
	Imazalil	0.459	Lemon	Turkey	2018
	Imazalil	0.239	Lemon	Turkey	2018
	Imazalil	1.915	Lemon	Turkey	2018
	Imazalil	0.122	Lemon	Turkey	2018
	Imazalil	2.554	Lemon	Turkey	2018
	Imazalil	2.238	Lemon	Turkey	2018
	Imazalil	0.677	Lemon	Turkey	2018
	Imazalil	3.106	Lemon	Argentina	2018
	Imazalil	1.88	Lemon	South Africa	2018
	Imazalil	0.79	Lemon	South Africa	2018
	Imazalil	3.261	Lemon	Argentina	2018
	Imazalil	1.879	Lemon	Argentina	2018
	Imazalil	0.831	Lemon	South Africa	2018
	Imazalil	0.566	Lemon	South Africa	2018
	Imazalil	3.261	Lemon	Argentina	2018
	Imazalil	2.34	Lemon	Argentina	2018
	Imazalil	0.305	Raspberry	Morocco	2018
	Imazalil	0.716	Mandarin	Turkey	2018
	Imazalil	1.491	Mandarin	Croatia	2018
	Imazalil	0.412	Mandarin	Greece	2018
	Imazalil	1.104	Mandarin	Greece	2018
	Imazalil	1.065	Mandarin	Turkey	2018
	Imazalil	1.191	Mandarin	Turkey	2018
	Imazalil	1.416	Mandarin	Croatia	2018
	Imazalil	0.063	Mandarin	Turkey	2018
	Imazalil	0.075	Mandarin	Turkey	2018
	Imazalil	1.257	Mandarin	Croatia	2018
	Imazalil	0.165	Mandarin	Turkey	2018
	Imazalil	1.096	Mandarin	Greece	2018
	Imazalil	1.267	Mandarin	Greece	2018
	Imazalil	0.174	Mandarin	Turkey	2018
	Imazalil	0.39	Mandarin	Turkey	2018
	Imazalil	1.357	Mandarin	Turkey	2018
	Imazalil	0.837	Mandarin	Greece	2018
	Imazalil	0.154	Mandarin	Turkey	2018
	Imazalil	0.483	Mandarin	Spain	2018
	Imazalil	1.9	Mandarin	Turkey	2018
	Imazalil	1.943	Mandarin	Turkey	2018
	Imazalil	1.999	Mandarin	Egypt	2018
	Imazalil	0.065	Mandarin	Croatia	2018
	Imazalil	0.476	Mandarin	Turkey	2018
	Imazalil	2.35	Mandarin	Morocco	2018
	Imazalil	0.986	Mandarin	Cyprus	2018
	Imazalil	0.391	Mandarin	Cyprus	2018
	Imazalil	1.296	Mandarin	Croatia	2018
	Imazalil	0.034	Pomegranate	Turkey	2018
	Imazalil	0.01	Pomegranate	Turkey	2018
	Imazalil	0.038	Pomegranate	Turkey	2018
	Imazalil	0.031	Pomegranate	Turkey	2018
	Imazalil	0.01	Pomegranate	Turkey	2018
	Imazalil	0.027	Pomegranate	Turkey	2018
	Imazalil	0.05	Pomegranate	Turkey	2018
	Imazalil	0.141	Pomelo	China	2018
	Imazalil	2.753	Pomelo	China	2018
	Imazalil	0.036	Pomelo	China	2018
	Imazalil	1.137	Orange	Turkey	2018
	Imazalil	3.834	Orange	South Africa	2018
	Imazalil	1.117	Orange	South Africa	2018
	Imazalil	2.731	Orange	Egypt	2018
	Imazalil	0.683	Orange	Egypt	2018
	Imazalil	1.087	Orange	Egypt	2018
	Imazalil	0.053	Orange	Greece	2018
	Imazalil	1.514	Orange	Greece	2018
	Imazalil	1.176	Orange	Greece	2018
	Imazalil	0.265	Orange	Zimbabwe	2018
	Imazalil	0.545	Orange	Greece	2018
	Imazalil	0.154	Orange	Zimbabwe	2018
	Imazalil	1.321	Orange	South Africa	2018
	Imazalil	0.652	Orange	South Africa	2018
	Imazalil	0.224	Orange	Spain	2018
	Imazalil	3.257	Orange	Spain	2018
	Imazalil	3.095	Orange	South Africa	2018
	Imazalil	1.27	Orange	The Netherlands	2018
	Imazalil	1.225	Orange	South Africa	2018
	Imazalil	0.152	Orange	Turkey	2018
	Imazalil	1.329	Orange	Greece	2018
	Imazalil	0.618	Orange	Greece	2018
	Imazalil	0.849	Orange	Greece	2018
	Imazalil	0.294	Orange	Greece	2018
	Imazalil	0.532	Orange	Greece	2018
	Imazalil	3.596	Orange	South Africa	2018
	Imazalil	0.852	Orange	South Africa	2018
	Imazalil	0.237	Orange	Greece	2018
	Imazalil	2.14	Orange	Greece	2018
	Imazalil	0.535	Orange	Greece	2018
	Imazalil	0.518	Orange	Spain	2018
	Imazalil	0.324	Orange	Turkey	2018
	Imazalil	0.3	Orange	Turkey	2018
	Imazalil	3.427	Orange	Spain	2018
	Imazalil	3.623	Orange	Turkey	2018
	Imazalil	0.434	Orange	Egypt	2018
	Imazalil	0.528	Orange	Spain	2018
	Imazalil	0.622	Orange	Turkey	2018
	Imazalil	0.72	Orange	Turkey	2018
	Imazalil	0.48	Orange	Greece	2018
	Imazalil	0.095	Orange	Turkey	2018
	Imazalil	0.876	Orange	Turkey	2018
	Imazalil	0.25	Orange	Turkey	2018
	Imazalil	0.301	Orange	Turkey	2018
	Imazalil	0.689	Orange	Egypt	2018
	Imazalil	3.01	Orange	Spain	2018
	Imazalil	0.122	Orange	Turkey	2018
	Imazalil	1.951	Orange	Spain	2018
	Imazalil	1.317	Orange	Spain	2018
	Imazalil	0.772	Orange	Egypt	2018
	Imazalil	3.972	Orange	Morocco	2018
	Imazalil	0.785	Orange	Egypt	2018
	Imazalil	3.423	Orange	Egypt	2018
	Imazalil	1.094	Orange	Egypt	2018
	Imazalil	0.172	Orange	Zimbabwe	2018
	Imazalil	1.1	Orange	South Africa	2018
	Imazalil	1.3	Orange	South Africa	2018
	Imazalil	2.071	Orange	South Africa	2018
	Imazalil	1.684	Orange	South Africa	2018
	Imazalil	1.506	Orange	South Africa	2018
	Imazalil	0.441	Orange	South Africa	2018
	Imazalil	4.183	Orange	South Africa	2018
	Imazalil	0.808	Orange	Zimbabwe	2018
	Imazalil	2.658	Orange	South Africa	2018
	Imazalil	0.256	Orange	Turkey	2018
	Imazalil	0.092	Orange	Turkey	2018
	Imazalil	1.051	Orange	South Africa	2018
	Imazalil	0.013	Date palm	Iran	2018
	Imidacloprid	0.026	Peach	Serbia	2018
	Imidacloprid	0.061	Peach	Greece	2018
	Imidacloprid	0.059	Grapefruit	Greece	2018
	Imidacloprid	0.013	Grapefruit	South Africa	2018
	Imidacloprid	0.058	Grapefruit	South Africa	2018
	Imidacloprid	0.064	Grapefruit	Turkey	2018
	Imidacloprid	0.07	Grapefruit	Turkey	2018
	Imidacloprid	0.015	Grapefruit	Turkey	2018
	Imidacloprid	0.012	Grapefruit	Turkey	2018
	Imidacloprid	0.012	Grapefruit	Turkey	2018
	Imidacloprid	0.013	Grapefruit	Turkey	2018
	Imidacloprid	0.023	Grapefruit	Turkey	2018
	Imidacloprid	0.011	Grapefruit	South Africa	2018
	Imidacloprid	0.027	Grapefruit	South Africa	2018
	Imidacloprid	0.032	Grapefruit	Turkey	2018
	Imidacloprid	0.012	Grapefruit	South Africa	2018
	Imidacloprid	0.104	Grapefruit	Turkey	2018
	Imidacloprid	0.02	Grapefruit	Turkey	2018
	Imidacloprid	0.018	Grapefruit	Turkey	2018
	Imidacloprid	0.014	Grapes	Greece	2018
	Imidacloprid	0.01	Apple	Serbia	2018
	Imidacloprid	0.01	Apple	Serbia	2018
	Imidacloprid	0.029	Apple	Serbia	2018
	Imidacloprid	0.069	Apple	Serbia	2018
	Imidacloprid	0.026	Apple	Poland	2018
	Imidacloprid	0.033	Apple	North Macedonia	2018
	Imidacloprid	0.026	Apple	Bosnia and Herzegovina	2018
	Imidacloprid	0.011	Apple	Poland	2018
	Imidacloprid	0.019	Pear	Serbia	2018
	Imidacloprid	0.01	Lime	Guatemala	2018
	Imidacloprid	0.011	Lemon	South Africa	2018
	Imidacloprid	0.032	Lemon	South Africa	2018
	Imidacloprid	0.01	Lemon	Turkey	2018
	Imidacloprid	0.086	Lemon	South Africa	2018
	Imidacloprid	0.01	Mandarin	Swaziland	2018
	Imidacloprid	0.01	Mandarin	Croatia	2018
	Imidacloprid	0.011	Mandarin	Croatia	2018
	Imidacloprid	0.02	Mandarin	Turkey	2018
	Imidacloprid	0.012	Mandarin	Egypt	2018
	Imidacloprid	0.037	Pomegranate	Turkey	2018
	Imidacloprid	0.066	Pomegranate	Turkey	2018
	Imidacloprid	0.013	Peach (nectarine)	Serbia	2018
	Imidacloprid	0.01	Orange	Egypt	2018
	Imidacloprid	0.011	Orange	Greece	2018
	Imidacloprid	0.018	Orange	South Africa	2018
	Imidacloprid	0.011	Orange	South Africa	2018
	Imidacloprid	0.01	Orange	Egypt	2018
	Imidacloprid	0.124	Orange	South Africa	2018
	Imidacloprid	0.017	Sweet cherry	North Macedonia	2018
	Imidacloprid	0.024	Sweet cherry	Serbia	2018
	Indoxacarb	0.015	Grapefruit	Turkey	2018
	Indoxacarb	0.013	Apple	Poland	2018
	Indoxacarb	0.016	Apple	Poland	2018
	Indoxacarb	0.011	Pear	South Africa	2018
	Indoxacarb	0.015	Kumquat	Italy	2018
	Indoxacarb	0.01	Lemon	Argentina	2018
	Indoxacarb	0.038	Pomegranate	Turkey	2018
	Indoxacarb	0.02	Pomegranate	Turkey	2018
	Indoxacarb	0.08	Pomegranate	Turkey	2018
	Indoxacarb	0.053	Pomegranate	Turkey	2018
	Indoxacarb	0.032	Pomegranate	Turkey	2018
	Iprovalicarb	0.011	Grapefruit	Turkey	2018
	Iprovalicarb	0.05	Grapes	Italy	2018
	Isoprocarb	0.01	Grapefruit	Turkey	2018
	Isoproturon	0.01	Lime	Guatemala	2018
	Ketoconazole	0.01	Mandarin	Greece	2018
	Ketoconazole	0.01	Mandarin	Cyprus	2018
	Ketoconazole	0.01	Pomegranate	Turkey	2018
	Ketoconazole	0.01	Orange	Egypt	2018
	Ketoconazole	0.01	Orange	Egypt	2018
	Ketoconazole	0.01	Orange	Greece	2018
	Ketoconazole	0.01	Orange	Greece	2018
	Ketoconazole	0.01	Orange	Greece	2018
	Ketoconazole	0.01	Orange	South Africa	2018
	Ketoconazole	0.01	Orange	South Africa	2018
	Ketoconazole	0.01	Orange	Turkey	2018
	Ketoconazole	0.01	Orange	Greece	2018
	Ketoconazole	0.01	Orange	Greece	2018
	Ketoconazole	0.01	Orange	South Africa	2018
	Ketoconazole	0.01	Orange	South Africa	2018
	Ketoconazole	0.01	Orange	Morocco	2018
	Ketoconazole	0.01	Orange	Egypt	2018
	Ketoconazole	0.01	Orange	Zimbabwe	2018
	Ketoconazole	0.01	Orange	Turkey	2018
	Kresoxim-methyl	0.016	Grapefruit	Turkey	2018
	Kresoxim-methyl	0.013	Grapefruit	Turkey	2018
	Lambda-cyhalothrin	0.02	Pomegranate	Turkey	2018
	Lufenuron	0.051	Grapefruit	Turkey	2018
	Lufenuron	0.051	Pomegranate	Turkey	2018
	Malathion	0.011	Grapefruit	Turkey	2018
	Malathion	0.016	Grapefruit	Turkey	2018
	Malathion	0.15	Grapefruit	Turkey	2018
	Malathion	0.013	Grapefruit	Turkey	2018
	Malathion	0.133	Grapefruit	Turkey	2018
	Malathion	0.027	Lemon	Turkey	2018
	Malathion	0.01	Mandarin	Turkey	2018
	Malathion	0.013	Pomegranate	Turkey	2018
	Malathion	0.02	Pomegranate	Turkey	2018
	Mandipropamid	0.038	Grapes	Italy	2018
	Mandipropamid	0.195	Grapes	Greece	2018
	Mandipropamid	0.655	Grapes	Italy	2018
	Mepanipyrim	0.01	Peach	France	2018
	Mepanipyrim	0.04	Grapefruit	Turkey	2018
	Mepanipyrim	0.034	Grapefruit	Turkey	2018
	Mepanipyrim	0.01	Grapefruit	South Africa	2018
	Mepanipyrim	0.035	Grapefruit	Turkey	2018
	Mepanipyrim	0.071	Mandarin	Turkey	2018
	Mepanipyrim	0.08	Pomegranate	Turkey	2018
	Mepanipyrim	0.094	Pomegranate	Turkey	2018
	Mepanipyrim	0.103	Pomegranate	Turkey	2018
	Mepanipyrim	0.077	Pomegranate	Turkey	2018
	Mepanipyrim	0.01	Orange	South Africa	2018
	Mepanipyrim	0.01	Orange	South Africa	2018
	Metalaxyl	0.254	Grapes	North Macedonia	2018
	Metalaxyl	0.177	Grapes	North Macedonia	2018
	Metalaxyl	0.015	Grapes	Italy	2018
	Metalaxyl	0.012	Grapes	North Macedonia	2018
	Metalaxyl	0.17	Grapes	North Macedonia	2018
	Metalaxyl	0.023	Grapes	Greece	2018
	Metalaxyl	0.58	Grapes	North Macedonia	2018
	Metalaxyl	0.128	Grapes	North Macedonia	2018
	Metalaxyl	0.127	Lemon	Turkey	2018
	Metalaxyl	0.017	Orange	Greece	2018
	Methabenzthiazuron	0.01	Grapefruit	Turkey	2018
	Methabenzthiazuron	0.01	Pomegranate	Turkey	2018
	Methabenzthiazuron	0.01	Pomegranate	Turkey	2018
	Methabenzthiazuron	0.01	Pomegranate	Turkey	2018
	Methabenzthiazuron	0.01	Pomegranate	Turkey	2018
	Methamidophos	0.689	Grapefruit	Turkey	2018
	Methamidophos	0.452	Grapefruit	Turkey	2018
	Methamidophos	0.01	Grapefruit	South Africa	2018
	Methamidophos	0.536	Mandarin	Turkey	2018
	Methamidophos	0.023	Pomegranate	Turkey	2018
	Methamidophos	0.183	Pomegranate	Turkey	2018
	Methamidophos	0.01	Pomegranate	Turkey	2018
	Methamidophos	0.481	Pomegranate	Turkey	2018
	Methamidophos	0.02	Pomegranate	Turkey	2018
	Methamidophos	0.619	Pomegranate	Turkey	2018
	Methamidophos	2.048	Pomegranate	Turkey	2018
	Methamidophos	0.01	Pomegranate	Argentina	2018
	Methamidophos	0.474	Pomegranate	Turkey	2018
	Methamidophos	0.028	Pomegranate	Turkey	2018
	Methamidophos	0.018	Pomegranate	Turkey	2018
	Methamidophos	0.01	Orange	South Africa	2018
	Methamidophos	0.01	Orange	South Africa	2018
	Methidathion	0.012	Orange	South Africa	2018
	Methiocarb	0.029	Banana	Costa Rica	2018
	Methiocarb	0.011	Banana	Costa Rica	2018
	Methiocarb	0.01	Grapefruit	South Africa	2018
	Methiocarb	0.019	Apple	Italy	2018
	Methiocarb	0.018	Kiwi	Italy	2018
	Methiocarb	0.06	Kiwi	Italy	2018
	Methiocarb	0.013	Lemon	Turkey	2018
	Methiocarb	0.01	Lemon	Turkey	2018
	Methiocarb	0.176	Lemon	Turkey	2018
	Methiocarb	0.01	Mandarin	Turkey	2018
	Methiocarb	0.01	Orange	Turkey	2018
	Methomyl	0.02	Ananas	Colombia	2018
	Methomyl	0.02	Banana	Guatemala	2018
	Methomyl	0.593	Grapefruit	Turkey	2018
	Methomyl	0.159	Grapefruit	Turkey	2018
	Methomyl	0.172	Grapefruit	Turkey	2018
	Methomyl	0.02	Apple	Poland	2018
	Methomyl	0.02	Apple	Poland	2018
	Methomyl	0.02	Apple	Slovenia	2018
	Methomyl	0.02	Strawberry	Albania	2018
	Methomyl	0.01	Lemon	Turkey	2018
	Methomyl	0.01	Mandarin	Croatia	2018
	Methomyl	0.01	Mandarin	Croatia	2018
	Methomyl	0.015	Mandarin	Greece	2018
	Methomyl	0.015	Mandarin	Turkey	2018
	Methomyl	0.01	Pomegranate	Turkey	2018
	Methomyl	0.016	Orange	Greece	2018
	Methomyl	0.018	Orange	Greece	2018
	Methomyl	0.016	Orange	Turkey	2018
	Methomyl	0.018	Orange	Turkey	2018
	Methoxyfenozide	0.012	Banana	Colombia	2018
	Methoxyfenozide	0.026	Grapefruit	South Africa	2018
	Methoxyfenozide	0.011	Grapefruit	Swaziland	2018
	Methoxyfenozide	0.998	Grapefruit	Turkey	2018
	Methoxyfenozide	1.129	Grapefruit	Turkey	2018
	Methoxyfenozide	0.01	Grapefruit	South Africa	2018
	Methoxyfenozide	1.042	Grapefruit	Turkey	2018
	Methoxyfenozide	0.012	Grapefruit	Turkey	2018
	Methoxyfenozide	0.011	Grapefruit	Turkey	2018
	Methoxyfenozide	0.088	Grapes	Italy	2018
	Methoxyfenozide	0.804	Grapes	Greece	2018
	Methoxyfenozide	0.078	Grapes	Italy	2018
	Methoxyfenozide	0.012	Apple	Poland	2018
	Methoxyfenozide	0.012	Apple	Poland	2018
	Methoxyfenozide	0.028	Apple	Croatia	2018
	Methoxyfenozide	0.017	Apple	Croatia	2018
	Methoxyfenozide	0.012	Apple	Italy	2018
	Methoxyfenozide	0.015	Apple	Poland	2018
	Methoxyfenozide	0.011	Apple	Poland	2018
	Methoxyfenozide	0.015	Apple	Croatia	2018
	Methoxyfenozide	0.019	Lime	Mexico	2018
	Methoxyfenozide	0.01	Mandarin	Croatia	2018
	Methoxyfenozide	0.027	Mandarin	Turkey	2018
	Methoxyfenozide	0.016	Mandarin	Greece	2018
	Methoxyfenozide	0.026	Pomegranate	Turkey	2018
	Methoxyfenozide	0.013	Pomegranate	Turkey	2018
	Methoxyfenozide	0.018	Pomegranate	Turkey	2018
	Methoxyfenozide	0.019	Pomegranate	Turkey	2018
	Methoxyfenozide	0.034	Pomegranate	Turkey	2018
	Methoxyfenozide	0.019	Pomegranate	Turkey	2018
	Methoxyfenozide	0.018	Pomegranate	Turkey	2018
	Methoxyfenozide	0.039	Pomegranate	Turkey	2018
	Methoxyfenozide	0.013	Pomegranate	Turkey	2018
	Methoxyfenozide	0.045	Orange	Turkey	2018
	Methoxyfenozide	0.026	Orange	South Africa	2018
	Methoxyfenozide	0.025	Orange	Zimbabwe	2018
	Methoxyfenozide	0.014	Orange	South Africa	2018
	Methoxyfenozide	0.016	Orange	Greece	2018
	Methoxyfenozide	0.017	Orange	Zimbabwe	2018
	Methoxyfenozide	0.012	Orange	South Africa	2018
	Methoxyfenozide	0.067	Orange	South Africa	2018
	Methoxyfenozide	0.108	Orange	South Africa	2018
	Metobromuron	0.598	Grapefruit	Turkey	2018
	Metobromuron	0.559	Grapefruit	Turkey	2018
	Metribuzin	0.025	Grapefruit	Greece	2018
	Metribuzin	0.335	Grapefruit	Turkey	2018
	Metribuzin	0.303	Grapefruit	Turkey	2018
	Metribuzin	0.013	Apple	Serbia	2018
	Metribuzin	0.01	Apple	Croatia	2018
	Metribuzin	0.032	Clementine	Spain	2018
	Metribuzin	0.019	Lemon	Greece	2018
	Metribuzin	0.012	Lemon	Turkey	2018
	Metribuzin	0.015	Lemon	Turkey	2018
	Metribuzin	0.012	Lemon	Spain	2018
	Metribuzin	0.012	Lemon	Argentina	2018
	Metribuzin	0.014	Lemon	Argentina	2018
	Metribuzin	0.013	Mandarin	Greece	2018
	Metribuzin	0.024	Mandarin	Greece	2018
	Metribuzin	0.021	Mandarin	Greece	2018
	Metribuzin	0.031	Mandarin	Cyprus	2018
	Metribuzin	0.011	Orange	Egypt	2018
	Metribuzin	0.048	Orange	Greece	2018
	Metribuzin	0.025	Orange	Greece	2018
	Metribuzin	0.012	Orange	Zimbabwe	2018
	Metribuzin	0.021	Orange	Greece	2018
	Metribuzin	0.019	Orange	Greece	2018
	Metribuzin	0.012	Orange	Turkey	2018
	Metribuzin	0.018	Orange	Egypt	2018
	Metribuzin	0.01	Orange	Turkey	2018
	Metribuzin	0.014	Orange	Turkey	2018
	Metribuzin	0.017	Orange	Morocco	2018
	Metribuzin	0.01	Orange	Egypt	2018
	Metribuzin	0.011	Orange	South Africa	2018
	Metribuzin	0.01	Orange	Zimbabwe	2018
	Metribuzin	0.013	Orange	South Africa	2018
	Metribuzin	0.012	Plum	Serbia	2018
	Monocrotophos	0.01	Pomegranate	Turkey	2018
	Monocrotophos	0.01	Pomegranate	Turkey	2018
	Monocrotophos	0.01	Pomegranate	Turkey	2018
	Myclobutanil	0.283	Banana	Italy	2018
	Myclobutanil	0.265	Banana	Costa Rica	2018
	Myclobutanil	0.255	Banana	Costa Rica	2018
	Myclobutanil	0.29	Banana	Costa Rica	2018
	Myclobutanil	0.175	Banana	Costa Rica	2018
	Myclobutanil	0.061	Banana	Colombia	2018
	Myclobutanil	0.074	Banana	Costa Rica	2018
	Myclobutanil	0.012	Banana	Colombia	2018
	Myclobutanil	0.136	Banana	Colombia	2018
	Myclobutanil	0.119	Banana	Ecuador	2018
	Myclobutanil	0.107	Banana	Costa Rica	2018
	Myclobutanil	0.064	Banana	Ecuador	2018
	Myclobutanil	0.096	Grapes	Greece	2018
	Myclobutanil	0.015	Peach	Greece	2018
	Myclobutanil	0.027	Pomelo	China	2018
	Myclobutanil	0.02	Strawberry	Albania	2018
	Novaluron	0.01	Ananas	Colombia	2018
	Nuarimol	0.043	Grapefruit	Turkey	2018
	Nuarimol	0.032	Mandarin	Turkey	2018
	Omethoate	0.01	Apple	Bosnia and Herzegovina	2018
	Omethoate	0.01	Orange	Egypt	2018
	Omethoate	0.01	Sweet cherry	North Macedonia	2018
	Omethoate	0.06	Sour cherry	Serbia	2018
	Oxadixyl	0.01	Grapefruit	South Africa	2018
	Oxadixyl	0.01	Grapefruit	South Africa	2018
	Oxadixyl	0.042	Grapefruit	Turkey	2018
	Oxadixyl	0.032	Grapefruit	Turkey	2018
	Oxadixyl	0.595	Grapefruit	Turkey	2018
	Oxadixyl	0.01	Grapefruit	South Africa	2018
	Oxadixyl	0.022	Grapefruit	Turkey	2018
	Oxadixyl	0.01	Grapefruit	Turkey	2018
	Oxadixyl	0.418	Mandarin	Turkey	2018
	Oxadixyl	0.032	Pomegranate	Turkey	2018
	Oxamyl	0.354	Grapefruit	Turkey	2018
	Oxamyl	1.821	Lime	Guatemala	2018
	Oxamyl	0.307	Mandarin	Turkey	2018
	Oxamyl	0.119	Pomegranate	Turkey	2018
	Oxamyl	0.12	Pomegranate	Turkey	2018
	Oxamyl	0.114	Pomegranate	Turkey	2018
	Oxamyl	0.098	Pomegranate	Turkey	2018
	Penconazole	0.03	Grapefruit	Turkey	2018
	Penconazole	0.021	Grapefruit	Turkey	2018
	Penconazole	0.024	Grapefruit	Turkey	2018
	Penconazole	0.175	Grapes	Italy	2018
	Penconazole	0.112	Grapes	Greece	2018
	Penconazole	0.022	Grapes	Italy	2018
	Penconazole	0.081	Strawberry	Greece	2018
	Penconazole	0.039	Strawberry	Albania	2018
	Phenmedipham	0.01	Grapes	North Macedonia	2018
	Picoxystrobin	0.01	Grapefruit	South Africa	2018
	Picoxystrobin	1.611	Grapefruit	Turkey	2018
	Picoxystrobin	2.144	Grapefruit	Turkey	2018
	Picoxystrobin	0.163	Grapefruit	Turkey	2018
	Picoxystrobin	0.308	Grapefruit	Turkey	2018
	Picoxystrobin	0.184	Grapefruit	Turkey	2018
	Picoxystrobin	0.119	Grapefruit	Turkey	2018
	Picoxystrobin	0.267	Grapefruit	Turkey	2018
	Picoxystrobin	2.439	Grapefruit	Turkey	2018
	Picoxystrobin	0.01	Grapefruit	South Africa	2018
	Picoxystrobin	0.013	Grapefruit	Turkey	2018
	Picoxystrobin	0.084	Grapefruit	South Africa	2018
	Picoxystrobin	0.156	Grapefruit	Turkey	2018
	Picoxystrobin	0.061	Grapefruit	South Africa	2018
	Picoxystrobin	0.01	Grapefruit	South Africa	2018
	Picoxystrobin	0.123	Grapefruit	Turkey	2018
	Picoxystrobin	0.222	Grapefruit	Turkey	2018
	Picoxystrobin	0.108	Grapefruit	Turkey	2018
	Picoxystrobin	0.101	Grapefruit	Turkey	2018
	Picoxystrobin	0.203	Grapefruit	Turkey	2018
	Picoxystrobin	0.012	Apple	Poland	2018
	Picoxystrobin	0.013	Strawberry	Greece	2018
	Picoxystrobin	0.01	Lime	Mexico	2018
	Picoxystrobin	0.011	Lemon	Turkey	2018
	Picoxystrobin	0.01	Lemon	South Africa	2018
	Picoxystrobin	0.133	Mandarin	Turkey	2018
	Picoxystrobin	0.053	Pomegranate	Turkey	2018
	Picoxystrobin	0.267	Pomegranate	Turkey	2018
	Picoxystrobin	0.01	Orange	South Africa	2018
	Picoxystrobin	0.01	Orange	Greece	2018
	Picoxystrobin	0.01	Orange	South Africa	2018
	Picoxystrobin	0.01	Orange	Turkey	2018
	Piperonyl-butoxide	0.13	Ananas	Costa Rica	2018
	Pirimicarb	0.01	Banana	Colombia	2018
	Pirimicarb	0.023	Peach	Serbia	2018
	Pirimicarb	0.015	Grapefruit	South Africa	2018
	Pirimicarb	0.014	Apple	Serbia	2018
	Pirimicarb	0.013	Apple	Poland	2018
	Pirimicarb	0.017	Apple	Austria	2018
	Pirimicarb	0.01	Kiwi	Chile	2018
	Pirimicarb	0.06	Pear	Italy	2018
	Pirimicarb	0.014	Lime	Mexico	2018
	Pirimicarb	0.044	Lemon	Turkey	2018
	Pirimicarb	0.061	Lemon	Turkey	2018
	Pirimicarb	0.031	Lemon	Argentina	2018
	Pirimicarb	0.014	Lemon	South Africa	2018
	Pirimicarb	0.016	Lemon	Argentina	2018
	Pirimicarb	0.01	Mandarin	Greece	2018
	Pirimicarb	0.01	Mandarin	Croatia	2018
	Pirimicarb	0.01	Pomegranate	Turkey	2018
	Pirimiphos-methyl	0.023	Grapefruit	Turkey	2018
	Pirimiphos-methyl	0.025	Grapefruit	Turkey	2018
	Pirimiphos-methyl	0.027	Grapefruit	Turkey	2018
	Pirimiphos-methyl	0.48	Mandarin	Swaziland	2018
	Pirimiphos-methyl	0.032	Mandarin	Turkey	2018
	Pirimiphos-methyl	0.046	Pomegranate	Turkey	2018
	Pirimiphos-methyl	0.04	Pomegranate	Turkey	2018
	Pirimiphos-methyl	0.043	Pomegranate	Turkey	2018
	Pirimiphos-methyl	0.037	Pomegranate	Turkey	2018
	Pirimiphos-methyl	0.038	Pomegranate	Turkey	2018
	Prochloraz	0.468	Ananas	Colombia	2018
	Prochloraz	0.332	Ananas	Colombia	2018
	Prochloraz	0.321	Ananas	Colombia	2018
	Prochloraz	0.046	Grapefruit	Turkey	2018
	Prochloraz	0.272	Grapefruit	Turkey	2018
	Prochloraz	0.012	Grapefruit	Turkey	2018
	Prochloraz	0.011	Grapefruit	Turkey	2018
	Prochloraz	0.11	Grapefruit	Turkey	2018
	Prochloraz	0.392	Grapefruit	Turkey	2018
	Prochloraz	0.044	Lime	Guatemala	2018
	Prochloraz	0.018	Lime	Guatemala	2018
	Prochloraz	0.887	Lemon	Turkey	2018
	Prochloraz	1.486	Lemon	Turkey	2018
	Prochloraz	0.523	Lemon	Turkey	2018
	Prochloraz	0.112	Lemon	Turkey	2018
	Prochloraz	0.178	Lemon	Turkey	2018
	Prochloraz	1.755	Lemon	Turkey	2018
	Prochloraz	0.038	Lemon	Turkey	2018
	Prochloraz	0.371	Lemon	Turkey	2018
	Prochloraz	0.327	Lemon	Turkey	2018
	Prochloraz	0.46	Lemon	Turkey	2018
	Prochloraz	0.786	Lemon	Turkey	2018
	Prochloraz	3.263	Lemon	Turkey	2018
	Prochloraz	2.906	Lemon	Turkey	2018
	Prochloraz	0.013	Mandarin	Swaziland	2018
	Prochloraz	0.027	Mandarin	Turkey	2018
	Prochloraz	0.351	Mandarin	Turkey	2018
	Prochloraz	0.03	Mandarin	Turkey	2018
	Prochloraz	0.165	Mandarin	Turkey	2018
	Prochloraz	0.029	Mandarin	Turkey	2018
	Prochloraz	0.568	Mandarin	Turkey	2018
	Prochloraz	0.273	Mandarin	Turkey	2018
	Prochloraz	0.136	Mandarin	Turkey	2018
	Prochloraz	0.464	Mandarin	Turkey	2018
	Prochloraz	0.952	Mandarin	Turkey	2018
	Prochloraz	1.874	Mandarin	Turkey	2018
	Prochloraz	0.051	Mandarin	Greece	2018
	Prochloraz	0.02	Pomegranate	Turkey	2018
	Prochloraz	0.029	Pomelo	China	2018
	Prochloraz	0.044	Orange	South Africa	2018
	Prochloraz	1.079	Orange	Turkey	2018
	Prochloraz	0.676	Orange	Turkey	2018
	Prochloraz	0.135	Orange	Turkey	2018
	Prochloraz	2.075	Orange	Turkey	2018
	Prochloraz	0.012	Orange	Turkey	2018
	Prochloraz	0.025	Orange	Turkey	2018
	Prochloraz	0.099	Sour cherry	Serbia	2018
	Promecarb	0.024	Grapefruit	Turkey	2018
	Promecarb	0.03	Grapefruit	Turkey	2018
	Promecarb	0.031	Mandarin	Turkey	2018
	Promecarb	0.01	Pomegranate	Turkey	2018
	Promecarb	0.038	Pomegranate	Turkey	2018
	Promecarb	0.039	Pomegranate	Turkey	2018
	Promecarb	0.01	Pomegranate	Turkey	2018
	Prometon	0.01	Banana	Guatemala	2018
	Prometon	0.01	Banana	Colombia	2018
	Prometon	0.01	Apple	Serbia	2018
	Prometon	0.01	Plum	Italy	2018
	Prometryn	0.048	Grapefruit	Turkey	2018
	Prometryn	0.062	Grapefruit	Turkey	2018
	Prometryn	0.106	Grapefruit	Turkey	2018
	Prometryn	0.01	Grapes	North Macedonia	2018
	Propargite	0.316	Grapefruit	Turkey	2018
	Propham	0.032	Ananas	Colombia	2018
	Propham	0.02	Banana	Guatemala	2018
	Propham	0.05	Banana	Colombia	2018
	Propham	0.01	Banana	Mexico	2018
	Propham	0.01	Peach	Spain	2018
	Propham	0.01	Grapefruit	Turkey	2018
	Propham	0.01	Grapefruit	South Africa	2018
	Propham	0.01	Grapefruit	South Africa	2018
	Propham	0.01	Grapefruit	Turkey	2018
	Propham	0.045	Apple	Poland	2018
	Propham	0.025	Apple	Poland	2018
	Propham	0.025	Apple	Poland	2018
	Propham	0.015	Apple	Poland	2018
	Propham	0.025	Apple	Italy	2018
	Propham	0.017	Apple	Slovenia	2018
	Propham	0.033	Apple	Poland	2018
	Propham	0.05	Strawberry	Albania	2018
	Propham	0.01	Pear	Serbia	2018
	Propham	0.031	Lime	Mexico	2018
	Propham	0.052	Lime	Guatemala	2018
	Propham	0.01	Lemon	Turkey	2018
	Propham	0.01	Lemon	Turkey	2018
	Propham	0.01	Lemon	Argentina	2018
	Propham	0.01	Mandarin	Swaziland	2018
	Propham	0.01	Mandarin	Turkey	2018
	Propham	0.019	Mandarin	Turkey	2018
	Propham	0.01	Mandarin	Cyprus	2018
	Propham	0.085	Pomegranate	Turkey	2018
	Propham	0.024	Pomegranate	Turkey	2018
	Propham	0.01	Peach (nectarine)	Serbia	2018
	Propham	0.01	Peach (nectarine)	Spain	2018
	Propham	0.01	Orange	Greece	2018
	Propham	0.027	Orange	Greece	2018
	Propham	0.02	Orange	Turkey	2018
	Propham	0.01	Orange	Spain	2018
	Propiconazole	0.235	Grapefruit	Turkey	2018
	Propiconazole	0.023	Grapefruit	Turkey	2018
	Propiconazole	0.027	Grapes	Greece	2018
	Propiconazole	0.021	Lime	Mexico	2018
	Propiconazole	1.406	Lemon	South Africa	2018
	Propiconazole	0.398	Lemon	South Africa	2018
	Propiconazole	0.903	Lemon	Argentina	2018
	Propiconazole	0.59	Lemon	Argentina	2018
	Propiconazole	0.464	Lemon	Argentina	2018
	Propiconazole	0.025	Lemon	Spain	2018
	Propiconazole	0.688	Lemon	Argentina	2018
	Propiconazole	0.522	Lemon	Turkey	2018
	Propiconazole	1.506	Lemon	Argentina	2018
	Propiconazole	0.959	Lemon	Argentina	2018
	Propiconazole	0.475	Lemon	Argentina	2018
	Propiconazole	0.026	Lemon	South Africa	2018
	Propiconazole	2.28	Lemon	South Africa	2018
	Propiconazole	2.036	Lemon	Argentina	2018
	Propiconazole	0.259	Lemon	Argentina	2018
	Propiconazole	0.032	Mandarin	Turkey	2018
	Propiconazole	0.051	Mandarin	Spain	2018
	Propiconazole	0.158	Mandarin	Turkey	2018
	Propiconazole	0.359	Mandarin	Turkey	2018
	Propiconazole	0.402	Mandarin	Morocco	2018
	Propiconazole	0.032	Pomegranate	Turkey	2018
	Propiconazole	0.01	Pomegranate	Turkey	2018
	Propiconazole	0.01	Pomegranate	Turkey	2018
	Propiconazole	0.01	Pomegranate	Turkey	2018
	Propiconazole	0.025	Pomegranate	Turkey	2018
	Propiconazole	0.01	Pomegranate	Turkey	2018
	Propiconazole	0.026	Pomegranate	Turkey	2018
	Propiconazole	0.014	Pomelo	China	2018
	Propiconazole	0.895	Orange	South Africa	2018
	Propiconazole	1.928	Orange	Spain	2018
	Propiconazole	2.901	Orange	South Africa	2018
	Propiconazole	1.1	Orange	The Netherlands	2018
	Propiconazole	0.934	Orange	Turkey	2018
	Propiconazole	0.13	Orange	Turkey	2018
	Propiconazole	0.873	Orange	Turkey	2018
	Propiconazole	0.013	Orange	Turkey	2018
	Propiconazole	0.58	Orange	Morocco	2018
	Propiconazole	2.291	Orange	South Africa	2018
	Propiconazole	0.115	Orange	Zimbabwe	2018
	Propiconazole	0.021	Orange	South Africa	2018
	Propoxur	0.014	Banana	Costa Rica	2018
	Propoxur	0.011	Grapefruit	Turkey	2018
	Propoxur	0.011	Pear	The Netherlands	2018
	Propoxur	0.021	Lemon	Turkey	2018
	Propoxur	0.127	Mandarin	Turkey	2018
	Propoxur	0.019	Mandarin	Turkey	2018
	Propoxur	0.014	Mandarin	Turkey	2018
	Propoxur	0.031	Pomegranate	Turkey	2018
	Propoxur	0.126	Pomegranate	Turkey	2018
	Propoxur	0.043	Pomegranate	Turkey	2018
	Propoxur	0.084	Pomegranate	Turkey	2018
	Propoxur	0.047	Pomegranate	Turkey	2018
	Propoxur	0.014	Orange	Greece	2018
	Propoxur	0.022	Orange	Greece	2018
	Propoxur	0.016	Orange	Turkey	2018
	Propoxur	0.011	Orange	Turkey	2018
	Prothioconazole	0.01	Banana	Ecuador	2018
	Prothioconazole	0.032	Grapefruit	Turkey	2018
	Prothioconazole	0.01	Grapefruit	Turkey	2018
	Prothioconazole	0.586	Grapefruit	South Africa	2018
	Prothioconazole	0.01	Grapefruit	South Africa	2018
	Prothioconazole	0.02	Grapefruit	Turkey	2018
	Prothioconazole	0.012	Grapefruit	Turkey	2018
	Prothioconazole	0.01	Grapefruit	Turkey	2018
	Prothioconazole	0.01	Grapefruit	South Africa	2018
	Prothioconazole	0.01	Grapefruit	Turkey	2018
	Prothioconazole	0.01	Apple	Serbia	2018
	Prothioconazole	0.011	Apple	Poland	2018
	Prothioconazole	0.011	Apple	Bosnia and Herzegovina	2018
	Prothioconazole	0.01	Clementine	Spain	2018
	Prothioconazole	0.01	Lemon	Turkey	2018
	Prothioconazole	0.02	Lemon	Turkey	2018
	Prothioconazole	0.024	Mandarin	Turkey	2018
	Prothioconazole	0.01	Mandarin	Turkey	2018
	Prothioconazole	0.01	Mandarin	Turkey	2018
	Prothioconazole	0.01	Mandarin	Greece	2018
	Prothioconazole	0.029	Mandarin	Turkey	2018
	Prothioconazole	0.01	Peach (nectarine)	Spain	2018
	Prothioconazole	0.01	Orange	Egypt	2018
	Prothioconazole	0.01	Orange	Greece	2018
	Prothioconazole	0.01	Orange	Greece	2018
	Prothioconazole	0.01	Orange	Greece	2018
	Prothioconazole	0.01	Orange	Greece	2018
	Prothioconazole	0.01	Orange	South Africa	2018
	Prothioconazole	0.01	Orange	Turkey	2018
	Prothioconazole	0.01	Orange	Greece	2018
	Prothioconazole	0.01	Orange	Greece	2018
	Prothioconazole	0.01	Orange	Greece	2018
	Prothioconazole	0.01	Orange	South Africa	2018
	Prothioconazole	0.02	Orange	Turkey	2018
	Prothioconazole	0.01	Orange	Turkey	2018
	Prothioconazole	0.01	Orange	Turkey	2018
	Prothioconazole	0.01	Orange	Turkey	2018
	Prothioconazole	0.01	Orange	Spain	2018
	Prothioconazole	0.01	Orange	Egypt	2018
	Prothioconazole	0.01	Orange	Egypt	2018
	Prothioconazole	0.01	Orange	Egypt	2018
	Prothioconazole	0.01	Orange	South Africa	2018
	Prothioconazole	0.01	Orange	Zimbabwe	2018
	Prothioconazole	0.01	Orange	Turkey	2018
	Prothioconazole	0.015	Orange	Greece	2018
	Prothioconazole	0.015	Orange	Turkey	2018
	Prothioconazole	0.01	Orange	Turkey	2018
	Pyracarbolid	0.014	Grapefruit	Turkey	2018
	Pyracarbolid	0.016	Grapefruit	Turkey	2018
	Pyracarbolid	0.015	Grapefruit	Turkey	2018
	Pyraclostrobin	0.018	Grapefruit	South Africa	2018
	Pyraclostrobin	0.015	Grapefruit	Turkey	2018
	Pyraclostrobin	0.053	Grapefruit	South Africa	2018
	Pyraclostrobin	0.021	Grapefruit	South Africa	2018
	Pyraclostrobin	0.024	Grapefruit	South Africa	2018
	Pyraclostrobin	0.023	Grapefruit	South Africa	2018
	Pyraclostrobin	0.024	Grapefruit	South Africa	2018
	Pyraclostrobin	0.022	Grapefruit	South Africa	2018
	Pyraclostrobin	0.018	Grapes	North Macedonia	2018
	Pyraclostrobin	0.016	Apple	Serbia	2018
	Pyraclostrobin	0.018	Apple	Serbia	2018
	Pyraclostrobin	0.049	Apple	Serbia	2018
	Pyraclostrobin	0.017	Apple	Serbia	2018
	Pyraclostrobin	0.01	Apple	Serbia	2018
	Pyraclostrobin	0.022	Apple	Poland	2018
	Pyraclostrobin	0.035	Apple	Poland	2018
	Pyraclostrobin	0.01	Apple	Croatia	2018
	Pyraclostrobin	0.034	Apple	Poland	2018
	Pyraclostrobin	0.021	Apple	Poland	2018
	Pyraclostrobin	0.01	Apple	Poland	2018
	Pyraclostrobin	0.014	Apple	Croatia	2018
	Pyraclostrobin	0.145	Strawberry	Albania	2018
	Pyraclostrobin	0.031	Strawberry	Serbia	2018
	Pyraclostrobin	0.015	Strawberry	Serbia	2018
	Pyraclostrobin	0.028	Strawberry	Serbia	2018
	Pyraclostrobin	0.064	Strawberry	Albania	2018
	Pyraclostrobin	0.021	Pear	Serbia	2018
	Pyraclostrobin	0.042	Pear	Serbia	2018
	Pyraclostrobin	0.011	Pear	The Netherlands	2018
	Pyraclostrobin	0.014	Pear	Serbia	2018
	Pyraclostrobin	0.011	Pear	Italy	2018
	Pyraclostrobin	0.018	Pear	The Netherlands	2018
	Pyraclostrobin	0.016	Lemon	South Africa	2018
	Pyraclostrobin	0.012	Lemon	South Africa	2018
	Pyraclostrobin	0.019	Lemon	Argentina	2018
	Pyraclostrobin	0.017	Lemon	Argentina	2018
	Pyraclostrobin	0.014	Lemon	Argentina	2018
	Pyraclostrobin	0.014	Lemon	Argentina	2018
	Pyraclostrobin	0.031	Lemon	South Africa	2018
	Pyraclostrobin	0.022	Lemon	South Africa	2018
	Pyraclostrobin	0.013	Lemon	Argentina	2018
	Pyraclostrobin	0.039	Mandarin	Turkey	2018
	Pyraclostrobin	0.046	Orange	Turkey	2018
	Pyraclostrobin	0.052	Orange	South Africa	2018
	Pyraclostrobin	0.082	Orange	Zimbabwe	2018
	Pyraclostrobin	0.043	Orange	Zimbabwe	2018
	Pyraclostrobin	0.077	Orange	Spain	2018
	Pyraclostrobin	0.074	Orange	South Africa	2018
	Pyraclostrobin	0.138	Orange	South Africa	2018
	Pyraclostrobin	0.043	Orange	South Africa	2018
	Pyraclostrobin	0.032	Orange	South Africa	2018
	Pyraclostrobin	0.018	Orange	South Africa	2018
	Pyraclostrobin	0.027	Orange	South Africa	2018
	Pyraclostrobin	0.034	Orange	South Africa	2018
	Pyraclostrobin	0.011	Plum	Serbia	2018
	Pyraclostrobin	0.041	Plum	Italy	2018
	Pyraclostrobin	0.016	Sweet cherry	Greece	2018
	Pyridaben	0.028	Grapefruit	Turkey	2018
	Pyridaben	0.05	Grapefruit	Turkey	2018
	Pyridaben	0.015	Apple	Bosnia and Herzegovina	2018
	Pyridaben	0.018	Peanut	Argentina	2018
	Pyridaben	0.028	Lemon	Turkey	2018
	Pyridaben	0.014	Lemon	Turkey	2018
	Pyridaben	0.135	Lemon	Turkey	2018
	Pyridaben	0.039	Mandarin	Swaziland	2018
	Pyridaben	0.048	Orange	Turkey	2018
	Pyridaben	0.013	Orange	Turkey	2018
	Pyrimethanil	0.011	Banana	Costa Rica	2018
	Pyrimethanil	0.01	Banana	Ecuador	2018
	Pyrimethanil	0.019	Grapefruit	Turkey	2018
	Pyrimethanil	0.015	Grapefruit	Turkey	2018
	Pyrimethanil	0.024	Grapefruit	Turkey	2018
	Pyrimethanil	0.145	Grapefruit	Turkey	2018
	Pyrimethanil	0.021	Grapefruit	Turkey	2018
	Pyrimethanil	0.013	Grapefruit	South Africa	2018
	Pyrimethanil	0.095	Grapefruit	Turkey	2018
	Pyrimethanil	0.526	Grapefruit	South Africa	2018
	Pyrimethanil	2.334	Grapefruit	South Africa	2018
	Pyrimethanil	0.137	Grapes	North Macedonia	2018
	Pyrimethanil	0.039	Grapes	North Macedonia	2018
	Pyrimethanil	1.1	Grapes	Italy	2018
	Pyrimethanil	1.733	Grapes	Greece	2018
	Pyrimethanil	0.051	Apple	Serbia	2018
	Pyrimethanil	0.051	Apple	Serbia	2018
	Pyrimethanil	0.026	Apple	Poland	2018
	Pyrimethanil	1.468	Strawberry	Albania	2018
	Pyrimethanil	0.015	Kiwi	Italy	2018
	Pyrimethanil	0.042	Pear	Italy	2018
	Pyrimethanil	0.014	Pear	The Netherlands	2018
	Pyrimethanil	0.012	Lime	Turkey	2018
	Pyrimethanil	0.022	Lime	Guatemala	2018
	Pyrimethanil	0.016	Lemon	Turkey	2018
	Pyrimethanil	0.752	Lemon	South Africa	2018
	Pyrimethanil	0.013	Lemon	South Africa	2018
	Pyrimethanil	1.46	Lemon	Turkey	2018
	Pyrimethanil	0.011	Lemon	Argentina	2018
	Pyrimethanil	0.234	Lemon	Argentina	2018
	Pyrimethanil	0.014	Lemon	Argentina	2018
	Pyrimethanil	0.041	Lemon	Turkey	2018
	Pyrimethanil	0.015	Lemon	Argentina	2018
	Pyrimethanil	0.033	Lemon	Turkey	2018
	Pyrimethanil	0.012	Lemon	Turkey	2018
	Pyrimethanil	1.688	Lemon	Turkey	2018
	Pyrimethanil	0.015	Lemon	Turkey	2018
	Pyrimethanil	1.81	Lemon	Argentina	2018
	Pyrimethanil	0.344	Lemon	South Africa	2018
	Pyrimethanil	1.322	Lemon	South Africa	2018
	Pyrimethanil	0.029	Lemon	Turkey	2018
	Pyrimethanil	0.025	Lemon	Turkey	2018
	Pyrimethanil	0.016	Lemon	Argentina	2018
	Pyrimethanil	0.024	Lemon	South Africa	2018
	Pyrimethanil	1.45	Lemon	South Africa	2018
	Pyrimethanil	1.41	Lemon	Argentina	2018
	Pyrimethanil	0.013	Mandarin	Swaziland	2018
	Pyrimethanil	0.237	Mandarin	Turkey	2018
	Pyrimethanil	0.036	Mandarin	Turkey	2018
	Pyrimethanil	0.233	Mandarin	Turkey	2018
	Pyrimethanil	0.38	Mandarin	Turkey	2018
	Pyrimethanil	0.094	Mandarin	Turkey	2018
	Pyrimethanil	0.014	Mandarin	Turkey	2018
	Pyrimethanil	0.779	Mandarin	Turkey	2018
	Pyrimethanil	0.075	Mandarin	Turkey	2018
	Pyrimethanil	0.293	Mandarin	Turkey	2018
	Pyrimethanil	0.011	Mandarin	Turkey	2018
	Pyrimethanil	1.446	Mandarin	Morocco	2018
	Pyrimethanil	1.016	Mandarin	Cyprus	2018
	Pyrimethanil	0.576	Mandarin	Cyprus	2018
	Pyrimethanil	0.016	Orange	South Africa	2018
	Pyrimethanil	1.744	Orange	South Africa	2018
	Pyrimethanil	2.372	Orange	Spain	2018
	Pyrimethanil	1.205	Orange	South Africa	2018
	Pyrimethanil	0.107	Orange	The Netherlands	2018
	Pyrimethanil	0.174	Orange	Spain	2018
	Pyrimethanil	0.69	Orange	Turkey	2018
	Pyrimethanil	0.023	Orange	Turkey	2018
	Pyrimethanil	1.466	Orange	Spain	2018
	Pyrimethanil	1.037	Orange	Turkey	2018
	Pyrimethanil	0.136	Orange	Turkey	2018
	Pyrimethanil	0.815	Orange	Spain	2018
	Pyrimethanil	1.029	Orange	Turkey	2018
	Pyrimethanil	0.08	Orange	Turkey	2018
	Pyrimethanil	0.052	Orange	Turkey	2018
	Pyrimethanil	0.024	Orange	Egypt	2018
	Pyrimethanil	0.908	Orange	Spain	2018
	Pyrimethanil	0.312	Orange	Spain	2018
	Pyrimethanil	0.644	Orange	Egypt	2018
	Pyrimethanil	1.01	Orange	South Africa	2018
	Pyrimethanil	1.914	Orange	South Africa	2018
	Pyrimethanil	0.015	Orange	South Africa	2018
	Pyrimethanil	0.147	Orange	South Africa	2018
	Pyrimethanil	0.104	Orange	South Africa	2018
	Pyrimethanil	0.065	Orange	South Africa	2018
	Pyrimethanil	1.569	Orange	South Africa	2018
	Pyrimethanil	0.065	Orange	Zimbabwe	2018
	Pyrimethanil	0.012	Orange	Turkey	2018
	Pyrimethanil	0.653	Orange	South Africa	2018
	Pyriproxyfen	0.136	Grapefruit	Turkey	2018
	Pyriproxyfen	0.048	Grapefruit	Turkey	2018
	Pyriproxyfen	0.056	Grapefruit	Turkey	2018
	Pyriproxyfen	0.037	Grapefruit	South Africa	2018
	Pyriproxyfen	0.095	Grapefruit	Turkey	2018
	Pyriproxyfen	0.014	Grapefruit	South Africa	2018
	Pyriproxyfen	0.029	Grapefruit	South Africa	2018
	Pyriproxyfen	0.014	Grapefruit	Turkey	2018
	Pyriproxyfen	0.014	Grapefruit	South Africa	2018
	Pyriproxyfen	0.014	Grapefruit	South Africa	2018
	Pyriproxyfen	0.037	Grapefruit	Turkey	2018
	Pyriproxyfen	0.022	Apple	Serbia	2018
	Pyriproxyfen	0.013	Apple	Serbia	2018
	Pyriproxyfen	0.01	Apple	Serbia	2018
	Pyriproxyfen	0.033	Lime	Turkey	2018
	Pyriproxyfen	0.036	Lemon	Turkey	2018
	Pyriproxyfen	0.014	Lemon	Argentina	2018
	Pyriproxyfen	0.016	Lemon	Argentina	2018
	Pyriproxyfen	0.058	Lemon	Turkey	2018
	Pyriproxyfen	0.033	Lemon	Turkey	2018
	Pyriproxyfen	0.016	Lemon	Turkey	2018
	Pyriproxyfen	0.017	Lemon	South Africa	2018
	Pyriproxyfen	0.023	Lemon	Turkey	2018
	Pyriproxyfen	0.052	Lemon	Turkey	2018
	Pyriproxyfen	0.048	Lemon	Turkey	2018
	Pyriproxyfen	0.041	Mandarin	Swaziland	2018
	Pyriproxyfen	0.028	Mandarin	Turkey	2018
	Pyriproxyfen	0.011	Mandarin	Greece	2018
	Pyriproxyfen	0.018	Mandarin	Turkey	2018
	Pyriproxyfen	0.027	Mandarin	Turkey	2018
	Pyriproxyfen	0.019	Mandarin	Croatia	2018
	Pyriproxyfen	0.016	Mandarin	Greece	2018
	Pyriproxyfen	0.041	Mandarin	Turkey	2018
	Pyriproxyfen	0.015	Mandarin	Turkey	2018
	Pyriproxyfen	0.011	Mandarin	Turkey	2018
	Pyriproxyfen	0.022	Mandarin	Turkey	2018
	Pyriproxyfen	0.051	Mandarin	Turkey	2018
	Pyriproxyfen	0.023	Mandarin	Croatia	2018
	Pyriproxyfen	0.022	Mandarin	Greece	2018
	Pyriproxyfen	0.019	Orange	South Africa	2018
	Pyriproxyfen	0.025	Orange	Turkey	2018
	Pyriproxyfen	0.072	Orange	Turkey	2018
	Pyriproxyfen	0.02	Orange	Spain	2018
	Pyriproxyfen	0.011	Orange	Egypt	2018
	Pyriproxyfen	0.043	Orange	South Africa	2018
	Pyriproxyfen	0.023	Orange	South Africa	2018
	Pyriproxyfen	0.013	Orange	South Africa	2018
	Pyriproxyfen	0.02	Orange	South Africa	2018
	Pyriproxyfen	0.01	Orange	Turkey	2018
	Pyriproxyfen	0.018	Sweet cherry	Serbia	2018
	Spinoteram B	0.017	Pomegranate	Turkey	2018
	Spirodiclofen	0.026	Grapefruit	Turkey	2018
	Spirodiclofen	0.052	Grapefruit	Turkey	2018
	Spirodiclofen	0.014	Grapes	Italy	2018
	Spirodiclofen	0.037	Apple	Serbia	2018
	Spirodiclofen	0.01	Apple	Serbia	2018
	Spirodiclofen	0.014	Apple	Serbia	2018
	Spirodiclofen	0.013	Pear	Serbia	2018
	Spirodiclofen	0.014	Lemon	Turkey	2018
	Spiromesifen	0.366	Grapefruit	Turkey	2018
	Spiromesifen	0.344	Grapefruit	Turkey	2018
	Spiromesifen	0.406	Grapefruit	Turkey	2018
	Spiromesifen	0.013	Grapefruit	Turkey	2018
	Spiromesifen	0.013	Apple	Serbia	2018
	Spiromesifen	0.011	Apple	Poland	2018
	Spiromesifen	0.01	Kiwi	Greece	2018
	Spiromesifen	0.014	Kumquat	Italy	2018
	Spiromesifen	0.011	Lime	Mexico	2018
	Spiromesifen	0.397	Mandarin	Turkey	2018
	Spiromesifen	0.012	Mandarin	Cyprus	2018
	Spiromesifen	0.018	Mandarin	Cyprus	2018
	Spiromesifen	0.44	Pomegranate	Turkey	2018
	Spiromesifen	0.41	Pomegranate	Turkey	2018
	Spiromesifen	0.464	Pomegranate	Turkey	2018
	Spiromesifen	0.388	Pomegranate	Turkey	2018
	Spiromesifen	0.338	Pomegranate	Turkey	2018
	Spiromesifen	0.01	Orange	Greece	2018
	Spiromesifen	0.011	Orange	Turkey	2018
	Spirotetramat	0.011	Grapefruit	Turkey	2018
	Spirotetramat	0.012	Mandarin	Swaziland	2018
	Spirotetramat	0.011	Mandarin	Turkey	2018
	Spirotetramat	0.012	Mandarin	Egypt	2018
	Spirotetramat	0.01	Mandarin	Turkey	2018
	Spirotetramat	0.013	Mandarin	Turkey	2018
	Spirotetramat	0.015	Pomegranate	Turkey	2018
	Spiroxamine	0.036	Banana	Guatemala	2018
	Spiroxamine	0.031	Grapes	North Macedonia	2018
	Spiroxamine	0.02	Grapes	Italy	2018
	Spiroxamine	0.012	Grapes	North Macedonia	2018
	Spiroxamine	0.181	Grapes	Greece	2018
	Sulfentrazone	0.024	Grapefruit	Turkey	2018
	Sulfentrazone	0.026	Grapefruit	Turkey	2018
	Sulfentrazone	0.01	Pomegranate	Turkey	2018
	Sulfentrazone	0.01	Pomegranate	Turkey	2018
	Tebuconazole	0.045	Ananas	Colombia	2018
	Tebuconazole	0.059	Ananas	Colombia	2018
	Tebuconazole	0.027	Peach	Greece	2018
	Tebuconazole	0.129	Peach	Serbia	2018
	Tebuconazole	0.013	Peach	Greece	2018
	Tebuconazole	0.045	Peach	Greece	2018
	Tebuconazole	0.014	Peach	France	2018
	Tebuconazole	0.036	Grapefruit	Turkey	2018
	Tebuconazole	0.025	Grapes	North Macedonia	2018
	Tebuconazole	0.019	Grapes	North Macedonia	2018
	Tebuconazole	0.059	Apple	Serbia	2018
[truncated: 255 more rows]

## Sheet: 2019
Supplementary material 2
	Analyte	Value (mg/kg)	Matrix	Country	Year
		/	Ananas	Costa Rica	2019
		/	Ananas	Costa Rica	2019
		/	Ananas	Costa Rica	2019
		/	Avocado	Peru	2019
		/	Avocado	Zimbabwe	2019
		/	Avocado	Kenya	2019
		/	Avocado	Kenya	2019
		/	Avocado	Peru	2019
		/	Avocado	Chile	2019
		/	Avocado	Israel	2019
		/	Almond	The United States of America	2019
		/	Almond	Spain	2019
		/	Banana	Colombia	2019
		/	Banana	Honduras	2019
		/	Banana	Ecuador	2019
		/	Banana	Colombia	2019
		/	Banana	Colombia	2019
		/	Banana	Ecuador	2019
		/	Banana	Colombia	2019
		/	Banana	Dominican Republic	2019
		/	Banana	Colombia	2019
		/	Banana	Costa Rica	2019
		/	Banana	Costa Rica	2019
		/	Blueberry	Spain	2019
		/	Blueberry	The Netherlands	2019
		/	Brazil nut	Bolivia	2019
		/	Peach	Serbia	2019
		/	Peach	Spain	2019
		/	Peach	Greece	2019
		/	Peach	Italy	2019
		/	Peach	Serbia	2019
		/	Peach	Serbia	2019
		/	Peach	Greece	2019
		/	Peach	Greece	2019
		/	Peach	Greece	2019
		/	Peach	Greece	2019
		/	Grapefruit	Turkey	2019
		/	Grapefruit	Turkey	2019
		/	Grapefruit	Turkey	2019
		/	Grapefruit	Turkey	2019
		/	Grapes	North Macedonia	2019
		/	Grapes	North Macedonia	2019
		/	Grapes	North Macedonia	2019
		/	Grapes	North Macedonia	2019
		/	Grapes	North Macedonia	2019
		/	Grapes	North Macedonia	2019
		/	Grapes	Turkey	2019
		/	Grapes	North Macedonia	2019
		/	Grapes	North Macedonia	2019
		/	Grapes	North Macedonia	2019
		/	Grapes	North Macedonia	2019
		/	Grapes	North Macedonia	2019
		/	Grapes	North Macedonia	2019
		/	Grapes	North Macedonia	2019
		/	Grapes	North Macedonia	2019
		/	Grapes	North Macedonia	2019
		/	Grapes	North Macedonia	2019
		/	Grapes	North Macedonia	2019
		/	Grapes	North Macedonia	2019
		/	Grapes	North Macedonia	2019
		/	Grapes	North Macedonia	2019
		/	Grapes	North Macedonia	2019
		/	Grapes	North Macedonia	2019
		/	Grapes	North Macedonia	2019
		/	Grapes	North Macedonia	2019
		/	Grapes	North Macedonia	2019
		/	Grapes	North Macedonia	2019
		/	Grapes	North Macedonia	2019
		/	Grapes	Italy	2019
		/	Grapes	Serbia	2019
		/	Apple	Albania	2019
		/	Apple	Albania	2019
		/	Apple	Poland	2019
		/	Apple	Poland	2019
		/	Apple	Serbia	2019
		/	Apple	Poland	2019
		/	Apple	Austria	2019
		/	Apple	The Netherlands	2019
		/	Apple	Italy	2019
		/	Apple	North Macedonia	2019
		/	Apple	Chile	2019
		/	Apple	Italy	2019
		/	Apple	Serbia	2019
		/	Apple	Serbia	2019
		/	Apple	Poland	2019
		/	Apple	Poland	2019
		/	Apple	Poland	2019
		/	Apple	Poland	2019
		/	Apple	Poland	2019
		/	Apple	Poland	2019
		/	Apple	Poland	2019
		/	Apple	Italy	2019
		/	Apple	Poland	2019
		/	Apple	Croatia	2019
		/	Strawberry	Greece	2019
		/	Strawberry	Albania	2019
		/	Strawberry	Albania	2019
		/	Strawberry	Greece	2019
		/	Strawberry	Greece	2019
		/	Strawberry	Greece	2019
		/	Strawberry	Turkey	2019
		/	Strawberry	Greece	2019
		/	Strawberry	Greece	2019
		/	Strawberry	Greece	2019
		/	Apricot	Greece	2019
		/	Apricot	Greece	2019
		/	Apricot	Greece	2019
		/	Apricot	Serbia	2019
		/	Apricot	Spain	2019
		/	Apricot	Italy	2019
		/	Apricot	Spain	2019
		/	Japanese apple	Spain	2019
		/	Japanese apple	Spain	2019
		/	Japanese apple	Spain	2019
		/	Japanese apple	Spain	2019
		/	Japanese apple	Spain	2019
		/	Japanese apple	Spain	2019
		/	Carambola	Malesia	2019
		/	Carambola	Malesia	2019
		/	Chestnut	China	2019
		/	Peanut	China	2019
		/	Peanut	Argentina	2019
		/	Peanut	China	2019
		/	Kiwi	Chile	2019
		/	Kiwi	Greece	2019
		/	Kiwi	Greece	2019
		/	Kiwi	Greece	2019
		/	Kiwi	Greece	2019
		/	Kiwi	New Zealand	2019
		/	Kiwi	Greece	2019
		/	Kiwi	Greece	2019
		/	Kiwi	New Zealand	2019
		/	Kiwi	Chile	2019
		/	Kiwi	Greece	2019
		/	Kiwi	Italy	2019
		/	Kiwi	Greece	2019
		/	Kiwi	Italy	2019
		/	Kiwi	New Zealand	2019
		/	Kiwi	Italy	2019
		/	Kiwi	Italy	2019
		/	Clementine	Italy	2019
		/	Clementine	Spain	2019
		/	Pear	The Netherlands	2019
		/	Pear	The Netherlands	2019
		/	Pear	Argentina	2019
		/	Pear	Spain	2019
		/	Pear	The Netherlands	2019
		/	Pear	Serbia	2019
		/	Pear	Serbia	2019
		/	Pear	Serbia	2019
		/	Pear	The Netherlands	2019
		/	Pear	South Africa	2019
		/	Pear	The Netherlands	2019
		/	Hazelnut	Turkey	2019
		/	Hazelnut	Croatia	2019
		/	Hazelnut	Georgia	2019
		/	Lychee	Chile	2019
		/	Lime	Mexico	2019
		/	Lemon	Argentina	2019
		/	Lemon	South Africa	2019
		/	Lemon	Spain	2019
		/	Lemon	Greece	2019
		/	Lemon	Spain	2019
		/	Lemon	Greece	2019
		/	Lemon	Turkey	2019
		/	Lemon	Turkey	2019
		/	Lemon	Turkey	2019
		/	Lemon	Turkey	2019
		/	Lemon	Turkey	2019
		/	Mandarin	Turkey	2019
		/	Mandarin	Turkey	2019
		/	Mandarin	Italy	2019
		/	Mandarin	Greece	2019
		/	Mandarin	Greece	2019
		/	Mandarin	Greece	2019
		/	Mandarin	Greece	2019
		/	Mandarin	Turkey	2019
		/	Mandarin	Turkey	2019
		/	Mandarin	Turkey	2019
		/	Mandarin	Turkey	2019
		/	Mandarin	Turkey	2019
		/	Mandarin	Turkey	2019
		/	Mandarin	Turkey	2019
		/	Mandarin	Turkey	2019
		/	Mandarin	Turkey	2019
		/	Mandarin	Turkey	2019
		/	Mandarin	Turkey	2019
		/	Mandarin	Turkey	2019
		/	Mandarin	Turkey	2019
		/	Mandarin	Turkey	2019
		/	Mandarin	Turkey	2019
		/	Mango	Peru	2019
		/	Mango	Brazil	2019
		/	Mango	Peru	2019
		/	Mango	Mali	2019
		/	Mango	Senegal	2019
		/	Mango	Dominican Republic	2019
		/	Mango	Brazil	2019
		/	Mango	Mali	2019
		/	Mango	Brazil	2019
		/	Pomegranate	Greece	2019
		/	Pomegranate	Turkey	2019
		/	Pomegranate	Turkey	2019
		/	Pomegranate	Turkey	2019
		/	Pomegranate	Turkey	2019
		/	Pomegranate	Peru	2019
		/	Pomegranate	Turkey	2019
		/	Pomegranate	Greece	2019
		/	Pomegranate	Turkey	2019
		/	Pomegranate	Turkey	2019
		/	Pomegranate	Turkey	2019
		/	Peach (nectarine)	Greece	2019
		/	Peach (nectarine)	Greece	2019
		/	Peach (nectarine)	Greece	2019
		/	Peach (nectarine)	Italy	2019
		/	Peach (nectarine)	Spain	2019
		/	Peach (nectarine)	Italy	2019
		/	Peach (nectarine)	Spain	2019
		/	Walnut	The United States of America	2019
		/	Walnut	Ukraine	2019
		/	Walnut	Bulgaria	2019
		/	Passion fruit	South Africa	2019
		/	Pitaya	Thailand	2019
		/	Pitaya	Vietnam	2019
		/	Pomelo	China	2019
		/	Pomelo	China	2019
		/	Orange	Greece	2019
		/	Orange	Greece	2019
		/	Orange	Greece	2019
		/	Orange	Greece	2019
		/	Orange	Greece	2019
		/	Orange	Turkey	2019
		/	Orange	Greece	2019
		/	Orange	Greece	2019
		/	Orange	Greece	2019
		/	Orange	Greece	2019
		/	Orange	Greece	2019
		/	Orange	Greece	2019
		/	Orange	Greece	2019
		/	Orange	Greece	2019
		/	Orange	Egypt	2019
		/	Orange	Greece	2019
		/	Orange	Egypt	2019
		/	Orange	South Africa	2019
		/	Orange	South Africa	2019
		/	Orange	Greece	2019
		/	Orange	Greece	2019
		/	Orange	Greece	2019
		/	Orange	Greece	2019
		/	Orange	Greece	2019
		/	Orange	Greece	2019
		/	Orange	Greece	2019
		/	Orange	Egypt	2019
		/	Orange	Egypt	2019
		/	Plum	Greece	2019
		/	Plum	Serbia	2019
		/	Plum	Serbia	2019
		/	Plum	Serbia	2019
		/	Plum	Italy	2019
		/	Fig	Turkey	2019
		/	Sweet cherry	Greece	2019
		/	Date palm	Iran	2019
		/	Date palm	Iran	2019
		/	Date palm	Iran	2019
		/	Date palm	Israel	2019
	2-Phenylphenol	0.275	Grapefruit	Cyprus	2019
	2-Phenylphenol	0.039	Grapefruit	South Africa	2019
	2-Phenylphenol	0.188	Grapefruit	South Africa	2019
	2-Phenylphenol	5.896	Grapefruit	Turkey	2019
	2-Phenylphenol	0.282	Grapefruit	Turkey	2019
	2-Phenylphenol	0.01	Kiwi	Greece	2019
	2-Phenylphenol	0.315	Clementine	Spain	2019
	2-Phenylphenol	0.275	Kumquat	Italy	2019
	2-Phenylphenol	0.631	Lemon	Spain	2019
	2-Phenylphenol	0.062	Lemon	Egypt	2019
	2-Phenylphenol	1.379	Lemon	Uruguay	2019
	2-Phenylphenol	0.031	Lemon	South Africa	2019
	2-Phenylphenol	0.015	Lemon	Spain	2019
	2-Phenylphenol	1.133	Lemon	Argentina	2019
	2-Phenylphenol	0.011	Lemon	Argentina	2019
	2-Phenylphenol	0.051	Lemon	Spain	2019
	2-Phenylphenol	0.016	Mandarin	Spain	2019
	2-Phenylphenol	0.096	Mandarin	Turkey	2019
	2-Phenylphenol	0.17	Mandarin	Turkey	2019
	2-Phenylphenol	0.121	Mandarin	Greece	2019
	2-Phenylphenol	2.825	Mandarin	Greece	2019
	2-Phenylphenol	0.15	Mandarin	Turkey	2019
	2-Phenylphenol	0.165	Mandarin	Greece	2019
	2-Phenylphenol	0.169	Mandarin	Greece	2019
	2-Phenylphenol	4.848	Mandarin	Turkey	2019
	2-Phenylphenol	0.132	Mandarin	Albania	2019
	2-Phenylphenol	2.133	Mandarin	Turkey	2019
	2-Phenylphenol	7.028	Mandarin	Turkey	2019
	2-Phenylphenol	2.16	Mandarin	Turkey	2019
	2-Phenylphenol	2.92	Mandarin	Turkey	2019
	2-Phenylphenol	2.22	Mandarin	Turkey	2019
	2-Phenylphenol	0.028	Pomelo	China	2019
	2-Phenylphenol	0.011	Orange	Spain	2019
	2-Phenylphenol	0.062	Orange	South Africa	2019
	2-Phenylphenol	0.096	Orange	South Africa	2019
	2-Phenylphenol	1.063	Orange	Egypt	2019
	2-Phenylphenol	0.114	Orange	Greece	2019
	2-Phenylphenol	2.163	Orange	Greece	2019
	2-Phenylphenol	0.193	Orange	Spain	2019
	2-Phenylphenol	0.336	Orange	Greece	2019
	2-Phenylphenol	0.08	Orange	Greece	2019
	2-Phenylphenol	0.125	Orange	Zimbabwe	2019
	2-Phenylphenol	0.184	Orange	Turkey	2019
	2-Phenylphenol	0.083	Orange	Turkey	2019
	Acetamiprid	0.384	Banana	Honduras	2019
	Acetamiprid	0.06	Grapefruit	Cyprus	2019
	Acetamiprid	0.012	Grapefruit	South Africa	2019
	Acetamiprid	0.037	Grapefruit	Turkey	2019
	Acetamiprid	0.011	Grapefruit	South Africa	2019
	Acetamiprid	0.017	Grapefruit	Turkey	2019
	Acetamiprid	0.121	Grapefruit	Turkey	2019
	Acetamiprid	0.089	Grapefruit	Turkey	2019
	Acetamiprid	0.011	Grapes	Italy	2019
	Acetamiprid	0.089	Grapes	Chile	2019
	Acetamiprid	0.099	Apple	Serbia	2019
	Acetamiprid	0.027	Apple	North Macedonia	2019
	Acetamiprid	0.124	Apple	Serbia	2019
	Acetamiprid	0.15	Apple	Serbia	2019
	Acetamiprid	0.024	Apple	Serbia	2019
	Acetamiprid	0.151	Apple	Serbia	2019
	Acetamiprid	0.025	Apple	Poland	2019
	Acetamiprid	0.01	Apple	Poland	2019
	Acetamiprid	0.018	Apple	Slovenia	2019
	Acetamiprid	0.013	Apple	Poland	2019
	Acetamiprid	0.021	Apple	Poland	2019
	Acetamiprid	0.015	Apricot	Serbia	2019
	Acetamiprid	0.027	Kiwi	North Macedonia	2019
	Acetamiprid	0.038	Pear	Spain	2019
	Acetamiprid	0.037	Pear	Italy	2019
	Acetamiprid	0.028	Lemon	Turkey	2019
	Acetamiprid	0.043	Mandarin	Turkey	2019
	Acetamiprid	0.219	Mandarin	Turkey	2019
	Acetamiprid	0.033	Mandarin	Turkey	2019
	Acetamiprid	0.032	Pomegranate	Turkey	2019
	Acetamiprid	0.041	Pomegranate	Turkey	2019
	Acetamiprid	0.017	Pomegranate	Turkey	2019
	Acetamiprid	0.086	Pomegranate	Turkey	2019
	Acetamiprid	0.018	Pomegranate	Turkey	2019
	Acetamiprid	0.068	Pomegranate	Turkey	2019
	Acetamiprid	0.01	Pomegranate	Turkey	2019
	Acetamiprid	0.017	Pomegranate	Turkey	2019
	Acetamiprid	0.013	Pomelo	China	2019
	Acetamiprid	0.122	Orange	Turkey	2019
	Acetochlor	0.01	Grapes	Serbia	2019
	Acetochlor	0.01	Currants	The Netherlands	2019
	Acibenzolar-S-methyl	0.01	Mandarin	Turkey	2019
	Acrinathrin	0.02	Orange	Egypt	2019
	Acrinathrin	0.011	Sour cherry	Hungary	2019
	Amitraz	0.012	Banana	Ecuador	2019
	Amitraz	0.011	Grapes	India	2019
	Amitraz	0.017	Apple	Serbia	2019
	Amitraz	0.011	Apple	Poland	2019
	Amitraz	0.02	Apple	Poland	2019
	Amitraz	0.011	Lemon	Spain	2019
	Amitraz	0.01	Lemon	Argentina	2019
	Amitraz	0.015	Pomegranate	Turkey	2019
	Amitraz	0.014	Pomegranate	Turkey	2019
	Amitraz	0.017	Pomegranate	Turkey	2019
	Amitraz	0.012	Pomegranate	Turkey	2019
	Azinphos-ethyl	0.012	Grapefruit	South Africa	2019
	Azinphos-ethyl	0.013	Grapefruit	South Africa	2019
	Azinphos-ethyl	0.982	Grapefruit	South Africa	2019
	Azinphos-ethyl	0.02	Grapefruit	Turkey	2019
	Azinphos-ethyl	0.011	Grapefruit	Turkey	2019
	Azinphos-ethyl	0.01	Lemon	Spain	2019
	Azinphos-methyl	0.01	Grapefruit	South Africa	2019
	Azinphos-methyl	0.011	Grapefruit	South Africa	2019
	Azinphos-methyl	0.021	Apple	Albania	2019
	Azinphos-methyl	0.042	Kiwi	Greece	2019
	Azinphos-methyl	0.018	Lemon	Spain	2019
	Azoxystrobin	0.168	Banana	Costa Rica	2019
	Azoxystrobin	0.098	Banana	Costa Rica	2019
	Azoxystrobin	0.135	Banana	Costa Rica	2019
	Azoxystrobin	0.237	Banana	Colombia	2019
	Azoxystrobin	0.052	Banana	Colombia	2019
	Azoxystrobin	0.018	Banana	Colombia	2019
	Azoxystrobin	0.012	Banana	Colombia	2019
	Azoxystrobin	0.023	Banana	Colombia	2019
	Azoxystrobin	0.114	Banana	Colombia	2019
	Azoxystrobin	0.175	Banana	Panama	2019
	Azoxystrobin	0.109	Banana	Colombia	2019
	Azoxystrobin	0.046	Banana	Honduras	2019
	Azoxystrobin	0.01	Banana	Honduras	2019
	Azoxystrobin	0.035	Banana	Colombia	2019
	Azoxystrobin	0.144	Banana	Honduras	2019
	Azoxystrobin	0.074	Banana	Guatemala	2019
	Azoxystrobin	0.072	Banana	Colombia	2019
	Azoxystrobin	0.13	Banana	Colombia	2019
	Azoxystrobin	0.011	Banana	Colombia	2019
	Azoxystrobin	0.053	Banana	Costa Rica	2019
	Azoxystrobin	0.019	Banana	Costa Rica	2019
	Azoxystrobin	0.064	Banana	Honduras	2019
	Azoxystrobin	0.084	Grapefruit	South Africa	2019
	Azoxystrobin	0.031	Grapes	Serbia	2019
	Azoxystrobin	0.035	Strawberry	Spain	2019
	Azoxystrobin	0.01	Pear	China	2019
	Azoxystrobin	0.068	Lime	Mexico	2019
	Azoxystrobin	0.027	Lime	Brazil	2019
	Azoxystrobin	0.101	Lime	Mexico	2019
	Azoxystrobin	0.013	Lemon	Spain	2019
	Azoxystrobin	0.717	Lemon	Argentina	2019
	Azoxystrobin	0.183	Lemon	Argentina	2019
	Azoxystrobin	0.292	Lemon	Argentina	2019
	Azoxystrobin	0.018	Lemon	Argentina	2019
	Azoxystrobin	0.037	Lemon	South Africa	2019
	Azoxystrobin	0.032	Lemon	South Africa	2019
	Azoxystrobin	0.259	Lemon	Argentina	2019
	Azoxystrobin	0.186	Lemon	Argentina	2019
	Azoxystrobin	0.354	Lemon	Argentina	2019
	Azoxystrobin	0.029	Lemon	Uruguay	2019
	Azoxystrobin	0.118	Mango	Brazil	2019
	Bendiocarb	0.01	Lemon	Spain	2019
	Bifenazate	0.011	Apple	Poland	2019
	Bifenazate	0.013	Apple	Poland	2019
	Bifenazate	0.011	Strawberry	Albania	2019
	Bifenthrin	0.01	Ananas	Costa Rica	2019
	Bifenthrin	0.012	Banana	Costa Rica	2019
	Bifenthrin	0.012	Banana	Ecuador	2019
	Bifenthrin	0.015	Banana	Ecuador	2019
	Bifenthrin	0.015	Banana	Ecuador	2019
	Bifenthrin	0.081	Banana	Honduras	2019
	Bifenthrin	0.011	Banana	Ecuador	2019
	Bifenthrin	0.01	Banana	Ecuador	2019
	Bifenthrin	0.019	Banana	Ecuador	2019
	Bifenthrin	0.018	Banana	Costa Rica	2019
	Bifenthrin	0.028	Banana	Honduras	2019
	Bifenthrin	0.042	Lime	Brazil	2019
	Biphenyl	0.01	Apple	Serbia	2019
	Boscalid	0.015	Banana	Colombia	2019
	Boscalid	0.017	Banana	Mexico	2019
	Boscalid	0.048	Peach	Greece	2019
	Boscalid	0.097	Grapes	Bosnia and Herzegovina	2019
	Boscalid	0.666	Grapes	North Macedonia	2019
	Boscalid	0.06	Grapes	Turkey	2019
	Boscalid	0.011	Grapes	North Macedonia	2019
	Boscalid	0.194	Grapes	North Macedonia	2019
	Boscalid	1.043	Grapes	North Macedonia	2019
	Boscalid	0.801	Grapes	Turkey	2019
	Boscalid	0.911	Grapes	Chile	2019
	Boscalid	0.018	Apple	Italy	2019
	Boscalid	0.037	Apple	Italy	2019
	Boscalid	0.138	Apple	Serbia	2019
	Boscalid	0.019	Apple	Serbia	2019
	Boscalid	0.062	Apple	North Macedonia	2019
	Boscalid	0.013	Apple	Serbia	2019
	Boscalid	0.055	Apple	Poland	2019
	Boscalid	0.027	Apple	Poland	2019
	Boscalid	0.042	Apple	Poland	2019
	Boscalid	0.062	Kiwi	North Macedonia	2019
	Boscalid	0.043	Pear	Serbia	2019
	Boscalid	0.018	Pear	Greece	2019
	Boscalid	0.338	Pear	Serbia	2019
	Boscalid	0.054	Pear	The Netherlands	2019
	Boscalid	0.012	Pear	The Netherlands	2019
	Boscalid	0.049	Pear	Belgium	2019
	Boscalid	0.355	Pear	Italy	2019
	Boscalid	0.01	Pomegranate	Turkey	2019
	Boscalid	0.01	Pomegranate	Turkey	2019
	Boscalid	0.01	Pomegranate	Turkey	2019
	Boscalid	0.01	Pomegranate	Turkey	2019
	Boscalid	0.01	Pomegranate	Peru	2019
	Boscalid	0.015	Currants	The Netherlands	2019
	Buprofezin	0.027	Grapefruit	Turkey	2019
	Buprofezin	0.589	Grapefruit	Turkey	2019
	Buprofezin	0.068	Lemon	Turkey	2019
	Buprofezin	0.041	Lemon	Turkey	2019
	Buprofezin	0.025	Mandarin	Turkey	2019
	Buprofezin	0.047	Mandarin	Turkey	2019
	Buprofezin	0.029	Mandarin	Turkey	2019
	Buprofezin	0.02	Orange	Turkey	2019
	Buprofezin	0.015	Orange	Turkey	2019
	Butachlor	0.012	Mandarin	Greece	2019
	Carbaryl	0.01	Ananas	Colombia	2019
	Carbendazim	0.021	Ananas	Colombia	2019
	Carbendazim	0.015	Peach	Greece	2019
	Carbendazim	0.025	Peach	Spain	2019
	Carbendazim	0.019	Peach	Serbia	2019
	Carbendazim	0.029	Peach	Serbia	2019
	Carbendazim	0.064	Grapefruit	South Africa	2019
	Carbendazim	0.078	Grapes	Turkey	2019
	Carbendazim	0.117	Apple	Poland	2019
	Carbendazim	0.131	Apple	North Macedonia	2019
	Carbendazim	0.024	Apple	Serbia	2019
	Carbendazim	0.016	Apple	Serbia	2019
	Carbendazim	0.075	Apple	Serbia	2019
	Carbendazim	0.18	Apple	Serbia	2019
	Carbendazim	0.097	Apple	Serbia	2019
	Carbendazim	0.071	Apple	Poland	2019
	Carbendazim	0.03	Apple	Poland	2019
	Carbendazim	0.037	Apple	Croatia	2019
	Carbendazim	0.017	Apple	Poland	2019
	Carbendazim	0.019	Apricot	Serbia	2019
	Carbendazim	0.128	Apricot	Serbia	2019
	Carbendazim	0.131	Kiwi	North Macedonia	2019
	Carbendazim	0.077	Pear	Serbia	2019
	Carbendazim	0.119	Lemon	Egypt	2019
	Carbendazim	0.023	Lemon	South Africa	2019
	Carbendazim	0.103	Lemon	Turkey	2019
	Carbendazim	0.023	Lemon	Turkey	2019
	Carbendazim	0.013	Lemon	Argentina	2019
	Carbendazim	0.033	Mandarin	Turkey	2019
	Carbendazim	0.036	Mandarin	Turkey	2019
	Carbendazim	0.061	Mango	Brazil	2019
	Carbendazim	0.395	Pomegranate	Turkey	2019
	Carbendazim	0.014	Pomegranate	Turkey	2019
	Carbendazim	0.498	Pomegranate	Turkey	2019
	Carbendazim	0.014	Peach (nectarine)	Serbia	2019
	Carbendazim	0.191	Peach (nectarine)	Serbia	2019
	Carbendazim	0.012	Orange	South Africa	2019
	Carbendazim	0.013	Orange	Zimbabwe	2019
	Carbendazim	0.013	Orange	South Africa	2019
	Carbendazim	0.01	Orange	Zimbabwe	2019
	Carbendazim	0.028	Orange	Morocco	2019
	Carbendazim	0.01	Orange	Egypt	2019
	Carbendazim	0.017	Orange	South Africa	2019
	Carbendazim	0.023	Plum	Serbia	2019
	Carbendazim	0.017	Plum	Serbia	2019
	Carbofuran	0.033	Mandarin	Spain	2019
	Carfentrazone-ethyl	0.012	Sour cherry	Hungary	2019
	Chlorantraniliprole	0.01	Apple	Serbia	2019
	Chlorantraniliprole	0.095	Apple	Serbia	2019
	Chlorantraniliprole	0.121	Apple	Serbia	2019
	Chlorantraniliprole	0.013	Apple	Serbia	2019
	Chlorantraniliprole	0.024	Apple	Serbia	2019
	Chlorantraniliprole	0.019	Apple	Serbia	2019
	Chlorantraniliprole	0.042	Apple	Serbia	2019
	Chlorantraniliprole	0.024	Apple	Serbia	2019
	Chlorothalonil	0.059	Banana	Colombia	2019
	Chlorothalonil	0.01	Banana	Colombia	2019
	Chlorothalonil	12.5	Grapes	North Macedonia	2019
	Chlorothalonil	0.016	Apple	Serbia	2019
	Chlorotoluron	0.01	Sour cherry	Hungary	2019
	Chlorpropham	0.01	Apple	Serbia	2019
	Chlorpropham	0.01	Kumquat	Italy	2019
	Chlorpyrifos	0.017	Banana	Ecuador	2019
	Chlorpyrifos	0.016	Banana	Guatemala	2019
	Chlorpyrifos	0.025	Banana	Ecuador	2019
	Chlorpyrifos	0.016	Banana	Ecuador	2019
	Chlorpyrifos	0.01	Banana	Ecuador	2019
	Chlorpyrifos	0.012	Banana	Honduras	2019
	Chlorpyrifos	0.013	Banana	Ecuador	2019
	Chlorpyrifos	0.021	Banana	Ecuador	2019
	Chlorpyrifos	0.017	Banana	Ecuador	2019
	Chlorpyrifos	0.156	Grapefruit	Turkey	2019
	Chlorpyrifos	0.034	Grapefruit	South Africa	2019
	Chlorpyrifos	0.056	Grapefruit	South Africa	2019
	Chlorpyrifos	0.064	Grapefruit	Turkey	2019
	Chlorpyrifos	0.245	Grapefruit	Turkey	2019
	Chlorpyrifos	0.074	Grapefruit	Turkey	2019
	Chlorpyrifos	0.017	Grapefruit	Turkey	2019
	Chlorpyrifos	0.015	Grapefruit	Turkey	2019
	Chlorpyrifos	0.01	Grapes	North Macedonia	2019
	Chlorpyrifos	0.023	Strawberry	Greece	2019
	Chlorpyrifos	0.014	Lime	Brazil	2019
	Chlorpyrifos	0.011	Lime	Mexico	2019
	Chlorpyrifos	0.097	Lime	Mexico	2019
	Chlorpyrifos	0.012	Lemon	Turkey	2019
	Chlorpyrifos	0.04	Lemon	Argentina	2019
	Chlorpyrifos	0.299	Lemon	Turkey	2019
	Chlorpyrifos	0.069	Lemon	Turkey	2019
	Chlorpyrifos	0.138	Lemon	Turkey	2019
	Chlorpyrifos	0.11	Lemon	Turkey	2019
	Chlorpyrifos	0.2	Lemon	Turkey	2019
	Chlorpyrifos	0.2	Lemon	Turkey	2019
	Chlorpyrifos	0.19	Lemon	Turkey	2019
	Chlorpyrifos	0.052	Lemon	Turkey	2019
	Chlorpyrifos	0.112	Lemon	Turkey	2019
	Chlorpyrifos	1.5	Mandarin	Turkey	2019
	Chlorpyrifos	0.211	Mandarin	Turkey	2019
	Chlorpyrifos	0.01	Mandarin	Greece	2019
	Chlorpyrifos	0.368	Mandarin	Greece	2019
	Chlorpyrifos	0.088	Mandarin	Turkey	2019
	Chlorpyrifos	0.15	Mandarin	Turkey	2019
	Chlorpyrifos	0.109	Mandarin	Turkey	2019
	Chlorpyrifos	0.197	Mandarin	Turkey	2019
	Chlorpyrifos	0.023	Mandarin	Turkey	2019
	Chlorpyrifos	0.012	Mango	Peru	2019
	Chlorpyrifos	0.01	Pomegranate	Turkey	2019
	Chlorpyrifos	0.011	Pomelo	China	2019
	Chlorpyrifos	0.027	Pomelo	China	2019
	Chlorpyrifos	0.027	Orange	Greece	2019
	Chlorpyrifos	0.3	Orange	Greece	2019
	Chlorpyrifos	0.012	Orange	Greece	2019
	Chlorpyrifos	0.232	Orange	Turkey	2019
	Chlorpyrifos	0.3	Orange	Greece	2019
	Chlorpyrifos	0.032	Orange	Greece	2019
	Chlorpyrifos	0.021	Orange	Greece	2019
	Chlorpyrifos	0.013	Orange	South Africa	2019
	Chlorpyrifos	0.062	Orange	Greece	2019
	Chlorpyrifos	0.222	Orange	Spain	2019
	Chlorpyrifos	0.016	Orange	Egypt	2019
	Chlorpyrifos	0.058	Orange	South Africa	2019
	Chlorpyrifos	0.135	Orange	Morocco	2019
	Chlorpyrifos	0.01	Orange	Egypt	2019
	Chlorpyrifos	0.01	Orange	South Africa	2019
	Chlorpyrifos-methyl	0.437	Grapefruit	Turkey	2019
	Chlorpyrifos-methyl	0.039	Grapefruit	Turkey	2019
	Chlorpyrifos-methyl	0.05	Grapefruit	Turkey	2019
	Chlorpyrifos-methyl	0.011	Grapes	Turkey	2019
	Chlorpyrifos-methyl	0.018	Apple	Italy	2019
	Chlorpyrifos-methyl	0.069	Lemon	Turkey	2019
	Chlorpyrifos-methyl	0.061	Lemon	Spain	2019
	Chlorpyrifos-methyl	0.013	Lemon	Spain	2019
	Chlorpyrifos-methyl	0.026	Lemon	Turkey	2019
	Chlorpyrifos-methyl	0.028	Lemon	Turkey	2019
	Chlorpyrifos-methyl	0.014	Lemon	Turkey	2019
	Chlorpyrifos-methyl	0.06	Mandarin	Spain	2019
	Chlorpyrifos-methyl	0.021	Mandarin	Turkey	2019
	Chlorpyrifos-methyl	0.014	Mandarin	Turkey	2019
	Chlorpyrifos-methyl	0.047	Mandarin	Turkey	2019
	Chlorpyrifos-methyl	0.105	Mandarin	Turkey	2019
	Chlorpyrifos-methyl	0.077	Mandarin	Turkey	2019
	Chlorpyrifos-methyl	0.059	Mandarin	Turkey	2019
	Chlorpyrifos-methyl	0.045	Mandarin	Turkey	2019
	Chlorpyrifos-methyl	0.021	Orange	Morocco	2019
	Chlorpyrifos-methyl	0.5	Orange	Spain	2019
	Chlorpyrifos-methyl	0.08	Orange	Morocco	2019
	Chlorpyrifos-methyl	0.074	Orange	Morocco	2019
	Chlorpyrifos-methyl	0.058	Orange	Spain	2019
	Chlorpyrifos-methyl	0.445	Orange	Spain	2019
	Chlorpyrifos-methyl	0.072	Orange	Turkey	2019
	Clofentezine	0.018	Strawberry	Albania	2019
	Clofentezine	0.017	Strawberry	Albania	2019
	Cyazofamid	0.054	Grapes	Bosnia and Herzegovina	2019
	Cyazofamid	0.091	Grapes	North Macedonia	2019
	Cyazofamid	0.111	Grapes	Italy	2019
	Cymoxanil	0.01	Orange	Italy	2019
	Cypermethrin	0.301	Grapefruit	South Africa	2019
	Cypermethrin	0.069	Grapefruit	South Africa	2019
	Cypermethrin	0.052	Apple	Serbia	2019
	Cypermethrin	0.022	Apple	Serbia	2019
	Cypermethrin	0.066	Mandarin	Turkey	2019
	Cypermethrin	0.039	Pomegranate	Turkey	2019
	Cyproconazole	0.01	Grapefruit	Turkey	2019
	Cyproconazole	0.016	Peach (nectarine)	Serbia	2019
	Cyprodinil	0.069	Grapes	North Macedonia	2019
	Cyprodinil	0.046	Grapes	Turkey	2019
	Cyprodinil	0.041	Grapes	Turkey	2019
	Cyprodinil	0.032	Apple	Poland	2019
	Cyprodinil	0.08	Strawberry	Spain	2019
	Cyprodinil	0.102	Strawberry	Greece	2019
	Cyprodinil	0.053	Pear	The Netherlands	2019
	Cyprodinil	0.016	Pear	The Netherlands	2019
	Cyprodinil	0.078	Pomegranate	Turkey	2019
	Deltamethrin	0.01	Apple	Serbia	2019
	Deltamethrin	0.01	Pear	Spain	2019
	Deltamethrin	0.01	Lemon	Spain	2019
	Deltamethrin	0.01	Mandarin	Greece	2019
	Deltamethrin	0.053	Pomegranate	Turkey	2019
	Deltamethrin	0.01	Orange	Turkey	2019
	Diazinon	0.01	Ananas	Costa Rica	2019
	Diazinon	0.01	Ananas	Costa Rica	2019
	Diazinon	0.01	Ananas	Costa Rica	2019
	Difenoconazole	0.021	Apple	Serbia	2019
	Difenoconazole	0.013	Strawberry	Greece	2019
	Difenoconazole	0.015	Lime	Brazil	2019
	Difenoconazole	0.018	Mandarin	Turkey	2019
	Difenoconazole	0.035	Pomelo	China	2019
	Difenoconazole	0.045	Orange	Turkey	2019
	Diflubenzuron	0.03	Pear	Serbia	2019
	Diflubenzuron	0.046	Pear	Serbia	2019
	Dimethomorph	0.128	Grapes	Italy	2019
	Dimethomorph	0.049	Grapes	Turkey	2019
	Dimethomorph	0.087	Grapes	South Africa	2019
	Dimethomorph	0.01	Grapes	India	2019
	Dimethomorph	0.215	Strawberry	Spain	2019
	Dimethomorph	0.01	Mandarin	Greece	2019
	Dimethomorph	0.01	Mandarin	Greece	2019
	Dimethomorph	0.01	Mandarin	Greece	2019
	Dimethomorph	0.01	Mandarin	Greece	2019
	Dimethomorph	0.01	Mandarin	Greece	2019
	Dimethomorph	0.01	Mandarin	Turkey	2019
	Dimethomorph	0.01	Mandarin	Turkey	2019
	Dimethomorph	0.01	Mandarin	Turkey	2019
	Dimethomorph	0.012	Orange	Spain	2019
	Dimethomorph	0.01	Orange	Spain	2019
	Dimethomorph	0.015	Orange	Greece	2019
	Dimethomorph	0.011	Orange	Spain	2019
	Dimethomorph	0.015	Orange	Turkey	2019
	Dimethomorph	0.012	Orange	Turkey	2019
	Diphenylamine	0.01	Lemon	Spain	2019
	Emamectin B1a	0.025	Grapes	Italy	2019
	Ethirimol	0.023	Grapes	Serbia	2019
	Etofenprox	0.141	Apple	Italy	2019
	Famoxadone	0.139	Grapes	Turkey	2019
	Famoxadone	0.04	Grapes	Turkey	2019
	Fenamiphos	0.012	Grapefruit	Zimbabwe	2019
	Fenamiphos	0.013	Orange	Zimbabwe	2019
	Fenamiphos	0.016	Orange	Turkey	2019
	Fenbuconazole	0.02	Peach	Greece	2019
	Fenbuconazole	0.01	Apple	North Macedonia	2019
	Fenbuconazole	0.01	Kiwi	North Macedonia	2019
	Fenhexamid	0.314	Grapes	Chile	2019
	Fenhexamid	0.188	Kiwi	Chile	2019
	Fenpropimorph	0.067	Banana	Colombia	2019
	Fenpyroximate	0.01	Lime	Brazil	2019
	Fenpyroximate	0.047	Lemon	South Africa	2019
	Fenvalerate	0.014	Grapefruit	South Africa	2019
	Fenvalerate	0.01	Grapefruit	Turkey	2019
	Fenvalerate	0.015	Grapefruit	South Africa	2019
	Fenvalerate	0.02	Lemon	Turkey	2019
	Fenvalerate	0.21	Lemon	Turkey	2019
	Fenvalerate	0.078	Mandarin	Turkey	2019
	Fenvalerate	0.012	Mandarin	Turkey	2019
	Fenvalerate	0.02	Mandarin	Turkey	2019
	Fenvalerate	0.208	Mandarin	Turkey	2019
	Fenvalerate	0.043	Pomegranate	Turkey	2019
	Fenvalerate	0.047	Pomegranate	Turkey	2019
	Fenvalerate	0.063	Pomegranate	Turkey	2019
	Fenvalerate	0.02	Pomegranate	Turkey	2019
	Fenvalerate	0.111	Pomegranate	Turkey	2019
	Fenvalerate	0.02	Pomegranate	Turkey	2019
	Fenvalerate	0.02	Pomegranate	Turkey	2019
	Fenvalerate	0.666	Orange	Turkey	2019
	Fenvalerate	0.11	Orange	Turkey	2019
	Fenvalerate	0.01	Orange	Turkey	2019
	Flonicamid	0.014	Apple	Serbia	2019
	Fluazifop-butyl	0.01	Grapefruit	Turkey	2019
	Fludioxonil	0.137	Ananas	Costa Rica	2019
	Fludioxonil	0.235	Ananas	Italy	2019
	Fludioxonil	0.218	Ananas	Costa Rica	2019
	Fludioxonil	0.02	Ananas	Costa Rica	2019
	Fludioxonil	0.023	Ananas	Costa Rica	2019
	Fludioxonil	0.052	Ananas	Costa Rica	2019
	Fludioxonil	0.136	Ananas	Costa Rica	2019
	Fludioxonil	0.546	Ananas	Costa Rica	2019
	Fludioxonil	0.99	Ananas	Colombia	2019
	Fludioxonil	1.325	Ananas	Colombia	2019
	Fludioxonil	0.015	Ananas	Costa Rica	2019
	Fludioxonil	0.076	Ananas	Costa Rica	2019
	Fludioxonil	0.883	Ananas	Ecuador	2019
	Fludioxonil	0.154	Ananas	Costa Rica	2019
	Fludioxonil	0.011	Banana	Ecuador	2019
	Fludioxonil	0.023	Peach	Serbia	2019
	Fludioxonil	0.081	Grapefruit	Turkey	2019
	Fludioxonil	0.144	Grapes	Bosnia and Herzegovina	2019
	Fludioxonil	0.428	Grapes	Italy	2019
	Fludioxonil	0.037	Grapes	North Macedonia	2019
	Fludioxonil	0.023	Grapes	North Macedonia	2019
	Fludioxonil	0.025	Grapes	North Macedonia	2019
	Fludioxonil	0.041	Grapes	North Macedonia	2019
	Fludioxonil	0.149	Grapes	Italy	2019
	Fludioxonil	0.011	Grapes	Turkey	2019
	Fludioxonil	0.024	Apple	Serbia	2019
	Fludioxonil	0.037	Apple	Serbia	2019
	Fludioxonil	0.017	Apple	Serbia	2019
	Fludioxonil	0.014	Apple	Serbia	2019
	Fludioxonil	0.044	Apple	Serbia	2019
	Fludioxonil	0.227	Apple	Serbia	2019
	Fludioxonil	0.06	Apple	Poland	2019
	Fludioxonil	0.015	Apple	Italy	2019
	Fludioxonil	0.015	Apple	Poland	2019
	Fludioxonil	0.04	Apple	Croatia	2019
	Fludioxonil	0.106	Apple	Poland	2019
	Fludioxonil	0.753	Strawberry	Spain	2019
	Fludioxonil	1.216	Strawberry	Greece	2019
	Fludioxonil	0.053	Kiwi	Greece	2019
	Fludioxonil	0.201	Kiwi	Italy	2019
	Fludioxonil	3.69	Kiwi	Italy	2019
	Fludioxonil	0.02	Pear	Spain	2019
	Fludioxonil	0.116	Pear	The Netherlands	2019
	Fludioxonil	0.178	Pear	The Netherlands	2019
	Fludioxonil	0.136	Pear	The Netherlands	2019
	Fludioxonil	0.16	Pear	Belgium	2019
	Fludioxonil	0.124	Pear	Argentina	2019
	Fludioxonil	0.017	Pear	The Netherlands	2019
	Fludioxonil	0.112	Pear	The Netherlands	2019
	Fludioxonil	0.019	Pear	The Netherlands	2019
	Fludioxonil	0.05	Lime	Mexico	2019
	Fludioxonil	0.147	Lime	Mexico	2019
	Fludioxonil	0.014	Lemon	Spain	2019
	Fludioxonil	0.53	Lemon	Argentina	2019
	Fludioxonil	0.275	Lemon	Argentina	2019
	Fludioxonil	0.228	Lemon	Argentina	2019
	Fludioxonil	1.297	Lemon	Spain	2019
	Fludioxonil	0.019	Lemon	South Africa	2019
	Fludioxonil	0.231	Lemon	Argentina	2019
	Fludioxonil	0.189	Lemon	Argentina	2019
	Fludioxonil	0.462	Lemon	Argentina	2019
	Fludioxonil	0.249	Lemon	Argentina	2019
	Fludioxonil	0.363	Mandarin	Greece	2019
	Fludioxonil	0.54	Mandarin	Spain	2019
	Fludioxonil	0.029	Mango	Peru	2019
	Fludioxonil	0.036	Mango	Peru	2019
	Fludioxonil	0.048	Mango	Israel	2019
	Fludioxonil	1.2	Pomegranate	Turkey	2019
	Fludioxonil	0.043	Pomegranate	Turkey	2019
	Fludioxonil	0.106	Pomegranate	Peru	2019
	Fludioxonil	0.149	Pomegranate	Turkey	2019
	Fludioxonil	0.013	Pomegranate	Peru	2019
	Fludioxonil	0.063	Pomegranate	Peru	2019
	Fludioxonil	0.052	Orange	South Africa	2019
	Fludioxonil	0.016	Orange	Spain	2019
	Fludioxonil	0.063	Orange	Morocco	2019
	Fludioxonil	0.266	Currants	The Netherlands	2019
	Fluopyram	0.068	Apple	Serbia	2019
	Fluopyram	0.152	Currants	The Netherlands	2019
	Flutolanil	0.01	Banana	Ecuador	2019
	Flutolanil	0.01	Mango	Brazil	2019
	Flutriafol	0.039	Grapes	North Macedonia	2019
	Flutriafol	0.032	Grapes	North Macedonia	2019
	Flutriafol	0.016	Plum	Serbia	2019
	Formothion	0.01	Peach	Greece	2019
	Formothion	0.078	Apple	North Macedonia	2019
	Formothion	0.06	Apple	Poland	2019
	Formothion	0.01	Apple	Italy	2019
	Formothion	0.01	Apple	Italy	2019
	Formothion	0.09	Apple	Serbia	2019
	Formothion	0.078	Apple	North Macedonia	2019
	Formothion	0.01	Apple	Serbia	2019
	Formothion	0.01	Apple	Serbia	2019
	Formothion	0.032	Apple	Serbia	2019
	Formothion	0.099	Apple	Serbia	2019
	Formothion	0.047	Apple	Serbia	2019
	Formothion	0.396	Apple	Serbia	2019
	Formothion	0.01	Apple	Poland	2019
	Formothion	0.01	Apple	Poland	2019
	Formothion	0.18	Mandarin	Turkey	2019
	Formothion	0.211	Mandarin	Turkey	2019
	Hexythiazox	0.032	Lemon	Spain	2019
	Hexythiazox	0.028	Lemon	Spain	2019
	Imazalil	0.052	Banana	Ecuador	2019
	Imazalil	0.036	Banana	Ecuador	2019
	Imazalil	0.164	Banana	Costa Rica	2019
	Imazalil	0.151	Banana	Ecuador	2019
	Imazalil	0.117	Banana	Guatemala	2019
	Imazalil	0.425	Banana	Ecuador	2019
	Imazalil	0.011	Banana	Colombia	2019
	Imazalil	0.422	Banana	Ecuador	2019
	Imazalil	0.094	Banana	Ecuador	2019
	Imazalil	0.114	Banana	Ecuador	2019
	Imazalil	0.169	Banana	Ecuador	2019
	Imazalil	0.084	Banana	Brazil	2019
	Imazalil	0.019	Banana	Colombia	2019
	Imazalil	0.141	Banana	Ecuador	2019
	Imazalil	0.155	Banana	Ecuador	2019
	Imazalil	0.199	Banana	Ecuador	2019
	Imazalil	0.015	Banana	Colombia	2019
	Imazalil	0.068	Banana	Costa Rica	2019
	Imazalil	0.269	Banana	Ecuador	2019
	Imazalil	0.096	Grapefruit	South Africa	2019
	Imazalil	0.343	Grapefruit	South Africa	2019
	Imazalil	0.321	Grapefruit	Zimbabwe	2019
	Imazalil	0.719	Grapefruit	South Africa	2019
	Imazalil	0.508	Grapefruit	South Africa	2019
	Imazalil	2.044	Grapefruit	South Africa	2019
	Imazalil	0.237	Grapefruit	South Africa	2019
	Imazalil	0.219	Grapefruit	South Africa	2019
	Imazalil	0.303	Grapefruit	South Africa	2019
	Imazalil	0.337	Grapefruit	South Africa	2019
	Imazalil	0.836	Grapefruit	South Africa	2019
	Imazalil	0.898	Grapefruit	Turkey	2019
	Imazalil	0.318	Grapefruit	South Africa	2019
	Imazalil	0.988	Grapefruit	South Africa	2019
	Imazalil	1.488	Grapefruit	Turkey	2019
	Imazalil	1.028	Grapefruit	Turkey	2019
	Imazalil	1.123	Grapefruit	Turkey	2019
	Imazalil	0.019	Apple	Serbia	2019
	Imazalil	0.019	Apple	Serbia	2019
	Imazalil	0.034	Apple	Serbia	2019
	Imazalil	0.016	Apple	Poland	2019
	Imazalil	0.016	Apple	Austria	2019
	Imazalil	1.895	Clementine	Spain	2019
	Imazalil	0.9	Lime	The Netherlands	2019
	Imazalil	0.305	Lime	Mexico	2019
	Imazalil	1.633	Lime	Brazil	2019
	Imazalil	0.542	Lime	Mexico	2019
	Imazalil	0.011	Lime	Mexico	2019
	Imazalil	0.313	Lime	Mexico	2019
	Imazalil	0.028	Lemon	Spain	2019
	Imazalil	0.518	Lemon	Egypt	2019
	Imazalil	0.73	Lemon	Uruguay	2019
	Imazalil	3.532	Lemon	Argentina	2019
	Imazalil	0.266	Lemon	South Africa	2019
	Imazalil	0.181	Lemon	Spain	2019
	Imazalil	4.45	Lemon	Spain	2019
	Imazalil	0.216	Lemon	Spain	2019
	Imazalil	1.227	Lemon	Argentina	2019
	Imazalil	0.305	Lemon	Argentina	2019
	Imazalil	0.036	Lemon	Argentina	2019
	Imazalil	0.391	Lemon	Turkey	2019
	Imazalil	1.026	Lemon	Spain	2019
	Imazalil	0.443	Lemon	Spain	2019
	Imazalil	1.003	Lemon	Uruguay	2019
	Imazalil	0.02	Lemon	Turkey	2019
	Imazalil	2.494	Lemon	Spain	2019
	Imazalil	2.671	Lemon	Turkey	2019
	Imazalil	0.08	Lemon	Spain	2019
	Imazalil	0.999	Lemon	Spain	2019
	Imazalil	0.012	Lemon	Spain	2019
	Imazalil	1.02	Lemon	Spain	2019
	Imazalil	0.159	Lemon	Spain	2019
	Imazalil	0.916	Lemon	Spain	2019
	Imazalil	0.012	Lemon	Spain	2019
	Imazalil	0.16	Lemon	Spain	2019
	Imazalil	0.105	Lemon	Turkey	2019
	Imazalil	0.884	Lemon	South Africa	2019
	Imazalil	0.778	Lemon	Spain	2019
	Imazalil	0.658	Lemon	South Africa	2019
	Imazalil	0.652	Lemon	Argentina	2019
	Imazalil	0.744	Lemon	Spain	2019
	Imazalil	0.493	Lemon	South Africa	2019
	Imazalil	1.303	Lemon	Argentina	2019
	Imazalil	0.972	Lemon	Argentina	2019
	Imazalil	3.331	Lemon	Spain	2019
	Imazalil	3.694	Lemon	Argentina	2019
	Imazalil	0.928	Lemon	Argentina	2019
	Imazalil	0.626	Lemon	Uruguay	2019
	Imazalil	1.207	Lemon	Turkey	2019
	Imazalil	0.663	Lemon	Turkey	2019
	Imazalil	0.264	Mandarin	Spain	2019
	Imazalil	0.393	Mandarin	Turkey	2019
	Imazalil	0.019	Mandarin	Turkey	2019
	Imazalil	0.64	Mandarin	Greece	2019
	Imazalil	0.845	Mandarin	Greece	2019
	Imazalil	0.057	Mandarin	Greece	2019
	Imazalil	0.965	Mandarin	Turkey	2019
	Imazalil	0.639	Mandarin	Greece	2019
	Imazalil	0.035	Mandarin	Greece	2019
	Imazalil	0.858	Mandarin	Turkey	2019
	Imazalil	0.462	Mandarin	Turkey	2019
	Imazalil	0.635	Mandarin	Turkey	2019
	Imazalil	0.653	Mandarin	Spain	2019
	Imazalil	0.023	Mandarin	Turkey	2019
	Imazalil	0.355	Mandarin	Croatia	2019
	Imazalil	0.682	Mandarin	Croatia	2019
	Imazalil	0.031	Mandarin	Turkey	2019
	Imazalil	0.594	Mandarin	Turkey	2019
	Imazalil	0.642	Mandarin	Turkey	2019
	Imazalil	0.59	Mandarin	Turkey	2019
	Imazalil	0.899	Mandarin	Turkey	2019
	Imazalil	0.527	Mandarin	Turkey	2019
	Imazalil	2.151	Mandarin	Spain	2019
	Imazalil	0.534	Mandarin	Spain	2019
	Imazalil	0.967	Mandarin	Spain	2019
	Imazalil	3.072	Mandarin	Spain	2019
	Imazalil	0.012	Mango	Brazil	2019
	Imazalil	0.013	Pomegranate	Turkey	2019
	Imazalil	0.013	Pomegranate	Turkey	2019
	Imazalil	0.172	Pomegranate	Turkey	2019
	Imazalil	0.014	Pomegranate	Turkey	2019
	Imazalil	0.026	Pomelo	China	2019
	Imazalil	0.039	Pomelo	China	2019
	Imazalil	1.316	Orange	Morocco	2019
	Imazalil	0.725	Orange	Spain	2019
	Imazalil	0.326	Orange	South Africa	2019
	Imazalil	1.908	Orange	Uruguay	2019
	Imazalil	0.611	Orange	South Africa	2019
	Imazalil	0.106	Orange	Greece	2019
	Imazalil	1.221	Orange	Morocco	2019
	Imazalil	1.997	Orange	Morocco	2019
	Imazalil	1.963	Orange	South Africa	2019
	Imazalil	0.401	Orange	Egypt	2019
	Imazalil	1.713	Orange	South Africa	2019
	Imazalil	0.201	Orange	Greece	2019
	Imazalil	0.282	Orange	South Africa	2019
	Imazalil	0.425	Orange	South Africa	2019
	Imazalil	0.454	Orange	Greece	2019
	Imazalil	0.047	Orange	Greece	2019
	Imazalil	0.079	Orange	Greece	2019
	Imazalil	1.443	Orange	Spain	2019
	Imazalil	1.127	Orange	Spain	2019
	Imazalil	0.269	Orange	Greece	2019
	Imazalil	0.641	Orange	Spain	2019
	Imazalil	2.451	Orange	Spain	2019
	Imazalil	0.143	Orange	Morocco	2019
	Imazalil	0.013	Orange	Italy	2019
	Imazalil	0.828	Orange	Egypt	2019
	Imazalil	0.158	Orange	Italy	2019
	Imazalil	2.708	Orange	Egypt	2019
	Imazalil	0.248	Orange	Egypt	2019
	Imazalil	0.442	Orange	Spain	2019
	Imazalil	0.132	Orange	Morocco	2019
	Imazalil	1.962	Orange	Egypt	2019
	Imazalil	0.492	Orange	Spain	2019
	Imazalil	0.264	Orange	Spain	2019
	Imazalil	0.731	Orange	South Africa	2019
	Imazalil	0.094	Orange	Greece	2019
	Imazalil	0.095	Orange	Spain	2019
	Imazalil	1.108	Orange	Morocco	2019
	Imazalil	0.742	Orange	Turkey	2019
	Imazalil	1.486	Orange	Egypt	2019
	Imazalil	0.181	Orange	Spain	2019
	Imazalil	0.142	Orange	South Africa	2019
	Imazalil	0.743	Orange	South Africa	2019
	Imazalil	0.391	Orange	South Africa	2019
	Imazalil	0.06	Orange	South Africa	2019
	Imazalil	1.462	Orange	South Africa	2019
	Imazalil	1.651	Orange	Turkey	2019
	Imazalil	1.231	Orange	Turkey	2019
	Imazalil	0.538	Orange	South Africa	2019
	Imazalil	0.659	Orange	South Africa	2019
	Imidacloprid	0.016	Grapefruit	South Africa	2019
	Imidacloprid	0.144	Grapefruit	South Africa	2019
	Imidacloprid	0.085	Grapefruit	South Africa	2019
	Imidacloprid	0.111	Grapefruit	South Africa	2019
	Imidacloprid	0.016	Apple	Poland	2019
	Imidacloprid	0.015	Lemon	South Africa	2019
	Imidacloprid	0.033	Pomegranate	Turkey	2019
	Imidacloprid	0.037	Pomegranate	Turkey	2019
	Imidacloprid	0.263	Pomegranate	Turkey	2019
	Imidacloprid	0.327	Pomegranate	Turkey	2019
	Imidacloprid	0.022	Peach (nectarine)	Serbia	2019
	Imidacloprid	0.011	Orange	Egypt	2019
	Indoxacarb	0.022	Grapes	North Macedonia	2019
	Indoxacarb	0.01	Apple	Poland	2019
	Indoxacarb	0.021	Apple	Poland	2019
	Ipconazole	0.01	Lemon	Spain	2019
	Iprodione	0.019	Lemon	South Africa	2019
	Iprodione	0.551	Orange	Turkey	2019
	Iprodione	0.021	Orange	Turkey	2019
	Kresoxim-methyl	0.047	Currants	The Netherlands	2019
	Lambda-cyhalothrin	0.032	Apple	Serbia	2019
	Lambda-cyhalothrin	0.03	Apple	Serbia	2019
	Lambda-cyhalothrin	0.098	Strawberry	Spain	2019
	Lambda-cyhalothrin	0.01	Clementine	Spain	2019
	Lambda-cyhalothrin	0.01	Lime	The Netherlands	2019
	Lambda-cyhalothrin	0.015	Lemon	Turkey	2019
	Lambda-cyhalothrin	0.035	Orange	Greece	2019
	Malaoxon	1.067	Grapefruit	South Africa	2019
	Malaoxon	0.419	Grapefruit	South Africa	2019
	Malaoxon	0.058	Lemon	Spain	2019
	Malathion	0.061	Grapefruit	Turkey	2019
	Malathion	0.028	Lime	Mexico	2019
	Malathion	0.064	Lemon	Turkey	2019
	Malathion	0.152	Lemon	Turkey	2019
	Malathion	0.276	Mandarin	Turkey	2019
	Malathion	0.025	Mandarin	Turkey	2019
	Malathion	0.065	Mandarin	Turkey	2019
	Malathion	0.021	Mandarin	Turkey	2019
	Malathion	0.101	Mandarin	Turkey	2019
	Malathion	0.418	Mandarin	Turkey	2019
	Malathion	0.707	Mandarin	Turkey	2019
	Malathion	0.125	Orange	South Africa	2019
	Malathion	0.014	Orange	Turkey	2019
	Mandipropamid	0.053	Grapes	India	2019
	Metaflumizone	0.05	Lemon	Spain	2019
	Metaflumizone	0.05	Pomegranate	Turkey	2019
	Metaflumizone	0.01	Orange	Spain	2019
	Metalaxyl	0.02	Grapefruit	South Africa	2019
	Metalaxyl	0.034	Grapefruit	South Africa	2019
	Metalaxyl	0.022	Grapes	Serbia	2019
	Metalaxyl	0.137	Grapes	North Macedonia	2019
	Metalaxyl	0.037	Apple	Serbia	2019
	Metalaxyl	0.025	Apple	Serbia	2019
	Metalaxyl	0.016	Apple	Italy	2019
	Metalaxyl	0.012	Pomegranate	Turkey	2019
	Metalaxyl	0.019	Orange	Spain	2019
	Metalaxyl-M	0.027	Grapes	North Macedonia	2019
	Metalaxyl-M	0.031	Grapes	Serbia	2019
	Metalaxyl-M	0.028	Grapes	Italy	2019
	Metalaxyl-M	0.347	Mandarin	Turkey	2019
	Methiocarb	0.024	Grapefruit	South Africa	2019
	Methoxyfenozide	0.027	Grapefruit	Zimbabwe	2019
	Methoxyfenozide	0.203	Grapefruit	South Africa	2019
	Methoxyfenozide	0.014	Grapes	Italy	2019
	Methoxyfenozide	0.036	Apple	Serbia	2019
	Methoxyfenozide	0.022	Apple	Poland	2019
	Methoxyfenozide	0.052	Apple	Slovenia	2019
	Methoxyfenozide	0.018	Apple	Poland	2019
	Methoxyfenozide	0.01	Lemon	South Africa	2019
	Methoxyfenozide	0.029	Pomegranate	Turkey	2019
	Methoxyfenozide	0.037	Pomegranate	Turkey	2019
	Methoxyfenozide	0.012	Pomegranate	Turkey	2019
	Methoxyfenozide	0.347	Pomegranate	Turkey	2019
	Methoxyfenozide	0.031	Pomegranate	Turkey	2019
	Methoxyfenozide	0.058	Orange	Spain	2019
	Methoxyfenozide	0.046	Orange	South Africa	2019
	Methoxyfenozide	0.076	Orange	South Africa	2019
	Metrafenone	0.051	Grapes	Turkey	2019
	Metribuzin	0.027	Apple	Italy	2019
	Metribuzin	0.025	Mandarin	Turkey	2019
	Metribuzin	0.016	Mandarin	Spain	2019
	Metribuzin	0.018	Orange	Italy	2019
	Metribuzin	0.011	Orange	Egypt	2019
	Myclobutanil	0.166	Banana	Colombia	2019
	Myclobutanil	0.062	Banana	Colombia	2019
	Myclobutanil	0.083	Banana	Colombia	2019
	Myclobutanil	0.158	Banana	Colombia	2019
	Myclobutanil	0.116	Banana	Colombia	2019
	Myclobutanil	0.086	Banana	Honduras	2019
	Myclobutanil	0.053	Banana	Colombia	2019
	Myclobutanil	0.059	Strawberry	Spain	2019
	Myclobutanil	0.021	Strawberry	Albania	2019
	Myclobutanil	0.094	Strawberry	Albania	2019
	Myclobutanil	0.035	Strawberry	Albania	2019
	Novaluron	0.01	Ananas	Costa Rica	2019
	Oxadixyl	0.01	Ananas	Colombia	2019
	Oxamyl	0.038	Lime	The Netherlands	2019
	Oxamyl	3.161	Lime	Mexico	2019
	Oxamyl	2.137	Lime	Mexico	2019
	Penconazole	0.013	Grapes	Italy	2019
	Penconazole	0.014	Grapes	Turkey	2019
	Penconazole	0.011	Apple	Serbia	2019
	Penconazole	0.024	Apple	Poland	2019
	Penconazole	0.149	Strawberry	Spain	2019
	Penconazole	0.05	Lemon	Spain	2019
	Permethrin	0.02	Grapefruit	South Africa	2019
	Phosmet	0.02	Apple	Serbia	2019
	Phosmet	0.055	Apple	Serbia	2019
	Phosmet	0.112	Apple	Serbia	2019
	Phosmet	0.046	Kiwi	Greece	2019
	Phosmet	0.284	Lime	Brazil	2019
	Phosmet	0.01	Lemon	Spain	2019
	Phosmet	0.016	Mandarin	Greece	2019
	Phosmet	0.267	Mandarin	Albania	2019
	Phosmet	0.032	Orange	Greece	2019
	Phosmet	0.14	Orange	Greece	2019
	Picoxystrobin	0.01	Grapefruit	South Africa	2019
	Picoxystrobin	0.01	Grapefruit	South Africa	2019
	Picoxystrobin	0.01	Grapes	India	2019
	Picoxystrobin	0.01	Apple	Poland	2019
	Picoxystrobin	0.01	Orange	Spain	2019
	Piperonyl-butoxide	0.01	Ananas	Costa Rica	2019
	Pirimicarb	0.11	Grapefruit	South Africa	2019
	Pirimicarb	0.052	Grapefruit	South Africa	2019
	Pirimicarb	0.044	Apple	Slovenia	2019
	Pirimicarb	0.014	Orange	Greece	2019
	Pirimiphos-methyl	0.01	Walnut	Bulgaria	2019
	Pirimiphos-methyl	0.01	Orange	Egypt	2019
	Prochloraz	0.364	Ananas	Costa Rica	2019
	Prochloraz	0.393	Ananas	Colombia	2019
	Prochloraz	0.839	Ananas	Colombia	2019
	Prochloraz	0.113	Ananas	Colombia	2019
	Prochloraz	0.536	Avocado	South Africa	2019
	Prochloraz	0.362	Avocado	Colombia	2019
	Prochloraz	0.025	Avocado	Tanzania	2019
	Prochloraz	0.217	Avocado	Tanzania	2019
	Prochloraz	0.01	Grapefruit	South Africa	2019
	Prochloraz	0.012	Grapefruit	South Africa	2019
	Prochloraz	0.916	Grapefruit	Turkey	2019
	Prochloraz	0.411	Grapefruit	Turkey	2019
	Prochloraz	0.059	Grapefruit	Turkey	2019
	Prochloraz	3.306	Lemon	Turkey	2019
	Prochloraz	0.074	Lemon	Turkey	2019
	Prochloraz	0.647	Lemon	Turkey	2019
	Prochloraz	0.181	Mandarin	Greece	2019
	Prochloraz	0.572	Mandarin	Turkey	2019
	Prochloraz	0.224	Mandarin	Turkey	2019
	Prochloraz	0.169	Mandarin	Turkey	2019
	Prochloraz	1.15	Mandarin	Turkey	2019
	Prochloraz	0.202	Mango	Peru	2019
	Prochloraz	0.189	Mango	Peru	2019
	Prochloraz	0.203	Mango	Peru	2019
	Prochloraz	0.028	Mango	Burkina Faso	2019
	Prochloraz	0.05	Pomegranate	Turkey	2019
	Prochloraz	0.026	Pomegranate	Turkey	2019
	Prochloraz	0.388	Pomegranate	Turkey	2019
	Propargite	0.01	Apple	Serbia	2019
	Propargite	0.01	Apple	Serbia	2019
	Propargite	0.01	Apple	Serbia	2019
	Propham	0.01	Grapes	India	2019
	Propham	0.01	Orange	Spain	2019
	Propiconazole	0.463	Grapefruit	Turkey	2019
	Propiconazole	0.02	Lime	Mexico	2019
	Propiconazole	0.024	Lemon	Spain	2019
	Propiconazole	1.975	Lemon	Argentina	2019
	Propiconazole	0.103	Lemon	Spain	2019
	Propiconazole	0.517	Lemon	Argentina	2019
	Propiconazole	0.397	Lemon	Uruguay	2019
	Propiconazole	0.065	Lemon	Spain	2019
	Propiconazole	0.08	Lemon	Argentina	2019
	Propiconazole	3.143	Lemon	Spain	2019
	Propiconazole	1.308	Lemon	South Africa	2019
	Propiconazole	0.179	Lemon	Argentina	2019
	Propiconazole	0.241	Lemon	Spain	2019
	Propiconazole	0.067	Lemon	Argentina	2019
	Propiconazole	0.218	Lemon	Argentina	2019
	Propiconazole	1.004	Lemon	Argentina	2019
	Propiconazole	0.179	Lemon	Argentina	2019
	Propiconazole	0.331	Lemon	Uruguay	2019
	Propiconazole	1.986	Lemon	Turkey	2019
	Propiconazole	0.014	Mandarin	Turkey	2019
	Propiconazole	0.018	Mandarin	Spain	2019
	Propiconazole	0.047	Mandarin	Turkey	2019
	Propiconazole	0.202	Mandarin	Turkey	2019
	Propiconazole	0.605	Mandarin	Turkey	2019
	Propiconazole	0.523	Mandarin	Turkey	2019
	Propiconazole	0.981	Mandarin	Spain	2019
	Propiconazole	0.036	Orange	Spain	2019
	Propiconazole	1.764	Orange	Uruguay	2019
	Propiconazole	0.054	Orange	Greece	2019
	Propiconazole	0.012	Orange	Morocco	2019
	Propiconazole	0.033	Orange	South Africa	2019
	Propiconazole	0.109	Orange	South Africa	2019
	Propiconazole	0.552	Orange	Spain	2019
	Propiconazole	0.062	Orange	Morocco	2019
	Propiconazole	0.351	Orange	South Africa	2019
	Propiconazole	0.116	Orange	Turkey	2019
	Propoxur	0.033	Lemon	Spain	2019
	Pyraclostrobin	0.018	Grapefruit	South Africa	2019
	Pyraclostrobin	0.01	Grapefruit	South Africa	2019
	Pyraclostrobin	0.014	Grapefruit	Zimbabwe	2019
	Pyraclostrobin	0.022	Grapefruit	South Africa	2019
	Pyraclostrobin	0.031	Grapefruit	South Africa	2019
	Pyraclostrobin	0.013	Grapefruit	South Africa	2019
	Pyraclostrobin	0.022	Grapes	North Macedonia	2019
	Pyraclostrobin	0.016	Apple	Poland	2019
	Pyraclostrobin	0.022	Apple	Poland	2019
	Pyraclostrobin	0.013	Lime	Brazil	2019
	Pyraclostrobin	0.123	Lemon	Argentina	2019
	Pyraclostrobin	0.014	Lemon	Argentina	2019
	Pyraclostrobin	0.012	Lemon	Argentina	2019
	Pyraclostrobin	0.011	Lemon	Argentina	2019
	Pyraclostrobin	0.017	Lemon	Uruguay	2019
	Pyraclostrobin	0.056	Orange	Zimbabwe	2019
	Pyraclostrobin	0.019	Orange	South Africa	2019
	Pyraclostrobin	0.025	Orange	Zimbabwe	2019
	Pyraclostrobin	0.021	Orange	Zimbabwe	2019
	Pyraclostrobin	0.024	Orange	South Africa	2019
	Pyraclostrobin	0.028	Orange	South Africa	2019
	Pyridaben	0.01	Lemon	Turkey	2019
	Pyridaben	0.026	Mandarin	Turkey	2019
	Pyrimethanil	0.012	Grapefruit	South Africa	2019
	Pyrimethanil	0.367	Grapefruit	South Africa	2019
	Pyrimethanil	1.502	Grapefruit	Turkey	2019
	Pyrimethanil	0.565	Grapefruit	Turkey	2019
	Pyrimethanil	0.142	Grapefruit	South Africa	2019
	Pyrimethanil	0.085	Grapes	Serbia	2019
	Pyrimethanil	0.071	Grapes	Chile	2019
	Pyrimethanil	0.065	Apple	Serbia	2019
	Pyrimethanil	0.011	Coconut	Ivory Coast	2019
	Pyrimethanil	0.179	Pear	Belgium	2019
	Pyrimethanil	0.563	Lemon	Uruguay	2019
	Pyrimethanil	0.075	Lemon	Spain	2019
	Pyrimethanil	0.248	Lemon	Spain	2019
	Pyrimethanil	0.131	Lemon	Spain	2019
	Pyrimethanil	0.394	Lemon	Argentina	2019
	Pyrimethanil	0.043	Lemon	Argentina	2019
	Pyrimethanil	0.199	Lemon	Turkey	2019
	Pyrimethanil	0.183	Lemon	Uruguay	2019
	Pyrimethanil	1.494	Lemon	Turkey	2019
	Pyrimethanil	2.322	Lemon	Spain	2019
	Pyrimethanil	0.167	Lemon	Spain	2019
	Pyrimethanil	0.256	Lemon	Spain	2019
	Pyrimethanil	0.055	Lemon	Spain	2019
	Pyrimethanil	1.1	Lemon	Spain	2019
	Pyrimethanil	0.236	Lemon	Spain	2019
	Pyrimethanil	0.236	Lemon	Spain	2019
	Pyrimethanil	0.044	Lemon	Spain	2019
	Pyrimethanil	0.579	Lemon	Argentina	2019
	Pyrimethanil	1.792	Lemon	South Africa	2019
	Pyrimethanil	0.564	Lemon	Spain	2019
	Pyrimethanil	1.303	Lemon	South Africa	2019
	Pyrimethanil	0.061	Lemon	Argentina	2019
	Pyrimethanil	0.479	Lemon	Spain	2019
	Pyrimethanil	0.102	Lemon	Spain	2019
	Pyrimethanil	0.224	Lemon	Argentina	2019
	Pyrimethanil	0.284	Lemon	Uruguay	2019
	Pyrimethanil	0.01	Mandarin	Greece	2019
	Pyrimethanil	0.756	Mandarin	Turkey	2019
	Pyrimethanil	0.02	Mandarin	Turkey	2019
	Pyrimethanil	1.377	Mandarin	Spain	2019
	Pyrimethanil	0.123	Mandarin	Spain	2019
	Pyrimethanil	0.01	Mandarin	Spain	2019
	Pyrimethanil	0.01	Pomegranate	Turkey	2019
	Pyrimethanil	0.106	Pomegranate	Turkey	2019
	Pyrimethanil	0.067	Pomegranate	Turkey	2019
	Pyrimethanil	0.033	Orange	Morocco	2019
	Pyrimethanil	0.467	Orange	South Africa	2019
	Pyrimethanil	0.013	Orange	Uruguay	2019
	Pyrimethanil	0.98	Orange	South Africa	2019
	Pyrimethanil	0.209	Orange	Morocco	2019
	Pyrimethanil	0.106	Orange	Morocco	2019
	Pyrimethanil	1.301	Orange	South Africa	2019
	Pyrimethanil	0.05	Orange	Egypt	2019
	Pyrimethanil	2.15	Orange	South Africa	2019
	Pyrimethanil	2.72	Orange	Egypt	2019
	Pyrimethanil	0.432	Orange	Spain	2019
	Pyrimethanil	0.365	Orange	Spain	2019
	Pyrimethanil	0.384	Orange	Spain	2019
	Pyrimethanil	0.01	Orange	Egypt	2019
	Pyrimethanil	1.188	Orange	South Africa	2019
	Pyrimethanil	0.099	Orange	South Africa	2019
	Pyrimethanil	0.019	Orange	Turkey	2019
	Pyrimethanil	1.44	Orange	South Africa	2019
	Pyrimethanil	0.973	Orange	South Africa	2019
	Pyrimethanil	0.021	Plum	Serbia	2019
	Pyriproxyfen	0.018	Grapefruit	South Africa	2019
	Pyriproxyfen	0.012	Grapefruit	South Africa	2019
	Pyriproxyfen	0.012	Grapefruit	Turkey	2019
	Pyriproxyfen	0.011	Grapefruit	Turkey	2019
	Pyriproxyfen	0.01	Apple	Serbia	2019
	Pyriproxyfen	0.018	Apple	Serbia	2019
	Pyriproxyfen	0.067	Apple	Serbia	2019
	Pyriproxyfen	0.015	Lemon	Uruguay	2019
	Pyriproxyfen	0.015	Lemon	South Africa	2019
	Pyriproxyfen	0.071	Lemon	Turkey	2019
	Pyriproxyfen	0.016	Lemon	Turkey	2019
	Pyriproxyfen	0.011	Lemon	Spain	2019
	Pyriproxyfen	0.02	Lemon	Spain	2019
	Pyriproxyfen	0.011	Lemon	Spain	2019
	Pyriproxyfen	0.03	Lemon	Spain	2019
	Pyriproxyfen	0.024	Lemon	Turkey	2019
	Pyriproxyfen	0.134	Lemon	Spain	2019
	Pyriproxyfen	0.014	Lemon	South Africa	2019
	Pyriproxyfen	0.01	Lemon	Spain	2019
	Pyriproxyfen	0.036	Lemon	South Africa	2019
	Pyriproxyfen	0.014	Lemon	Turkey	2019
	Pyriproxyfen	0.014	Lemon	Turkey	2019
	Pyriproxyfen	0.019	Lemon	Turkey	2019
	Pyriproxyfen	0.035	Lemon	Turkey	2019
	Pyriproxyfen	0.065	Lemon	Turkey	2019
	Pyriproxyfen	0.066	Lemon	Turkey	2019
	Pyriproxyfen	0.04	Mandarin	Turkey	2019
	Pyriproxyfen	0.016	Mandarin	Spain	2019
	Pyriproxyfen	0.01	Mandarin	Greece	2019
	Pyriproxyfen	0.017	Mandarin	Greece	2019
	Pyriproxyfen	0.019	Mandarin	Turkey	2019
	Pyriproxyfen	0.02	Mandarin	Turkey	2019
	Pyriproxyfen	0.062	Mandarin	Turkey	2019
	Pyriproxyfen	0.063	Mandarin	Turkey	2019
	Pyriproxyfen	0.01	Mandarin	Turkey	2019
	Pyriproxyfen	0.029	Mandarin	Spain	2019
	Pyriproxyfen	0.044	Mandarin	Turkey	2019
	Pyriproxyfen	0.02	Mandarin	Turkey	2019
	Pyriproxyfen	0.018	Pomegranate	Turkey	2019
	Pyriproxyfen	0.064	Orange	Spain	2019
	Pyriproxyfen	0.01	Orange	Egypt	2019
	Quizalofop-p-ethyl	0.034	Grapefruit	Turkey	2019
	Spirodiclofen	0.052	Pear	Serbia	2019
	Spirodiclofen	0.023	Pear	Serbia	2019
	Spirodiclofen	0.01	Lemon	Spain	2019
	Spirotetramat	0.028	Grapes	Turkey	2019
	Spirotetramat	0.02	Grapes	Turkey	2019
	Spirotetramat	0.226	Kiwi	Greece	2019
	Spirotetramat	0.018	Orange	Turkey	2019
	Spirotetramat	0.021	Orange	Turkey	2019
	Spiroxamine	0.017	Grapes	North Macedonia	2019
	Spiroxamine	0.01	Grapes	North Macedonia	2019
	Spiroxamine	0.083	Grapes	North Macedonia	2019
	Spiroxamine	0.028	Grapes	Italy	2019
	Tebuconazole	0.011	Peach	Greece	2019
	Tebuconazole	0.016	Peach	Greece	2019
	Tebuconazole	0.09	Grapes	Turkey	2019
	Tebuconazole	0.012	Grapes	North Macedonia	2019
	Tebuconazole	0.122	Grapes	Turkey	2019
	Tebuconazole	0.079	Apple	Serbia	2019
	Tebuconazole	0.014	Apple	Serbia	2019
	Tebuconazole	0.02	Pear	Spain	2019
	Tebuconazole	0.031	Pear	Serbia	2019
	Tebuconazole	0.028	Lime	Brazil	2019
	Tebuconazole	0.115	Lemon	Turkey	2019
	Tebuconazole	0.014	Lemon	Spain	2019
	Tebuconazole	0.043	Sour cherry	Hungary	2019
	Tebufenozide	0.014	Grapefruit	Zimbabwe	2019
	Tebufenozide	0.012	Grapefruit	South Africa	2019
	Tebufenozide	0.013	Grapefruit	South Africa	2019
	Tebufenozide	0.015	Grapefruit	Turkey	2019
	Tebufenozide	0.018	Lime	Mexico	2019
	Tebufenpyrad	0.01	Grapes	Italy	2019
	Teflubenzuron	0.011	Apple	Serbia	2019
	Teflubenzuron	0.01	Mandarin	Turkey	2019
	Teflubenzuron	0.01	Mandarin	Turkey	2019
	Teflubenzuron	0.01	Mandarin	Turkey	2019
	Teflubenzuron	0.01	Mandarin	Turkey	2019
	Teflubenzuron	0.01	Mandarin	Turkey	2019
	Tetraconazole	0.013	Banana	Costa Rica	2019
	Tetraconazole	0.01	Banana	Honduras	2019
	Tetraconazole	0.01	Peach	Greece	2019
	Tetraconazole	0.013	Grapes	North Macedonia	2019
	Tetraconazole	0.015	Apple	North Macedonia	2019
	Tetraconazole	0.011	Apple	North Macedonia	2019
	Tetraconazole	0.01	Apple	Serbia	2019
	Tetraconazole	0.013	Kiwi	Greece	2019
	Tetraconazole	0.015	Kiwi	North Macedonia	2019
	Tetraconazole	0.013	Pear	Serbia	2019
	Tetraconazole	0.014	Pomegranate	Turkey	2019
	Tetraconazole	0.012	Orange	Zimbabwe	2019
	Tetraconazole	0.011	Orange	Turkey	2019
	Thiabendazole	0.018	Avocado	Kenya	2019
	Thiabendazole	0.031	Banana	Ecuador	2019
	Thiabendazole	0.013	Banana	Ecuador	2019
	Thiabendazole	0.098	Banana	Costa Rica	2019
	Thiabendazole	0.075	Banana	Ecuador	2019
	Thiabendazole	0.112	Banana	Ecuador	2019
	Thiabendazole	0.073	Banana	Guatemala	2019
	Thiabendazole	0.229	Banana	Ecuador	2019
	Thiabendazole	0.158	Banana	Panama	2019
	Thiabendazole	0.331	Banana	Honduras	2019
	Thiabendazole	0.396	Banana	Ecuador	2019
	Thiabendazole	0.104	Banana	Ecuador	2019
	Thiabendazole	0.046	Banana	Ecuador	2019
	Thiabendazole	0.125	Banana	Ecuador	2019
	Thiabendazole	0.044	Banana	Brazil	2019
	Thiabendazole	0.049	Banana	Ecuador	2019
	Thiabendazole	0.093	Banana	Ecuador	2019
	Thiabendazole	0.033	Banana	Ecuador	2019
	Thiabendazole	0.056	Banana	Ecuador	2019
	Thiabendazole	0.152	Banana	Colombia	2019
	Thiabendazole	0.241	Banana	Ecuador	2019
	Thiabendazole	0.158	Banana	Ecuador	2019
	Thiabendazole	0.126	Banana	Honduras	2019
	Thiabendazole	0.088	Banana	Guatemala	2019
	Thiabendazole	0.032	Banana	Honduras	2019
	Thiabendazole	0.142	Banana	Ecuador	2019
	Thiabendazole	0.097	Banana	Ecuador	2019
	Thiabendazole	0.013	Banana	Costa Rica	2019
	Thiabendazole	0.08	Banana	Mexico	2019
	Thiabendazole	0.072	Grapefruit	South Africa	2019
	Thiabendazole	0.128	Grapefruit	Zimbabwe	2019
	Thiabendazole	0.193	Grapefruit	South Africa	2019
	Thiabendazole	1.19	Grapefruit	South Africa	2019
	Thiabendazole	0.176	Grapefruit	South Africa	2019
	Thiabendazole	0.126	Grapefruit	Zimbabwe	2019
	Thiabendazole	0.163	Grapefruit	South Africa	2019
	Thiabendazole	0.185	Grapefruit	South Africa	2019
	Thiabendazole	2.476	Grapefruit	South Africa	2019
	Thiabendazole	0.164	Grapefruit	Turkey	2019
	Thiabendazole	0.067	Grapefruit	South Africa	2019
	Thiabendazole	0.493	Grapefruit	South Africa	2019
	Thiabendazole	0.055	Grapefruit	Turkey	2019
	Thiabendazole	0.107	Grapefruit	Turkey	2019
	Thiabendazole	0.414	Grapefruit	South Africa	2019
	Thiabendazole	0.05	Pear	Argentina	2019
	Thiabendazole	0.07	Lime	Mexico	2019
	Thiabendazole	0.243	Lime	Mexico	2019
	Thiabendazole	0.079	Lime	Mexico	2019
	Thiabendazole	0.03	Lime	Mexico	2019
	Thiabendazole	0.082	Lime	Mexico	2019
	Thiabendazole	0.148	Lime	Mexico	2019
	Thiabendazole	0.047	Lime	Mexico	2019
	Thiabendazole	0.057	Lemon	Egypt	2019
	Thiabendazole	0.142	Lemon	Argentina	2019
	Thiabendazole	0.047	Lemon	South Africa	2019
	Thiabendazole	0.075	Lemon	Argentina	2019
	Thiabendazole	0.075	Lemon	South Africa	2019
	Thiabendazole	0.137	Lemon	South Africa	2019
	Thiabendazole	0.397	Lemon	Argentina	2019
	Thiabendazole	0.216	Lemon	Spain	2019
	Thiabendazole	0.064	Lemon	South Africa	2019
	Thiabendazole	0.179	Lemon	Argentina	2019
	Thiabendazole	0.045	Lemon	Turkey	2019
	Thiabendazole	0.077	Lemon	Turkey	2019
	Thiabendazole	0.058	Mandarin	Turkey	2019
	Thiabendazole	0.218	Mandarin	Turkey	2019
	Thiabendazole	0.078	Mandarin	Turkey	2019
	Thiabendazole	0.257	Mandarin	Turkey	2019
	Thiabendazole	0.018	Mandarin	Turkey	2019
	Thiabendazole	0.023	Mandarin	Turkey	2019
	Thiabendazole	0.044	Mandarin	Spain	2019
	Thiabendazole	1.44	Mandarin	Spain	2019
	Thiabendazole	0.098	Orange	South Africa	2019
	Thiabendazole	0.251	Orange	Uruguay	2019
	Thiabendazole	0.193	Orange	South Africa	2019
	Thiabendazole	0.037	Orange	South Africa	2019
	Thiabendazole	0.021	Orange	Greece	2019
	Thiabendazole	0.116	Orange	Morocco	2019
	Thiabendazole	1.368	Orange	Morocco	2019
	Thiabendazole	1.049	Orange	South Africa	2019
	Thiabendazole	1.256	Orange	South Africa	2019
	Thiabendazole	0.15	Orange	South Africa	2019
	Thiabendazole	0.065	Orange	Zimbabwe	2019
	Thiabendazole	0.105	Orange	South Africa	2019
	Thiabendazole	0.38	Orange	Zimbabwe	2019
	Thiabendazole	1.202	Orange	Egypt	2019
	Thiabendazole	0.11	Orange	Egypt	2019
	Thiabendazole	0.074	Orange	Spain	2019
	Thiabendazole	0.16	Orange	Egypt	2019
	Thiabendazole	0.192	Orange	Egypt	2019
	Thiabendazole	0.012	Orange	Spain	2019
	Thiabendazole	0.228	Orange	South Africa	2019
	Thiabendazole	0.687	Orange	Morocco	2019
	Thiabendazole	0.214	Orange	Turkey	2019
	Thiabendazole	0.346	Orange	Egypt	2019
	Thiabendazole	0.13	Orange	Spain	2019
	Thiabendazole	0.011	Orange	South Africa	2019
	Thiabendazole	0.562	Orange	South Africa	2019
	Thiabendazole	0.043	Orange	South Africa	2019
	Thiabendazole	0.577	Orange	South Africa	2019
	Thiabendazole	0.449	Orange	Turkey	2019
	Thiabendazole	0.499	Orange	Turkey	2019
	Thiabendazole	0.291	Orange	South Africa	2019
	Thiabendazole	0.218	Orange	South Africa	2019
	Thiacloprid	0.01	Apple	Serbia	2019
	Thiacloprid	0.02	Strawberry	Greece	2019
	Thiacloprid	0.058	Strawberry	Albania	2019
	Thiacloprid	0.022	Strawberry	Albania	2019
	Thiacloprid	0.089	Pear	Spain	2019
	Thiacloprid	0.017	Pomegranate	Turkey	2019
	Thiamethoxam	0.015	Grapes	India	2019
	Thiamethoxam	0.026	Apple	Poland	2019
	Thiophanate-methyl	0.036	Peach	Serbia	2019
	Thiophanate-methyl	0.058	Grapes	Turkey	2019
	Thiophanate-methyl	0.033	Apple	Poland	2019
	Thiophanate-methyl	0.013	Apple	North Macedonia	2019
	Thiophanate-methyl	0.021	Apricot	Serbia	2019
	Thiophanate-methyl	0.013	Kiwi	North Macedonia	2019
	Thiophanate-methyl	0.019	Pomegranate	Turkey	2019
	Thiophanate-methyl	0.066	Pomegranate	Turkey	2019
	Trifloxystrobin	0.022	Apple	Serbia	2019
	Trifloxystrobin	0.014	Apple	Serbia	2019
	Trifloxystrobin	0.144	Strawberry	Spain	2019
	Trifloxystrobin	0.021	Peach (nectarine)	Serbia	2019
	Trifloxystrobin	0.088	Currants	The Netherlands	2019
	Zoxamide	0.025	Grapes	Bosnia and Herzegovina	2019
